# Supplementary material for: Rethinking Maritime Carbon Capture: Onshore versus Onboard Solvent Regeneration
Source: Research Square preprint supplement (doi:10.21203/rs.3.rs-7076698/v1), 2025-07-31
Supplement: Supplementary file 1 [file 067c07d3e7304d39f9fe6ccf.docx]

**Rethinking Maritime Carbon Capture:
Onshore versus Onboard Solvent Regeneration**

**Supplementary Information**

[Supplementary Note 1. Routes and container vessels information 2](#_Toc201600153)

[Supplementary Note 2. Propulsion-related CO2 emissions 5](#_Toc201600154)

[Supplementary Note 3. Energy requirement for CO2 liquefaction 7](#_Toc201600155)

[Supplementary Note 4. Regeneration heat of different solvents 8](#_Toc201600156)

[Supplementary Note 5. Cost of regeneration and liquefaction for different regeneration schemes 9](#_Toc201600157)

[Supplementary Note 6. Rich-solvent weight ratio 12](#_Toc201600158)

[Supplementary Note 7. SBCC-load-To-ship-net-tonnage ratio for the onboard regeneration scheme at 90% capture rate 13](#_Toc201600159)

[Supplementary Note 8. SBCC-load-To-ship-net-tonnage ratio for the onshore regeneration scheme at 90% capture rate 22](#_Toc201600160)

[Supplementary Note 9. Fixed equipment cost for the onboard regeneration scheme 24](#_Toc201600161)

[Supplementary Note 10. Fixed equipment cost for the onshore regeneration scheme 26](#_Toc201600162)

[Supplementary Note 11. Transportation cost 29](#_Toc201600163)

[Supplementary Note 12. Capture cost for the onboard regeneration scheme 30](#_Toc201600164)

[Supplementary Note 13. Capture cost for the onshore regeneration scheme 39](#_Toc201600165)

[Supplementary Note 14. 2030–2050 Carbon tax and emission factors 43](#_Toc201600166)

[Supplementary Note 15. Total Cost with Carbon Tax (TCT) for onboard regeneration 45](#_Toc201600167)

[Supplementary Note 16. Total Cost with Carbon Tax (TCT) for onshore regeneration 50](#_Toc201600168)

[Supplementary Note 17. Scheme comparison and selection 55](#_Toc201600169)

[Supplementary Note 18. Unit penalty 60](#_Toc201600170)

[Supplementary Tables 62](#_Toc201600171)

Supplementary Note 1. Routes and container vessels information

Supplementary Tables 1-3 present the basic information of the 16 container shipping routes passing through the Nansha port. The data includes vessel registration details (vessel name, IMO number, classification society, and flag state), vessel dimensions (length, width, deadweight tonnage, net tonnage, and container capacity), as well as the propulsion engine model for each corresponding ship.

Supplementary Table 1. Registration details of container ships corresponding to the routes

| Routes | Ship name | IMO number | Registered society | Flag |
| --- | --- | --- | --- | --- |
| FEW 3 | MAERSK ENSHI1 | 9502946 | DNV2 | Panama (PA) |
| FEW 6 | COSCO KOREA3 | 9448750 | DNV2 | Hong Kong China (HK) |
| TP17 Eastbound | NORTHERN JAGUAR4 | 9466972 | DNV2 | Portugal (PT) |
| AE11 Westbound | MSC FEBE5 | 9839478 | DNV2 | Panama (PA) |
| AE7 Eastbound | MAERSK CINCINNATI6 | 9936410 | DNV2 | Hong Kong China (HK) |
| AE7 Westbound | MAERSK HAMBURG7 | 9784312 | ABS8 | Singapore (SG) |
| TP17 Westbound | MAERSK TAIKUNG9 | 9334662 | ABS8 | Hong Kong China (HK) |
| TP2 Eastbound | MSC PALOMA10 | 9441001 | DNV2 | Panama (PA) |
| TP2 Westbound | MSC PALOMA10 | 9441001 | DNV2 | Panama (PA) |
| IA7 | MAERSK QINZHOU11 | 9858709 | NKK12 | Singapore (SG) |
| IA8 | GSL VINIA13 | 9280653 | BV14 | Liberia (LR) |
| ME Eastbound | XIN HUANG PU15 | 9310044 | CCS16 | China (CN) |
| ME Westbound | XIN HUANG PU15 | 9310044 | CCS16 | China (CN) |
| IA1 | REN JIAN 2617 | 9450947 | CCS16 | China (CN) |
| IA88 | MAERSK NORESUND18 | 9894686 | NKK12 | Panama (PA) |
| PH5 | MAERSK NINGBO19 | 9402639 | ABS8 | Hong Kong China (HK) |

Supplementary Table 2. Container ship dimensions for the routes investigated

| Routes | Length (m) | Width (m) | Deadweight Tonnage (tonne) | Net Tonnage (tonne) | Container capacity (TEUa) |
| --- | --- | --- | --- | --- | --- |
| FEW 3 | 366 | 48.27 | 147340 | 64587 | 13676 |
| FEW 6 | 334 | 42.86 | 102710 | 55451 | 8501 |
| TP17 Eastbound | 333.59 | 43.28 | 108731 | 54884 | 8814 |
| AE11 Westbound | 399.9 | 61.54 | 254042 | 132544 | 24034 |
| AE7 Eastbound | 365.98 | 51.09 | 172053 | 79275 | 15516 |
| AE7 Westbound | 353.02 | 53.5 | 178257.3 | 79806 | 15282 |
| TP17 Westbound | 332 | 43.2 | 113478.4 | 85378 | 8112 |
| TP2 Eastbound | 365.49 | 51.28 | 190343 | 90033 | 14000 |
| TP2 Westbound | 365.49 | 51.28 | 190343 | 90033 | 14000 |
| IA7 | 185.99 | 35.6 | 37500 | 12,452 | 2806 |
| IA8 | 277.28 | 40 | 73260 | 37549 | 5782 |
| ME Eastbound | 251.4 | 32.2 | 52247 | 24,001 | 4250 |
| ME Westbound | 251.4 | 32.2 | 52247 | 24,001 | 4250 |
| IA1 | 260.25 | 32.2 | 54370 | 25,378 | 4395 |
| IA88 | 171.93 | 32.2 | 28,697 | 7,742 | 2086 |
| PH5 | 208 | 29 | 34194 | 12996 | 2546 |

a TEU: Twenty-foot Equivalent Unit

Supplementary Table 3. Container ship engine model corresponding to the routes

| Routes | Propulsion engines |
| --- | --- |
| FEW 3 | Winterthur Gas & Diesel Ltd. 12RT-flex96C-B |
| FEW 6 | MAN Energy Solutions, branch of MAN Energy Solutions SE, Germany 11K98ME-C |
| TP17 Eastbound | MAN Diesel & Turbo, Filial of MAN Diesel & Turbo SE, Tyskland 10K98ME-C |
| AE11 Westbound | MAN Diesel & Turbo, Filial of MAN Diesel & Turbo SE, Tyskland 11G95ME-C |
| AE7 Eastbound | MAN Diesel 8G95ME-C10.6-EGRTC |
| AE7 Westbound | HHI-MAN 8G95ME-C9.5 |
| TP17 Westbound | DOOSAN ENGINE CO.LTD. 12RT-FLEX96C |
| TP2 Eastbound | 12K98 MC-C |
| TP2 Westbound | 12K98 MC-C |
| IA7 | Mitsui E&S Machinery Co., Ltd. Tamano Machinery Factory 1DE: 2 SA 6 CY |
| IA8 | (1) 2T - 10 cyl - 98.00 cm x 240.00 cm at 104 rpm |
| ME Eastbound | MAN B&W 8K90MC-C |
| ME Westbound | MAN B&W 8K90MC-C |
| IA1 | MAN B&W 8K90MC-C |
| IA88 | Mitsui E&S Machinery Co., Ltd. Tamano Machinery Factory 1DE: 2 SA 6 CY |
| PH5 | CSSC-MES DIESEL CO., LTD. 6K80MCC |

Supplementary Note 2. Propulsion-related CO2 emissions

The calculation of propulsion-related CO₂ emissions begins with estimating the ship’s fuel consumption. The daily fuel consumption for propulsion is calculated as:

where:

is the engine load factor, assumed to be 85% of full load capacity.20,21

is the specific fuel oil consumption, assumed to be 160 g/kWh for IFO 380 fuel.22

is the ship engine's maximum continuous rating of each route.

To convert fuel consumption to CO2 emissions, the emission factor () is applied. This factor assumes 3.1 tonnes of CO₂ are emitted per tonne of fuel consumed.23 Thus, the propulsion CO₂ emissions per day are given by:

To determine the propulsion-related CO₂ emissions over a segment (), the transportation time for each route segment is incorporated:

The total propulsion CO₂ emissions for the entire voyage () is obtained by summing over all segments:

The results are shown in Supplementary Table 4, and segment- and voyage-level values of are presented in Supplementary Data 1 (excel file).

Supplementary Table 4. Propulsion-related CO2 emissions

| Routes | (kw) | (days) | (tonne/day) | (tonne/day) | (tonne) |
| --- | --- | --- | --- | --- | --- |
| FEW 3 | 68640 | 88 | 224.0 | 694.5 | 61118.4 |
| FEW 6 | 66220 | 55 | 216.1 | 670.0 | 36852.2 |
| TP17 Eastbound | 57100 | 44 | 186.4 | 577.8 | 25421.5 |
| AE11 Westbound | 75570 | 49 | 246.7 | 764.6 | 37467.7 |
| AE7 Eastbound | 54960 | 57 | 179.4 | 556.1 | 31698.1 |
| AE7 Westbound | 54960 | 47 | 179.4 | 556.1 | 26137.0 |
| TP17 Westbound | 68640 | 50 | 224.0 | 694.5 | 34726.3 |
| TP2 Eastbound | 72240 | 22 | 235.8 | 731.0 | 16081.0 |
| TP2 Westbound | 72240 | 42 | 235.8 | 731.0 | 30700.0 |
| IA7 | 16080 | 35 | 52.5 | 162.7 | 5694.6 |
| IA8 | 57100 | 42 | 186.4 | 577.8 | 24265.9 |
| ME Eastbound | 36560 | 29 | 119.3 | 369.9 | 10727.9 |
| ME Westbound | 36560 | 22 | 119.3 | 369.9 | 8138.4 |
| IA1 | 36560 | 42 | 119.3 | 369.9 | 15537.0 |
| IA88 | 13500 | 35 | 44.1 | 136.6 | 4780.9 |
| PH5 | 21660 | 33 | 70.7 | 219.2 | 7232.4 |

Supplementary Note 3. Energy requirement for CO2 liquefaction

The total electricity required for CO2 liquefaction includes both compression and refrigeration energy. Aspen Plus simulation results indicate that compressing CO2 (99 wt%) from the stripper to 20.4 bar consumes 73.9 kWh per tonne of CO2.


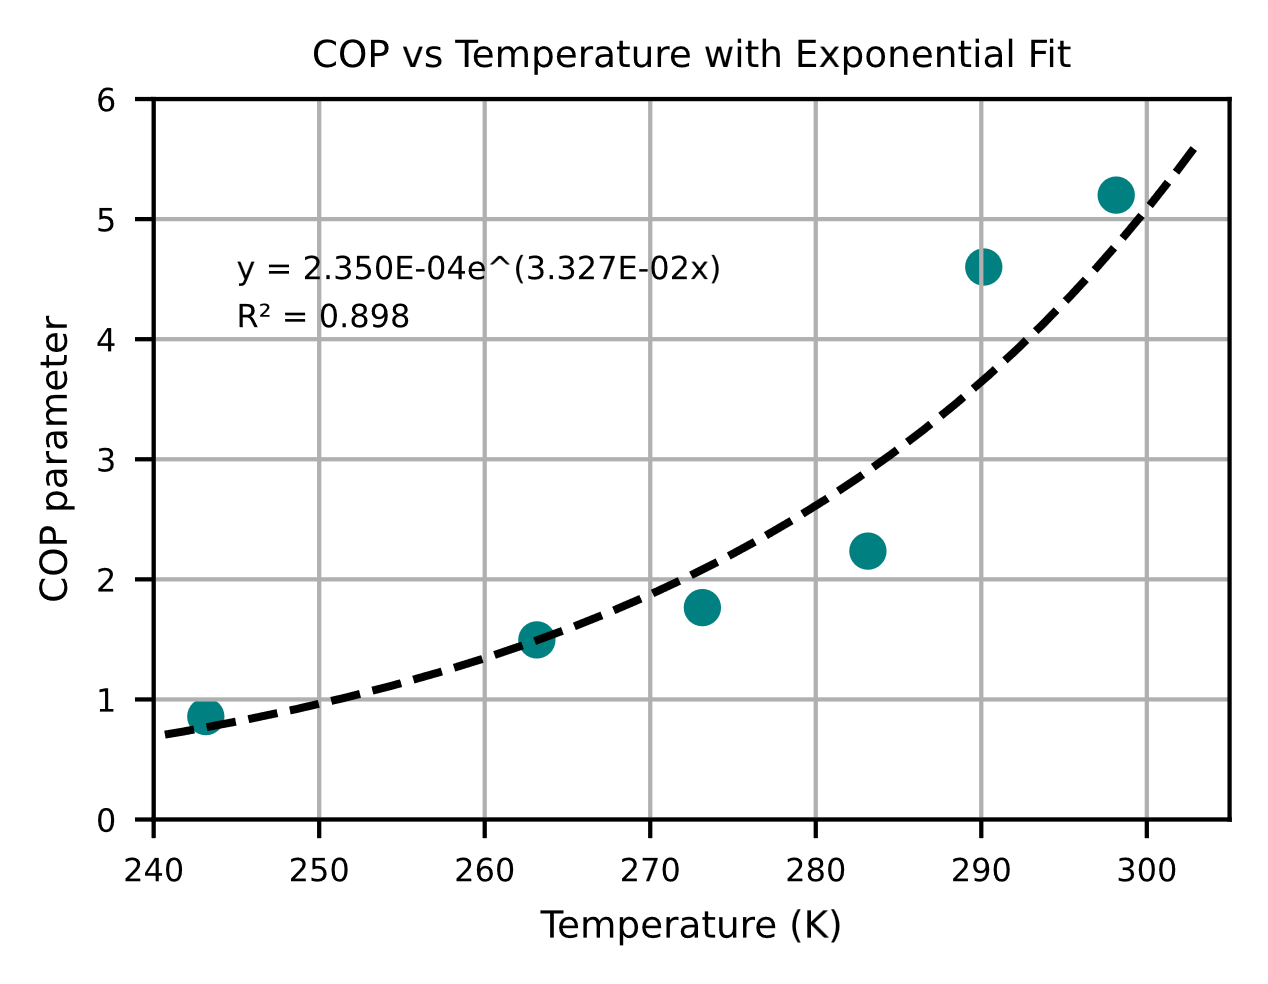


Supplementary Figure 1. COP parameter fitting curve

The refrigeration process is simulated in Aspen Plus, yielding heat duty of −95.98 kw. Applying the refrigeration COP (coefficient of performance) formula (Eq. 5) for a target temperature of −28.9°C gives a value of 0.79. Consequently, the refrigeration energy requirement is 122.6 kWh per tonne of CO₂ as calculated by Eq. 6.

Thus, the total electricity required for liquefaction is 196.5 kWh/tonne CO2 or equivalently 0.71 GJ/tonne CO2.

Supplementary Note 4. Regeneration heat of different solvents

1. Regeneration heat () per tonne of CO2 for MEA and PZ solvents

A surrogate model is used to estimate the regeneration heat of MEA and PZ, adapted to ship exhaust containing 4.8 wt% CO2 (3.0 mol%).24 The parameters of feed pressure (), CO2 molar fraction of feedstock (), capture rate (), sensitivity coefficient (*α*), weighting factor (*β*) and base value of steam consumption (*f*STM,0) used in the surrogate model are listed in Supplementary Table 5.The resulting regeneration heat of MEA and PZ are presented in Supplementary Table 6.

Supplementary Table 5. Parameter of surrogate model for regeneration heat of MEA and PZ

| Solvent | Parameters | | | | | |
| --- | --- | --- | --- | --- | --- | --- |
| (bar) |  |  | *α* | *β* | *f*STM,0 (GJ/tonne CO2) |
| MEA | 1.0 | 3 mol% | 90% | −0.5659 | 0.16 | 2.45 |
| PZ | 1.0 | 3 mol% | 90% | −0.0672 | 0.40 | 2.86 |

Supplementary Table 6. Regeneration heat (*RE*) of MEA and PZ for ship exhaust gas

| Solvent | (GJ/tonne CO2) |
| --- | --- |
| MEA | 4.6 |
| PZ | 3.2 |

1. Regeneration heat (*RE*) for solvents of NE-2 and DES (i.e. [MEA·Cl]:[EDA]=1:3)

NE-2 and DES have limited applications and reported calculations; their regeneration heats are extracted directly from literature (references provided in the main text).

Supplementary Table 7. Regeneration heat (*RE*) of NE-2 and DES for ship exhaust gas

| Solvent | CO2 capture rate | (GJ/tonne CO2) |
| --- | --- | --- |
| NE-2 | 90% | 2.2 |
| DES* | 90% | 3.2 |

* "[MEA·Cl]:[EDA]=1:3" is abbreviated as DES in the following sections

**Supplementary Note 5. Cost of regeneration and liquefaction for different regeneration schemes**

For onboard regeneration schemes, both CO2 regeneration and liquefaction processes occur onboard, leading to additional fuel consumption and thus higher CO2 emissions. In this case, the total onboard CO2 emissions consist of two components: emissions from ship propulsion and emissions generated by the regeneration and liquefaction processes. This relationship is expressed in Eq. 7:

where represents the additional CO2 emissions per day due to onboard regeneration and liquefaction.

For onshore regeneration schemes, all regeneration and liquefaction processes occur on land. Although these processes still consume energy and generate CO2 emissions, the associated emissions are attributed to the on-land system. These emissions are not included in the capture cost per tonne of CO2, but they are accounted for in the calculation of carbon tax and total cost. This means that in onshore regeneration schemes, no extra CO2 emissions are counted onboard, and .

1. **Onboard Regeneration Scheme**

The additional CO2 emissions () associated with solvent regeneration and liquefaction is calculated as:

where and represent the regeneration and liquefaction energy requirements per tonne of CO2, is the CO2 capture rate for each segment, is the boiler fuel consumption per unit energy output, and is the fuel’s CO2 emission factor. is estimated based on the lower heating value (LHV) of the fuel (42.7 MJ/kg). Assuming boiler thermal efficiency of 90%, the effective fuel consumption is calculated as the inverse of LHV adjusted by efficiency, resulting in 0.026 tonne/GJ.

(coefficient for additional carbon emissions) is a solvent-specific, dimensionless factor that simplifies the calculation of additional CO₂ emissions based on energy-related parameters. The results of for different solvents are listed in Supplementary Table 8.

Supplementary Table 8. Coefficients for additional carbon emissions for different solvents

| Solvent | (GJ/tonne CO2) | (GJ/tonne CO2) |  |
| --- | --- | --- | --- |
| MEA | 4.6 | 0.71 | 0.468 |
| PZ | 3.2 | 0.71 | 0.355 |
| NE-2 | 2.2 | 0.71 | 0.275 |
| DES | 3.2 | 0.71 | 0.355 |

Combining Eq. 8 and 9 gives:

Taking MEA as an example:

Given the carbon emission coefficients, the corresponding additional fuel consumption per day () can be determined.

Therefore, the cost of onboard regeneration and liquefaction per tonne of captured CO2 can be calculated as:

Heavy fuel oil (HFO), commonly used in shipping, includes various fuel types, making it difficult to determine a single representative price. Thus, in this study, the price of HFO is set to $500 per tonne, estimated based on the price of IFO 380—a widely used variant of HFO. 25.

By combining Eqs. 8, 9, 12, and 13, Eq. 14 can be derived showing that the cost of onboard regeneration and liquefaction per tonne of captured CO₂ is independent of both and the segmental capture rate . Instead, it is a constant determined solely by the coefficient for additional carbon emissions () associated with each solvent. The results are summarized in Supplementary Table 9:

Supplementary Table 9. Cost of onboard regeneration and liquefaction per tonne of CO2 captured ($/tonne CO2)

| Solvent | ($/tonne CO2) |
| --- | --- |
| MEA | 75.5 |
| PZ | 57.3 |
| NE-2 | 44.4 |
| DES | 57.3 |

1. **Onshore Regeneration Scheme**

The cost of onshore solvent regeneration is estimated based on the standard price of low-pressure steam, while the cost of CO₂ liquefaction is calculated using the electricity price of a typical onshore plant. The electricity price () is assumed to be $0.0775/kWh, equivalent to $21.5/GJ. The low-pressure steam price () is taken as $1.9 × 10⁻⁶/kJ, which corresponds to $1.9/GJ. Therefore, the cost of solvent regeneration and CO2 liquefaction per tonne of captured CO2 for onshore regeneration scheme can be calculated as:

Supplementary Table 10. Cost of onshore regeneration and liquefaction per tonne of CO2 captured ($/tonne CO2)

| Solvent | (GJ/tonne CO2) | (GJ/tonne CO2) | ($/tonne CO2) |
| --- | --- | --- | --- |
| MEA | 4.6 | 0.71 | 23.9 |
| PZ | 3.2 | 0.71 | 21.1 |
| NE-2 | 2.2 | 0.71 | 19.25 |
| DES | 3.2 | 0.71 | 21.1 |

Supplementary Note 6. Rich-solvent weight ratio

The rich-solvent weight ratio () is used to estimate the rich-solvent weight contributing to the SBCC load and cargo loss cost for the onshore regeneration scheme.

Amine solutions (MEA and PZ) are prepared as 30 wt% aqueous solutions. Based on the CO2 loading (mol CO2/mol amine) and the molecular weights of the solvent and CO2, the rich-solvent weight ratio for MEA and PZ is calculated as follows:

For NE-2, the highest reported CO2 absorption capacity (*γ*) is 1.78 mol CO2/L26. Since the exact density of the NE-2 solution (containing water) is unknown, it is assumed to be approximately equal to that of water. Using this assumption, the rich-solvent weight ratio is estimated as:

For DES, the calculation is based on CO2 uptake in weight percentage (wt%). The rich-solvent weight ratio for DES is calculated using:

The resulting values of for the four different solvents evaluated in this study are summarized in Supplementary Table 11.

Supplementary Table 11. Rich-solvent weight ratios of different solvents

| Solvent | Molecular weight (g/mol) | CO2 loading | (tonne rich-solvent / tonne CO2) |
| --- | --- | --- | --- |
| MEA27 | 61.1 | 0.5 mol CO2 / mol amine | 10.3 |
| PZ27 | 86.1 | 1.06 mol CO2 / mol amine | 7.2 |
| NE-226 | 106.4 | 1.78 mol CO2 / liter solution | 13.8 |
| DES28 | 69.5 | 33.7 wt% CO2 uptake | 4.0 |

Supplementary Note 7. SBCC-load-To-ship-net-tonnage ratio for the onboard regeneration scheme at 90% capture rate

The SBCC load for onboard regeneration is calculated for each voyage segment using the following equations:

1. Weight of CO2 emissions

At a 90% capture rate ( = 90%), the additional CO2 emissions () are calculated using Eq. 10, and the results are provided in Supplementary Table 12.

Supplementary Table 12. Additional CO2 emissions (tonne/day) at 90% capture rate using different solvents for the onboard regeneration scheme

| Routes | MEA | PZ | NE-2 | DES |
| --- | --- | --- | --- | --- |
| FEW 3 | 505.4 | 326.1 | 228.4 | 326.1 |
| FEW 6 | 487.6 | 314.6 | 220.4 | 314.6 |
| TP17 Eastbound | 420.4 | 271.3 | 190.0 | 271.3 |
| AE11 Westbound | 556.4 | 359.0 | 251.5 | 359.0 |
| AE7 Eastbound | 404.7 | 261.1 | 182.9 | 261.1 |
| AE7 Westbound | 404.7 | 261.1 | 182.9 | 261.1 |
| TP17 Westbound | 505.4 | 326.1 | 228.4 | 326.1 |
| TP2 Eastbound | 531.9 | 343.2 | 240.4 | 343.2 |
| TP2 Westbound | 531.9 | 343.2 | 240.4 | 343.2 |
| IA7 | 118.4 | 76.4 | 53.5 | 76.4 |
| IA8 | 420.4 | 271.3 | 190.0 | 271.3 |
| ME Eastbound | 269.2 | 173.7 | 121.7 | 173.7 |
| ME Westbound | 269.2 | 173.7 | 121.7 | 173.7 |
| IA1 | 269.2 | 173.7 | 121.7 | 173.7 |
| IA88 | 99.4 | 64.1 | 44.9 | 64.1 |
| PH5 | 159.5 | 102.9 | 72.1 | 102.9 |

By combining these values with the propulsion-related CO₂ emissions () from Supplementary Table 4, the total daily CO₂ emissions onboard () can be obtained, as shown in Supplementary Table 13.

Supplementary Table 13. Total daily CO2 emissions (tonne/day) at 90% capture rate using different solvents for the onboard regeneration scheme

| Routes | MEA | PZ | NE-2 | DES |
| --- | --- | --- | --- | --- |
| FEW 3 | 1199.9 | 1020.6 | 922.9 | 1020.6 |
| FEW 6 | 1157.6 | 984.6 | 890.4 | 984.6 |
| TP17 Eastbound | 998.2 | 849.1 | 767.8 | 849.1 |
| AE11 Westbound | 1321 | 1123.6 | 1016.1 | 1123.6 |
| AE7 Eastbound | 960.8 | 817.2 | 739 | 817.2 |
| AE7 Westbound | 960.8 | 817.2 | 739 | 817.2 |
| TP17 Westbound | 1199.9 | 1020.6 | 922.9 | 1020.6 |
| TP2 Eastbound | 1262.9 | 1074.2 | 971.4 | 1074.2 |
| TP2 Westbound | 1262.9 | 1074.2 | 971.4 | 1074.2 |
| IA7 | 281.1 | 239.1 | 216.2 | 239.1 |
| IA8 | 998.2 | 849.1 | 767.8 | 849.1 |
| ME Eastbound | 639.1 | 543.6 | 491.6 | 543.6 |
| ME Westbound | 639.1 | 543.6 | 491.6 | 543.6 |
| IA1 | 639.1 | 543.6 | 491.6 | 543.6 |
| IA88 | 236 | 200.7 | 181.5 | 200.7 |
| PH5 | 378.7 | 322.1 | 291.3 | 322.1 |

Based on the daily value, segment-level results for each route can be calculated. Taking the AE11 Westbound route as an example, with a 90% system capture rate using MEA, the CO2 emissions are summarized in Supplementary Table 14.

Supplementary Table 14. CO2 emissions for route AE11 Westbound at 90% capture rate using MEA for the onboard regeneration scheme

| Port | (days) | (tonne) | (tonne) | (tonne) |
| --- | --- | --- | --- | --- |
| Qingdao | - | 0 | 0 | 0 |
| Busan | 3 | 2293.9 | 1669.3 | 3963.3 |
| Ningbo | 5 | 3823.2 | 2782.2 | 6605.5 |
| Shanghai | 3 | 2293.9 | 1669.3 | 3963.3 |
| Xiamen | 4 | 3058.6 | 2225.8 | 5284.4 |
| Nansha New Port | 1 | 764.6 | 556.4 | 1321.1 |
| Yantian | 1 | 764.6 | 556.4 | 1321.1 |
| Singapore | 5 | 3823.2 | 2782.2 | 6605.5 |
| Port Said East | 15 | 11469.7 | 8346.7 | 19816.4 |
| Gioia Tauro | 4 | 3058.6 | 2225.8 | 5284.4 |
| Barcelona | 4 | 3058.6 | 2225.8 | 5284.4 |
| Valencia | 4 | 3058.6 | 2225.8 | 5284.4 |
| Total | 49 | 37467.7 | 27265.7 | 64733.5 |

The corresponding data for all routes using different solvents under the onboard regeneration scheme are provided in Supplementary Data 1 (excel file).

1. Weight of the CO2 storage tank

The tank size is determined by the maximum amount of CO2 captured between two ports—that is, the longest segment within a single voyage. For example, on the AE11 Westbound route, the longest segment spans 15 days — Singapore to Port Said East. CO2 is stored onboard in liquid form at −28.9°C and 20.4 bar, which requires a thick-walled storage tank. Given the density of liquefied CO2 (1.073 tonne/m³), the required tank volume for each route can be calculated as follows:

To ensure a practical tank design that fits within the ship’s structure, the CO2 storage tank is assumed to be located in the cargo area, with its longer side oriented perpendicular to the ship’s longitudinal axis. Assuming that the tank’s length is 2 meters shorter than the ship’s width, the tank volume is calculated as:

Let:

D and H can be solved. Then, the tank weight is calculated using the following equation:

Where:

is the tank wall thickness (m).

𝐷 is the tank diameter (m).

ℎ is the straight-edge height of the tank head (mm).

When the tank diameter is greater than 2 meters, ℎ is set to 40 mm; when the diameter is less than 2 meters, ℎ is set to 25 mm. The tank is made of stainless steel with a density of 7.9 tonne/m³.

Taking the AE11 Westbound route as an example, under a 90% CO2 capture rate using MEA at the onboard regeneration scheme, the ship has a width of 61.5 meters, and the tank length is assumed to be 59.5 meters (2 meters shorter than the ship's width). The storage tank is designed to accommodate a maximum CO2 mass of 17834.7 tonnes, which corresponds to a required storage volume of 16621.4 m³. Based on the above equations, the resulting tank diameter is 18.0 meters, and the total tank weight is calculated to be 5081.3 tonnes.

The corresponding storage tank specifications for different solvents at 90% capture rate are provided in Supplementary Tables 15-18.

Supplementary Table 15. Storage tank specifications for all routes using MEA at 90% capture rate

| Routes | Maximum CO2 stored in tank (tonne) | Volume of storage tank (m3) | Tank length (m) | Tank diameter (m) | Tank weight (tonne) |
| --- | --- | --- | --- | --- | --- |
| FEW 3 | 23758.9 | 22142.5 | 46.3 | 22.9 | 6046.1 |
| FEW 6 | 25005.0 | 23303.8 | 40.9 | 24.6 | 6308.0 |
| TP17 Eastbound | 22459.6 | 20931.6 | 41.3 | 23.3 | 5958.6 |
| AE11 Westbound | 17834.7 | 16621.4 | 59.5 | 18.0 | 5081.3 |
| AE7 Eastbound | 15564.9 | 14505.9 | 49.1 | 18.3 | 4824.4 |
| AE7 Westbound | 12970.7 | 12088.3 | 51.5 | 16.4 | 4368.8 |
| TP17 Westbound | 17279.2 | 16103.6 | 41.2 | 20.7 | 5205.1 |
| TP2 Eastbound | 17048.8 | 15888.9 | 49.3 | 19.1 | 5054.5 |
| TP2 Westbound | 22731.8 | 21185.3 | 49.3 | 21.8 | 5866.3 |
| IA7 | 2024.0 | 1886.3 | 33.6 | 8.1 | 1804.2 |
| IA8 | 8085.5 | 7535.4 | 38.0 | 14.9 | 3567.5 |
| ME Eastbound | 6902.6 | 6433.0 | 30.2 | 15.2 | 3422.9 |
| ME Westbound | 6327.4 | 5896.9 | 30.2 | 14.6 | 3275.2 |
| IA1 | 3451.3 | 3216.5 | 30.2 | 11.0 | 2410.4 |
| IA88 | 1062.0 | 989.8 | 30.2 | 6.2 | 1331.4 |
| PH5 | 2044.7 | 1905.6 | 27.0 | 9.0 | 1894.6 |

Supplementary Table 16. Storage tank specifications for all routes using PZ at 90% capture rate

| Routes | Maximum CO2 stored in tank (tonne) | Volume of storage tank (m3) | Tank length (m) | Tank diameter (m) | Tank weight (tonne) |
| --- | --- | --- | --- | --- | --- |
| FEW 3 | 20208.1 | 18833.3 | 46.3 | 21.2 | 5559.6 |
| FEW 6 | 21268.0 | 19821.1 | 40.9 | 22.8 | 5800.9 |
| TP17 Eastbound | 19103.0 | 17803.4 | 41.3 | 21.6 | 5480.2 |
| AE11 Westbound | 15169.3 | 14137.3 | 59.5 | 16.6 | 4673.7 |
| AE7 Eastbound | 13238.7 | 12338.0 | 49.1 | 16.9 | 4438.2 |
| AE7 Westbound | 11032.3 | 10281.7 | 51.5 | 15.2 | 4019.8 |
| TP17 Westbound | 14696.8 | 13696.9 | 41.2 | 19.1 | 4788.6 |
| TP2 Eastbound | 14500.9 | 13514.4 | 49.3 | 17.7 | 4649.4 |
| TP2 Westbound | 19334.5 | 18019.1 | 49.3 | 20.2 | 5394.3 |
| IA7 | 1721.5 | 1604.4 | 33.6 | 7.5 | 1662.7 |
| IA8 | 6877.1 | 6409.2 | 38.0 | 13.8 | 3284.7 |
| ME Eastbound | 5871.0 | 5471.6 | 30.2 | 14.1 | 3153.3 |
| ME Westbound | 5381.8 | 5015.6 | 30.2 | 13.6 | 3017.4 |
| IA1 | 2935.5 | 2735.8 | 30.2 | 10.2 | 2221.4 |
| IA88 | 903.3 | 841.8 | 30.2 | 5.8 | 1227.4 |
| PH5 | 1739.1 | 1620.8 | 27.0 | 8.3 | 1746.7 |

Supplementary Table 17. Storage tank specifications for all routes using NE-2 at 90% capture rate

| Routes | Maximum CO2 stored in tank (tonne) | Volume of storage tank (m3) | Tank length (m) | Tank diameter (m) | Tank weight (tonne) |
| --- | --- | --- | --- | --- | --- |
| FEW 3 | 18274.6 | 17031.3 | 46.3 | 20.2 | 5277.8 |
| FEW 6 | 19233.1 | 17924.6 | 40.9 | 21.8 | 5507.2 |
| TP17 Eastbound | 17275.2 | 16099.9 | 41.3 | 20.6 | 5203.1 |
| AE11 Westbound | 13717.9 | 12784.6 | 59.5 | 15.9 | 4437.4 |
| AE7 Eastbound | 11972.0 | 11157.5 | 49.1 | 16.2 | 4214.3 |
| AE7 Westbound | 9976.7 | 9297.9 | 51.5 | 14.5 | 3817.4 |
| TP17 Westbound | 13290.6 | 12386.4 | 41.2 | 18.3 | 4547.2 |
| TP2 Eastbound | 13113.4 | 12221.3 | 49.3 | 16.8 | 4414.6 |
| TP2 Westbound | 17484.6 | 16295.1 | 49.3 | 19.3 | 5120.9 |
| IA7 | 1556.8 | 1450.9 | 33.6 | 7.2 | 1580.5 |
| IA8 | 6219.1 | 5796.0 | 38.0 | 13.2 | 3120.6 |
| ME Eastbound | 5309.3 | 4948.1 | 30.2 | 13.5 | 2996.7 |
| ME Westbound | 4866.8 | 4535.7 | 30.2 | 12.9 | 2867.7 |
| IA1 | 2654.6 | 2474.0 | 30.2 | 9.7 | 2111.5 |
| IA88 | 816.9 | 761.3 | 30.2 | 5.5 | 1166.9 |
| PH5 | 1572.7 | 1465.7 | 27.0 | 7.9 | 1660.7 |

Supplementary Table 18. Storage tank specifications for all routes using DES at 90% capture rate

| Routes | Maximum CO2 stored in tank (tonne) | Volume of storage tank (m3) | Tank length (m) | Tank diameter (m) | Tank weight (tonne) |
| --- | --- | --- | --- | --- | --- |
| FEW 3 | 20208.1 | 18833.3 | 46.3 | 21.2 | 5559.6 |
| FEW 6 | 21268.0 | 19821.1 | 40.9 | 22.8 | 5800.9 |
| TP17 Eastbound | 19103.0 | 17803.4 | 41.3 | 21.6 | 5480.2 |
| AE11 Westbound | 15169.3 | 14137.3 | 59.5 | 16.6 | 4673.7 |
| AE7 Eastbound | 13238.7 | 12338.0 | 49.1 | 16.9 | 4438.2 |
| AE7 Westbound | 11032.3 | 10281.7 | 51.5 | 15.2 | 4019.8 |
| TP17 Westbound | 14696.8 | 13696.9 | 41.2 | 19.1 | 4788.6 |
| TP2 Eastbound | 14500.9 | 13514.4 | 49.3 | 17.7 | 4649.4 |
| TP2 Westbound | 19334.5 | 18019.1 | 49.3 | 20.2 | 5394.3 |
| IA7 | 1721.5 | 1604.4 | 33.6 | 7.5 | 1662.7 |
| IA8 | 6877.1 | 6409.2 | 38.0 | 13.8 | 3284.7 |
| ME Eastbound | 5871.0 | 5471.6 | 30.2 | 14.1 | 3153.3 |
| ME Westbound | 5381.8 | 5015.6 | 30.2 | 13.6 | 3017.4 |
| IA1 | 2935.5 | 2735.8 | 30.2 | 10.2 | 2221.4 |
| IA88 | 903.3 | 841.8 | 30.2 | 5.8 | 1227.4 |
| PH5 | 1739.1 | 1620.8 | 27.0 | 8.3 | 1746.7 |

Now, the and can be determined by Eqs 19 and 20.

The SBCC-load-To-ship-net-tonnage ratio per segment is given by:

The maximum SBCC-load-To-ship-net-tonnage ratio across the voyage is:

For the AE11 Westbound route under a 90% capture rate using the MEA onboard regeneration scheme, is 0.17, while the average ratio across the voyage is 0.07, as shown in Supplementary Table 19.

Supplementary Table 19. SBCC-load-To-ship-net-tonnage ratio for route AE11 Westbound at 90% capture rate using the MEA onboard regeneration scheme

| Port | / segment (tonne) | / segment (tonne) |  |
| --- | --- | --- | --- |
| Qingdao | 0 | 0 | 0.00 |
| Busan | 3566.9 | 8648.2 | 0.07 |
| Ningbo | 5944.9 | 11026.2 | 0.08 |
| Shanghai | 3566.9 | 8648.2 | 0.07 |
| Xiamen | 4755.9 | 9837.2 | 0.07 |
| Nansha New Port | 1189.0 | 6270.3 | 0.05 |
| Yantian | 1189.0 | 6270.3 | 0.05 |
| Singapore | 5944.9 | 11026.2 | 0.08 |
| Port Said East | 17834.7 | 22916.0 | 0.17 |
| Gioia Tauro | 4755.9 | 9837.2 | 0.07 |
| Barcelona | 4755.9 | 9837.2 | 0.07 |
| Valencia | 4755.9 | 9837.2 | 0.07 |
| Average/voyage | 4855.0 | 9512.9 | 0.07 |

The data of for all routes are provided in Supplementary Data 1 (excel file).

The maximum and average SBCC-load to ship-net-tonnage ratios for onboard regeneration using different solvents are summarized in Supplementary Tables 20 and 21, respectively.

Supplementary Table 20. Maximum SBCC-load to ship-net-tonnage ratio at 90% capture rate for the onboard regeneration scheme

| Routes | MEA | PZ | NE-2 | DES |
| --- | --- | --- | --- | --- |
| FEW 3 | 0.46 | 0.40 | 0.36 | 0.40 |
| FEW 6 | 0.56 | 0.49 | 0.45 | 0.49 |
| TP17 Eastbound | 0.52 | 0.45 | 0.41 | 0.45 |
| AE11 Westbound | 0.17 | 0.15 | 0.14 | 0.15 |
| AE7 Eastbound | 0.26 | 0.22 | 0.20 | 0.22 |
| AE7 Westbound | 0.22 | 0.19 | 0.17 | 0.19 |
| TP17 Westbound | 0.26 | 0.23 | 0.21 | 0.23 |
| TP2 Eastbound | 0.25 | 0.21 | 0.19 | 0.21 |
| TP2 Westbound | 0.32 | 0.27 | 0.25 | 0.27 |
| IA7 | 0.31 | 0.27 | 0.25 | 0.27 |
| IA8 | 0.31 | 0.27 | 0.25 | 0.27 |
| ME Eastbound | 0.43 | 0.38 | 0.35 | 0.38 |
| ME Westbound | 0.40 | 0.35 | 0.32 | 0.35 |
| IA1 | 0.23 | 0.20 | 0.19 | 0.20 |
| IA88 | 0.31 | 0.28 | 0.26 | 0.28 |
| PH5 | 0.30 | 0.27 | 0.25 | 0.27 |

Supplementary Table 21. Average SBCC-load to ship-net-tonnage ratio at 90% capture rate for the onboard regeneration scheme

| Routes | MEA | PZ | NE-2 | DES |
| --- | --- | --- | --- | --- |
| FEW 3 | 0.19 | 0.16 | 0.15 | 0.16 |
| FEW 6 | 0.21 | 0.18 | 0.17 | 0.18 |
| TP17 Eastbound | 0.17 | 0.15 | 0.14 | 0.15 |
| AE11 Westbound | 0.07 | 0.06 | 0.06 | 0.06 |
| AE7 Eastbound | 0.11 | 0.10 | 0.09 | 0.10 |
| AE7 Westbound | 0.09 | 0.08 | 0.08 | 0.08 |
| TP17 Westbound | 0.11 | 0.10 | 0.09 | 0.10 |
| TP2 Eastbound | 0.10 | 0.09 | 0.08 | 0.09 |
| TP2 Westbound | 0.14 | 0.13 | 0.12 | 0.13 |
| IA7 | 0.19 | 0.17 | 0.16 | 0.17 |
| IA8 | 0.15 | 0.14 | 0.13 | 0.14 |
| ME Eastbound | 0.23 | 0.21 | 0.19 | 0.21 |
| ME Westbound | 0.20 | 0.18 | 0.17 | 0.18 |
| IA1 | 0.15 | 0.14 | 0.13 | 0.14 |
| IA88 | 0.22 | 0.20 | 0.18 | 0.20 |
| PH5 | 0.20 | 0.18 | 0.17 | 0.18 |

Supplementary Note 8. SBCC-load-To-ship-net-tonnage ratio for the onshore regeneration scheme at 90% capture rate

The SBCC load of the onshore regeneration scheme is calculated as:

where is the daily CO₂ emissions (Supplementary Table 4), and is the rich-solvent weight ratio (Supplementary Table 11).

Taking the IA88 route using MEA as an example, the and is calculated using Eqs. 25 and 26 and shown in Supplementary Table 22. As shown, reaches 0.81, while the average value is 0.32. Detailed results of for the onshore regeneration scheme at 90% capture rate are provided in Supplementary Data 2 (excel file).

Supplementary Table 22. SBCC-load-To-ship-net-tonnage ratio for route IA88 at 90% capture rate using the MEA-based onshore regeneration scheme

| Port | (tonne/day) | (tonne) |  |
| --- | --- | --- | --- |
| Yokohama |  | 0 |  |
| Nagoya | 136.6 | 1260.7 | 0.16 |
| Osaka | 136.6 | 1260.7 | 0.16 |
| Kobe | 136.6 | 1260.7 | 0.16 |
| Moji | 136.6 | 1260.7 | 0.16 |
| Hibiki Nada | 136.6 | 1260.7 | 0.16 |
| Busan | 136.6 | 1260.7 | 0.16 |
| Gwangyang | 136.6 | 1260.7 | 0.16 |
| Shanghai | 409.8 | 3782.0 | 0.49 |
| Ningbo | 136.6 | 1260.7 | 0.16 |
| Ho Chi Minh City | 683.0 | 6303.4 | 0.81 |
| Laem Chabang | 546.4 | 5042.7 | 0.65 |
| Bangkok | 273.2 | 2521.4 | 0.33 |
| Laem Chabang | 136.6 | 1260.7 | 0.16 |
| Haiphong | 683.0 | 6303.4 | 0.81 |
| Hong Kong | 273.2 | 2521.4 | 0.33 |
| Nansha New Port | 0.0 | 0.0 | 0.00 |
| Yokohama | 683.0 | 6303.4 | 0.81 |
| Average/voyage | - | 2595.5 | 0.32 |

The maximum and average SBCC-load to ship-net-tonnage ratios for the onshore regeneration scheme are summarized in Supplementary Tables 23 and 24, respectively.

Supplementary Table 23. Maximum SBCC-load to ship-net-tonnage ratio at 90% capture rate for the onshore regeneration scheme

| Routes | MEA | PZ | NE-2 | DES |
| --- | --- | --- | --- | --- |
| FEW 3 | 2.18 | 1.52 | 2.93 | 0.85 |
| FEW 6 | 2.68 | 1.87 | 3.59 | 1.04 |
| TP17 Eastbound | 2.43 | 1.69 | 3.26 | 0.95 |
| AE11 Westbound | 0.80 | 0.56 | 1.07 | 0.31 |
| AE7 Eastbound | 1.17 | 0.81 | 1.56 | 0.45 |
| AE7 Westbound | 0.96 | 0.67 | 1.30 | 0.38 |
| TP17 Westbound | 1.20 | 0.84 | 1.61 | 0.47 |
| TP2 Eastbound | 1.12 | 0.78 | 1.51 | 0.44 |
| TP2 Westbound | 1.50 | 1.05 | 2.01 | 0.58 |
| IA7 | 0.96 | 0.67 | 1.30 | 0.38 |
| IA8 | 1.28 | 0.89 | 1.72 | 0.50 |
| ME Eastbound | 1.71 | 1.19 | 2.29 | 0.67 |
| ME Westbound | 1.56 | 1.09 | 2.10 | 0.61 |
| IA1 | 0.81 | 0.56 | 1.08 | 0.31 |
| IA88 | 0.81 | 0.57 | 1.09 | 0.32 |
| PH5 | 0.93 | 0.65 | 1.25 | 0.36 |

Supplementary Table 24. Average SBCC-load to ship-net-tonnage ratio at 90% capture rate for the onshore regeneration scheme

| Routes | MEA | PZ | NE-2 | DES |
| --- | --- | --- | --- | --- |
| FEW 3 | 0.58 | 0.41 | 0.78 | 0.23 |
| FEW 6 | 0.61 | 0.43 | 0.82 | 0.24 |
| TP17 Eastbound | 0.43 | 0.30 | 0.57 | 0.17 |
| AE11 Westbound | 0.22 | 0.15 | 0.29 | 0.08 |
| AE7 Eastbound | 0.31 | 0.21 | 0.41 | 0.12 |
| AE7 Westbound | 0.25 | 0.18 | 0.34 | 0.10 |
| TP17 Westbound | 0.34 | 0.24 | 0.46 | 0.13 |
| TP2 Eastbound | 0.33 | 0.23 | 0.44 | 0.13 |
| TP2 Westbound | 0.52 | 0.37 | 0.70 | 0.20 |
| IA7 | 0.35 | 0.25 | 0.47 | 0.14 |
| IA8 | 0.37 | 0.26 | 0.50 | 0.15 |
| ME Eastbound | 0.69 | 0.48 | 0.92 | 0.27 |
| ME Westbound | 0.52 | 0.36 | 0.70 | 0.20 |
| IA1 | 0.38 | 0.26 | 0.51 | 0.15 |
| IA88 | 0.32 | 0.22 | 0.43 | 0.12 |
| PH5 | 0.40 | 0.28 | 0.53 | 0.15 |

Supplementary Note 9. Fixed equipment cost for the onboard regeneration scheme

Large-scale equipment typically benefits from economies of scale as capacity increases, leading to a nonlinear reduction in cost per unit of processing capacity or per tonne of CO2 captured. In this study, the cost of shipboard carbon capture equipment was analyzed across different maximum continuous ratings (MCRs) to establish the relationship between equipment cost and engine power output.21 29 This trend is effectively captured using a logarithmic function, providing a more realistic representation of equipment manufacturing and engineering cost behavior.

Accordingly, the estimated cost of onboard carbon capture equipment per tonne of CO2 ($/tonne CO2) is given by:

Based on the MCRs of ships operating along different routes and assuming an engine load of 85% (), the costs of onboard carbon capture equipment with regeneration systems are estimated for each route.

Supplementary Table 25. Fixed equipment cost for the onboard regeneration scheme across different shipping routes

| Routes | Maximum Continuous Rating (*kw*) | 85% MCR (*kw*) | Equipment cost ($/tonne CO2) |
| --- | --- | --- | --- |
| FEW 3 | 68640 | 58344 | 25.3 |
| FEW 6 | 66220 | 56287 | 25.6 |
| TP17 Eastbound | 57100 | 48535 | 27.2 |
| AE11 Westbound | 75570 | 64234 | 24.2 |
| AE7 Eastbound | 54960 | 46716 | 27.7 |
| AE7 Westbound | 54960 | 46716 | 27.7 |
| TP17 Westbound | 68640 | 58344 | 25.3 |
| TP2 Eastbound | 72240 | 61404 | 24.7 |
| TP2 Westbound | 72240 | 61404 | 24.7 |
| IA7 | 16080 | 13668 | 40.9 |
| IA8 | 57100 | 48535 | 27.2 |
| ME Eastbound | 36560 | 31076 | 32.1 |
| ME Westbound | 36560 | 31076 | 32.1 |
| IA1 | 36560 | 31076 | 32.1 |
| IA88 | 13500 | 11475 | 42.8 |
| PH5 | 21660 | 18411 | 37.7 |

Supplementary Note 10. Fixed equipment cost for the onshore regeneration scheme

The fixed equipment cost for the onshore regeneration scheme comprises two components: the cost of the onboard absorber and the cost of onshore regeneration facility, as defined in Eq. 29.

The absorber is considered as a component of the overall SBCC system and its purchase cost is estimated to account for 4.58% of the total onboard SBCC cost,30 as shown in Supplementary Table 26.

Supplementary Table 26. Cost breakdown of the Organic Rankine Cycle (ORC)-integrated onboard CO2 capture system30

| Equipment category | Equipment | Purchase cost  (Totally: 3.24×10 6 $) | Breakdown of cost (excluding ORC and LNG cold energy reuse)[[1]](#footnote-2) |
| --- | --- | --- | --- |
| Column | Absorber | 97112.52 | **4.58%** |
| Stripper | 75420.72 | 3.55% |
| Packing | 28032.48 | 1.32% |
| Trays | 133488 | 6.29% |
| Heat exchanger | H1 | 155675.52 | 7.34% |
| H2 | 162751.68 | 7.67% |
| H3 | 148599.36 | 7.00% |
| H4 | 185749.2 | 8.75% |
| H5 | 203439.6 | 9.59% |
| H6 | 150368.4 | Excluded in our system |
| H7 | 150368.4 | Excluded in our system |
| H8 | 238820.4 | Excluded in our system |
| Reboiler | 373267.44 | 17.59% |
| Compressor and pump | C1 | 225309.6 | 10.62% |
| C2 | 192067.2 | 9.05% |
| P1 | 22161.6 | 1.04% |
| P2 | 21546 | Excluded in our system |
| P3 | 43707.6 | 2.06% |
| P4 | 31395.6 | 1.48% |
| P5 | 22161.6 | 1.04% |
| P6 | 21546 | 1.02% |
| P7 | 35089.2 | Excluded in our system |
| Turbine | Turbine | 521640 | Excluded in our system |

The cost of the onboard absorber is thereby calculated using Eq. 30 and summarized in Supplementary Table 27.

Supplementary Table 27. Cost of absorber for the onshore regeneration scheme across different shipping routes

| Routes | Onboard SBCC equipment cost ($/tonne CO2) | Absorber cost  ($/tonne CO2) |
| --- | --- | --- |
| FEW 3 | 25.3 | 1.2 |
| FEW 6 | 25.6 | 1.2 |
| TP17 Eastbound | 27.2 | 1.2 |
| AE11 Westbound | 24.2 | 1.1 |
| AE7 Eastbound | 27.7 | 1.3 |
| AE7 Westbound | 27.7 | 1.3 |
| TP17 Westbound | 25.3 | 1.2 |
| TP2 Eastbound | 24.7 | 1.1 |
| TP2 Westbound | 24.7 | 1.1 |
| IA7 | 40.9 | 1.9 |
| IA8 | 27.2 | 1.2 |
| ME Eastbound | 32.1 | 1.5 |
| ME Westbound | 32.1 | 1.5 |
| IA1 | 32.1 | 1.5 |
| IA88 | 42.8 | 2.0 |
| PH5 | 37.7 | 1.7 |

The cost of onshore facilities for solvent regeneration is estimated from a land-based carbon capture process for a steel plant (Supplementary Table 28),31 leading to the result in Eq. 31.

Supplementary Table 28. Equipment cost of the carbon capture process in a steel plant

| Equipment | Capital cost ($/tonne CO2) |
| --- | --- |
| Capital cost of heat exchanger | 4.02 |
| Other capital cost (excluding absorber and heat exchanger) | 3.79 |
| Cost of onshore facility | 7.81 |

Adding the two components together, the fixed equipment costs ($/tonne CO2) for all routes under the onshore regeneration scheme are determined and summarized in Supplementary Table 29.

Supplementary Table 29. Fixed equipment cost for the onshore regeneration scheme across different shipping routes

| Routes | Onboard absorber cost ($/tonne CO2) | Onshore  facility cost  ($/tonne CO2) | Fixed equipment cost for onshore regeneration ($/tonne CO2) |
| --- | --- | --- | --- |
| FEW 3 | 1.2 | 7.81 | 9.0 |
| FEW 6 | 1.2 | 7.81 | 9.0 |
| TP17 Eastbound | 1.2 | 7.81 | 9.1 |
| AE11 Westbound | 1.1 | 7.81 | 8.9 |
| AE7 Eastbound | 1.3 | 7.81 | 9.1 |
| AE7 Westbound | 1.3 | 7.81 | 9.1 |
| TP17 Westbound | 1.2 | 7.81 | 9.0 |
| TP2 Eastbound | 1.1 | 7.81 | 8.9 |
| TP2 Westbound | 1.1 | 7.81 | 8.9 |
| IA7 | 1.9 | 7.81 | 9.7 |
| IA8 | 1.2 | 7.81 | 9.1 |
| ME Eastbound | 1.5 | 7.81 | 9.3 |
| ME Westbound | 1.5 | 7.81 | 9.3 |
| IA1 | 1.5 | 7.81 | 9.3 |
| IA88 | 2.0 | 7.81 | 9.8 |
| PH5 | 1.7 | 7.81 | 9.5 |

Supplementary Note 11. Transportation cost

The transportation cost for each route is estimated by averaging the historical freight rates, and then converted using the following formula:

Supplementary Table 30. Freight rates and transportation cost

| Routes | Average freight rates ($/FEU*) | Transportation cost ($/tonne) |
| --- | --- | --- |
| FEW 3 | 801 | 26.3 |
| FEW 6 | 801 | 26.3 |
| TP17 Eastbound | 1222.5 | 40.1 |
| AE11 Westbound | 1000.5 | 32.8 |
| AE7 Eastbound | 1000.5 | 32.8 |
| AE7 Westbound | 1000.5 | 32.8 |
| TP17 Westbound | 1222.5 | 40.1 |
| TP2 Eastbound | 973.5 | 31.9 |
| TP2 Westbound | 973.5 | 31.9 |
| IA7 | 621.5 | 20.4 |
| IA8 | 621.5 | 20.4 |
| ME Eastbound | 695.5 | 22.8 |
| ME Westbound | 695.5 | 22.8 |
| IA1 | 621.5 | 20.4 |
| IA88 | 621.5 | 20.4 |
| PH5 | 621.5 | 20.4 |

* FEU: Forty-foot equivalent unit

Supplementary Note 12. Capture cost for the onboard regeneration scheme

Capture cost for the onboard regeneration scheme () is given by:

The fixed equipment cost is calculated in Supplementary Note 9 and the cost of regeneration and liquefaction are calculated in Supplementary Note 5. When the regeneration scheme is chosen, these costs depend only on the solvent used and are independent of the load limit. However, when calculating the cost of cargo loss, the situation becomes more complex. Different scenarios should be considered depending on the relationship between and . In the calculation of the SBCC-load-to-ship-net-tonnage ratio, the segment capture rate () is initially assumed to be 90%. However, this assumption may no longer hold once a load limit is applied.

1. <

In this case, the entire flue gas stream from the ship is processed by the SBCC system. Therefore, the segment capture rate () and the Overall capture rate () both remain at 90%. The corresponding CO2 emissions values can be obtained from Supplementary Tables 12, 13 and Data 1. The storage tank information for different solvents is presented in Supplementary Tables 15-18.

1. >

At this circumstance, at least one segment’s SBCC load exceeds the load limit. For segments where , the is still 90%. However, for segments where , the segment cannot reach 90% and must be recalculated. The SBCC load for such segments is constrained by the load limit and is given by:

As a result, the amount of CO2 captured is reduced, leading to a smaller required tank volume. Under different conditions, the tank should be pre-designed to accommodate the maximum capture requirement, which occurs at .

To achieve this, and are determined by simultaneously solving Eqs. 22, 24, 35 and 36.

The results for tank dimensions under different load limits are presented in Supplementary Tables 31-33.

Then, the segment capture rate can be recalculated as:

The segment capture rates for all routes are provided in Supplementary Data 1 (excel file).

Having the , the voyage-level overall capture rate () is calculated as:

where the total CO2 emissions over the voyage is given by:

The results of are presented in Supplementary Tables 34-36.

The cost associated with cargo loss is calculated at the segment level using：

The cost of cargo loss per tonne of captured CO2 is：

The results of cargo loss costs per tonne CO2 () using different solvents under various load limits are presented in Supplementary Tables 37-39.

Based on the calculated costs for cargo loss, fixed equipment, and regeneration and liquefaction costs, the capture cost () is then determined by Eq. 34. Supplementary Tables 40-42 summarize the results.

Supplementary Table 31. Storage tank dimensions at 10% load limit

| Routes | Weight of CO2 in tank (tonne) | Volume of storage tank (m3) | Tank length (m) | Tank diameter (m) | Tank weight (tonne) |
| --- | --- | --- | --- | --- | --- |
| FEW 3 | 4027.1 | 3753.1 | 46.3 | 9.8 | 2431.6 |
| FEW 6 | 3306.8 | 3081.9 | 40.9 | 9.4 | 2238.3 |
| TP17 Eastbound | 3267.2 | 3044.9 | 41.3 | 9.3 | 2221.2 |
| AE11 Westbound | 9567.5 | 8916.6 | 59.5 | 13.3 | 3686.9 |
| AE7 Eastbound | 5182.4 | 4829.8 | 49.1 | 10.8 | 2745.1 |
| AE7 Westbound | 5235.8 | 4879.6 | 51.5 | 10.6 | 2744.8 |
| TP17 Westbound | 5612.4 | 5230.6 | 41.2 | 12.1 | 2925.4 |
| TP2 Eastbound | 6037.2 | 5626.4 | 49.3 | 11.6 | 2966.1 |
| TP2 Westbound | 6037.2 | 5626.4 | 49.3 | 11.6 | 2966.1 |
| IA7 | 423.8 | 395.0 | 33.6 | 3.8 | 821.4 |
| IA8 | 1999.9 | 1863.8 | 38.0 | 7.7 | 1755.0 |
| ME Eastbound | 1066.1 | 993.6 | 30.2 | 6.3 | 1334.0 |
| ME Westbound | 1066.1 | 993.6 | 30.2 | 6.3 | 1334.0 |
| IA1 | 1151.3 | 1072.9 | 30.2 | 6.5 | 1386.5 |
| IA88 | 199.2 | 185.7 | 30.2 | 2.8 | 575.0 |
| PH5 | 431.4 | 402.0 | 27.0 | 4.2 | 868.2 |

Supplementary Table 32. Storage tank dimensions at 20% load limit

| Routes | Weight of CO2 in tank (tonne) | Volume of storage tank (m3) | Tank length (m) | Tank diameter (m) | Tank weight (tonne) |
| --- | --- | --- | --- | --- | --- |
| FEW 3 | 9208.4 | 8581.9 | 46.3 | 14.6 | 3709.0 |
| FEW 6 | 7658.0 | 7137.0 | 40.9 | 14.1 | 3432.2 |
| TP17 Eastbound | 7569.9 | 7054.9 | 41.3 | 14.0 | 3406.9 |
| AE11 Westbound | 20981.5 | 19554.1 | 59.5 | 19.4 | 5527.3 |
| AE7 Eastbound | 11691.7 | 10896.3 | 49.1 | 16.0 | 4163.3 |
| AE7 Westbound | 11800.0 | 10997.2 | 51.5 | 15.7 | 4161.2 |
| TP17 Westbound | 12643.5 | 11783.3 | 41.2 | 17.8 | 4432.1 |
| TP2 Eastbound | 13521.7 | 12601.8 | 49.3 | 17.1 | 4484.9 |
| TP2 Westbound | 13521.7 | 12601.8 | 49.3 | 17.1 | 4484.9 |
| IA7 | 1139.7 | 1062.2 | 33.6 | 6.2 | 1350.7 |
| IA8 | 4780.3 | 4455.1 | 38.0 | 11.6 | 2729.5 |
| ME Eastbound | 2679.0 | 2496.7 | 30.2 | 9.8 | 2121.2 |
| ME Westbound | 2679.0 | 2496.7 | 30.2 | 9.8 | 2121.2 |
| IA1 | 2876.8 | 2681.1 | 30.2 | 10.1 | 2198.8 |
| IA88 | 572.3 | 533.4 | 30.2 | 4.6 | 976.1 |
| PH5 | 1168.5 | 1089.0 | 27.0 | 6.9 | 1430.7 |

Supplementary Table 33. Storage tank dimensions at 30% load limit

| Routes | Weight of CO2 in tank (tonne) | Volume of storage tank (m3) | Tank length (m) | Tank diameter (m) | Tank weight (tonne) |
| --- | --- | --- | --- | --- | --- |
| FEW 3 | 14665.0 | 13667.2 | 46.3 | 18.2 | 4711.1 |
| FEW 6 | 12266.5 | 11432.0 | 40.9 | 17.7 | 4368.8 |
| TP17 Eastbound | 12128.1 | 11302.9 | 41.3 | 17.5 | 4337.1 |
| AE11 Westbound | 32790.7 | 30559.8 | 59.5 | 24.0 | 6972.5 |
| AE7 Eastbound | 18506.7 | 17247.6 | 49.1 | 19.9 | 5275.8 |
| AE7 Westbound | 18669.4 | 17399.3 | 51.5 | 19.5 | 5272.4 |
| TP17 Westbound | 20000.2 | 18639.5 | 41.2 | 22.1 | 5613.2 |
| TP2 Eastbound | 21333.6 | 19882.2 | 49.3 | 21.2 | 5676.3 |
| TP2 Westbound | 21333.6 | 19882.2 | 49.3 | 21.2 | 5676.3 |
| IA7 | 1960.3 | 1826.9 | 33.6 | 8.0 | 1775.3 |
| IA8 | 7769.2 | 7240.6 | 38.0 | 14.7 | 3495.5 |
| ME Eastbound | 4457.3 | 4154.1 | 30.2 | 12.4 | 2743.0 |
| ME Westbound | 4457.3 | 4154.1 | 30.2 | 12.4 | 2743.0 |
| IA1 | 4773.6 | 4448.9 | 30.2 | 12.8 | 2839.8 |
| IA88 | 1018.7 | 949.4 | 30.2 | 6.1 | 1303.9 |
| PH5 | 2017.1 | 1879.9 | 27.0 | 8.9 | 1881.7 |

Supplementary Table 34. Overall capture rate for the onboard regeneration scheme at 10% load limit

| Routes | MEA | PZ | NE-2 | DES |
| --- | --- | --- | --- | --- |
| FEW 3 | 56% | 57% | 58% | 57% |
| FEW 6 | 52% | 53% | 55% | 53% |
| TP17 Eastbound | 58% | 56% | 55% | 56% |
| AE11 Westbound | 82% | 83% | 84% | 83% |
| AE7 Eastbound | 72% | 75% | 76% | 75% |
| AE7 Westbound | 79% | 79% | 79% | 79% |
| TP17 Westbound | 68% | 69% | 69% | 69% |
| TP2 Eastbound | 62% | 62% | 63% | 62% |
| TP2 Westbound | 54% | 55% | 55% | 55% |
| IA7 | 52% | 54% | 55% | 54% |
| IA8 | 66% | 68% | 70% | 68% |
| ME Eastbound | 34% | 34% | 34% | 34% |
| ME Westbound | 43% | 43% | 44% | 43% |
| IA1 | 68% | 70% | 73% | 70% |
| IA88 | 51% | 52% | 51% | 52% |
| PH5 | 45% | 47% | 48% | 47% |

Supplementary Table 35. Overall capture rate for the onboard regeneration scheme at 20% load limit

| Routes | MEA | PZ | NE-2 | DES |
| --- | --- | --- | --- | --- |
| FEW 3 | 73% | 73% | 74% | 73% |
| FEW 6 | 71% | 71% | 71% | 71% |
| TP17 Eastbound | 67% | 66% | 67% | 66% |
| AE11 Westbound | 90% | 90% | 90% | 90% |
| AE7 Eastbound | 86% | 88% | 89% | 88% |
| AE7 Westbound | 88% | 90% | 90% | 90% |
| TP17 Westbound | 85% | 87% | 89% | 87% |
| TP2 Eastbound | 82% | 87% | 90% | 87% |
| TP2 Westbound | 77% | 81% | 82% | 81% |
| IA7 | 81% | 84% | 86% | 84% |
| IA8 | 85% | 86% | 87% | 86% |
| ME Eastbound | 61% | 63% | 65% | 63% |
| ME Westbound | 72% | 73% | 74% | 73% |
| IA1 | 89% | 90% | 90% | 90% |
| IA88 | 76% | 78% | 80% | 78% |
| PH5 | 80% | 84% | 86% | 84% |

Supplementary Table 36. Overall capture rate for the onboard regeneration scheme at 30% load limit

| Routes | MEA | PZ | NE-2 | DES |
| --- | --- | --- | --- | --- |
| FEW 3 | 81% | 83% | 85% | 83% |
| FEW 6 | 77% | 78% | 79% | 78% |
| TP17 Eastbound | 75% | 76% | 78% | 76% |
| AE11 Westbound | 90% | 90% | 90% | 90% |
| AE7 Eastbound | 90% | 90% | 90% | 90% |
| AE7 Westbound | 90% | 90% | 90% | 90% |
| TP17 Westbound | 90% | 90% | 90% | 90% |
| TP2 Eastbound | 90% | 90% | 90% | 90% |
| TP2 Westbound | 88% | 90% | 90% | 90% |
| IA7 | 90% | 90% | 90% | 90% |
| IA8 | 90% | 90% | 90% | 90% |
| ME Eastbound | 77% | 82% | 85% | 82% |
| ME Westbound | 82% | 85% | 87% | 85% |
| IA1 | 90% | 90% | 90% | 90% |
| IA88 | 89% | 90% | 90% | 90% |
| PH5 | 90% | 90% | 90% | 90% |

Supplementary Table 37. Cost of cargo loss per tonne of CO2 for the onboard regeneration scheme at 10% load limit ($/tonne CO2)

| Routes | MEA | PZ | NE-2 | DES |
| --- | --- | --- | --- | --- |
| FEW 3 | 43.8 | 44.6 | 45.2 | 44.6 |
| FEW 6 | 45.5 | 46.1 | 46.5 | 46.1 |
| TP17 Eastbound | 73.9 | 76.8 | 79.0 | 76.8 |
| AE11 Westbound | 57.5 | 61.1 | 63.7 | 61.1 |
| AE7 Eastbound | 58.1 | 60.4 | 62.5 | 60.4 |
| AE7 Westbound | 60.5 | 64.4 | 67.1 | 64.4 |
| TP17 Westbound | 69.2 | 72.3 | 74.4 | 72.3 |
| TP2 Eastbound | 54.0 | 56.0 | 57.4 | 56.0 |
| TP2 Westbound | 50.2 | 51.3 | 52.0 | 51.3 |
| IA7 | 61.4 | 62.1 | 63.0 | 62.1 |
| IA8 | 40.7 | 41.8 | 42.7 | 41.8 |
| ME Eastbound | 53.1 | 53.7 | 54.1 | 53.7 |
| ME Westbound | 53.6 | 54.4 | 55.0 | 54.4 |
| IA1 | 45.5 | 46.8 | 47.6 | 46.8 |
| IA88 | 79.2 | 80.8 | 82.6 | 80.8 |
| PH5 | 62.1 | 62.6 | 63.0 | 62.6 |

Supplementary Table 38. Cost of cargo loss per tonne of CO2 for the onboard regeneration scheme at 20% load limit ($/tonne CO2)

| Routes | MEA | PZ | NE-2 | DES |
| --- | --- | --- | --- | --- |
| FEW 3 | 43.6 | 45.8 | 47.3 | 45.8 |
| FEW 6 | 44.2 | 46.2 | 47.8 | 46.2 |
| TP17 Eastbound | 78.0 | 82.9 | 86.3 | 82.9 |
| AE11 Westbound | 67.1 | 73.1 | 77.4 | 73.1 |
| AE7 Eastbound | 64.2 | 69.1 | 72.6 | 69.1 |
| AE7 Westbound | 70.1 | 76.3 | 80.9 | 76.3 |
| TP17 Westbound | 74.3 | 79.4 | 83.1 | 79.4 |
| TP2 Eastbound | 56.3 | 59.4 | 61.7 | 59.4 |
| TP2 Westbound | 49.3 | 51.1 | 52.6 | 51.1 |
| IA7 | 55.3 | 59.3 | 62.4 | 59.3 |
| IA8 | 42.1 | 45.4 | 47.8 | 45.4 |
| ME Eastbound | 45.4 | 46.8 | 47.8 | 46.8 |
| ME Westbound | 47.4 | 49.8 | 51.7 | 49.8 |
| IA1 | 46.7 | 51.0 | 54.2 | 51.0 |
| IA88 | 71.7 | 77.0 | 81.0 | 77.0 |
| PH5 | 50.8 | 53.1 | 55.7 | 53.1 |

Supplementary Table 39. Cost of cargo loss per tonne of CO2 for the onboard regeneration scheme at 30% load limit ($/tonne CO2)

| Routes | MEA | PZ | NE-2 | DES |
| --- | --- | --- | --- | --- |
| FEW 3 | 45.9 | 48.7 | 50.6 | 48.7 |
| FEW 6 | 46.4 | 49.2 | 51.2 | 49.2 |
| TP17 Eastbound | 83.5 | 89.6 | 94.0 | 89.6 |
| AE11 Westbound | 76.0 | 83.6 | 89.0 | 83.6 |
| AE7 Eastbound | 71.5 | 78.3 | 83.1 | 78.3 |
| AE7 Westbound | 79.7 | 87.9 | 93.7 | 87.9 |
| TP17 Westbound | 81.8 | 89.1 | 94.3 | 89.1 |
| TP2 Eastbound | 60.9 | 66.0 | 69.6 | 66.0 |
| TP2 Westbound | 51.2 | 54.3 | 56.6 | 54.3 |
| IA7 | 61.4 | 68.5 | 73.5 | 68.5 |
| IA8 | 46.9 | 51.5 | 54.8 | 51.5 |
| ME Eastbound | 44.7 | 46.7 | 48.1 | 46.7 |
| ME Westbound | 49.6 | 53.1 | 55.6 | 53.1 |
| IA1 | 53.9 | 59.8 | 64.0 | 59.8 |
| IA88 | 78.1 | 87.7 | 94.8 | 87.7 |
| PH5 | 54.6 | 60.5 | 64.7 | 60.5 |

Supplementary Table 40. Capture cost for the onboard regeneration scheme at 10% load limit ($/tonne CO2)

| Routes | MEA | PZ | NE-2 | DES |
| --- | --- | --- | --- | --- |
| FEW 3 | 144.57 | 127.13 | 114.81 | 127.13 |
| FEW 6 | 146.65 | 128.97 | 116.53 | 128.97 |
| TP17 Eastbound | 176.58 | 161.30 | 150.64 | 161.30 |
| AE11 Westbound | 157.17 | 142.59 | 132.27 | 142.59 |
| AE7 Eastbound | 161.27 | 145.32 | 134.46 | 145.32 |
| AE7 Westbound | 163.62 | 149.29 | 139.15 | 149.29 |
| TP17 Westbound | 169.94 | 154.76 | 144.02 | 154.76 |
| TP2 Eastbound | 154.19 | 137.96 | 126.47 | 137.96 |
| TP2 Westbound | 150.41 | 133.23 | 121.06 | 133.23 |
| IA7 | 177.86 | 160.29 | 148.26 | 160.29 |
| IA8 | 143.39 | 126.33 | 114.25 | 126.33 |
| ME Eastbound | 160.59 | 143.01 | 130.56 | 143.01 |
| ME Westbound | 161.13 | 143.75 | 131.44 | 143.75 |
| IA1 | 153.08 | 136.09 | 124.06 | 136.09 |
| IA88 | 197.55 | 180.88 | 169.74 | 180.88 |
| PH5 | 175.30 | 157.62 | 145.11 | 157.62 |

Supplementary Table 41. Capture cost for the onboard regeneration scheme at 20% load limit ($/tonne CO2)

| Routes | MEA | PZ | NE-2 | DES |
| --- | --- | --- | --- | --- |
| FEW 3 | 144.37 | 128.31 | 116.94 | 128.31 |
| FEW 6 | 145.27 | 129.12 | 117.78 | 129.12 |
| TP17 Eastbound | 180.74 | 167.38 | 157.92 | 167.38 |
| AE11 Westbound | 164.01 | 148.35 | 137.15 | 148.35 |
| AE7 Eastbound | 167.38 | 154.03 | 144.57 | 154.03 |
| AE7 Westbound | 173.27 | 159.72 | 148.93 | 159.72 |
| TP17 Westbound | 175.05 | 161.95 | 152.73 | 161.95 |
| TP2 Eastbound | 156.53 | 141.32 | 130.32 | 141.32 |
| TP2 Westbound | 149.45 | 133.05 | 121.64 | 133.05 |
| IA7 | 171.70 | 157.51 | 147.70 | 157.51 |
| IA8 | 144.79 | 129.93 | 119.41 | 129.93 |
| ME Eastbound | 152.99 | 136.08 | 124.26 | 136.08 |
| ME Westbound | 154.98 | 139.16 | 128.16 | 139.16 |
| IA1 | 154.29 | 140.57 | 129.24 | 140.57 |
| IA88 | 190.01 | 177.12 | 168.22 | 177.12 |
| PH5 | 163.96 | 148.09 | 137.77 | 148.09 |

Supplementary Table 42. Capture cost for the onboard regeneration scheme at 30% load limit ($/tonne CO2)

| Routes | MEA | PZ | NE-2 | DES |
| --- | --- | --- | --- | --- |
| FEW 3 | 146.68 | 131.20 | 120.24 | 131.20 |
| FEW 6 | 147.52 | 132.11 | 121.20 | 132.11 |
| TP17 Eastbound | 186.19 | 174.15 | 165.63 | 174.15 |
| AE11 Westbound | 164.01 | 148.35 | 137.15 | 148.35 |
| AE7 Eastbound | 171.30 | 155.96 | 144.97 | 155.96 |
| AE7 Westbound | 174.78 | 159.72 | 148.93 | 159.72 |
| TP17 Westbound | 179.51 | 164.44 | 153.63 | 164.44 |
| TP2 Eastbound | 157.95 | 141.83 | 130.32 | 141.83 |
| TP2 Westbound | 151.75 | 135.11 | 123.27 | 135.11 |
| IA7 | 178.36 | 163.60 | 153.00 | 163.60 |
| IA8 | 150.11 | 134.11 | 122.68 | 134.11 |
| ME Eastbound | 152.27 | 136.02 | 124.56 | 136.02 |
| ME Westbound | 157.17 | 142.42 | 131.98 | 142.42 |
| IA1 | 156.42 | 140.57 | 129.24 | 140.57 |
| IA88 | 197.13 | 183.81 | 174.15 | 183.81 |
| PH5 | 167.94 | 152.60 | 141.61 | 152.60 |

Supplementary Note 13. Capture cost for the onshore regeneration scheme

Capture cost for the onshore regeneration scheme () is given by:

The fixed equipment cost is calculated in Supplementary Note 10 and the regeneration and liquefaction costs are calculated in Supplementary Note 5. Similar to the onboard regeneration scheme, different scenarios must be considered when calculating . However, the calculation is much simpler because the storage tank is not included in the onshore regeneration case. Additionally, based on our calculation, for all routes are larger than the three selected . Therefore, only the relationship of and is discussed.

For onshore regeneration, the SBCC load per segment is calculated by Eq. 27.

1. <

In this case, the segment capture rate () is fixed at 90%. The values of can be obtained from Supplementary Table 4.

1. >

The segment capture rate is constrained by the available cargo capacity. The SBCC load is determined by:

In this case, the segment capture rate is recalculated as:

The calculation of voyage-level overall capture rate () and total CO₂ emissions over the voyage for onshore regeneration scheme is same as the onboard scheme (Eq. 38 and 39). Supplementary Tables 43-45 show the results of .

Supplementary Table 43. Overall capture rate for the onshore regeneration scheme at 10% load limit

| Routes | MEA | PZ | NE-2 | DES |
| --- | --- | --- | --- | --- |
| FEW 3 | 14% | 20% | 11% | 34% |
| FEW 6 | 13% | 18% | 10% | 30% |
| TP17 Eastbound | 19% | 26% | 14% | 40% |
| AE11 Westbound | 35% | 48% | 27% | 71% |
| AE7 Eastbound | 26% | 35% | 20% | 50% |
| AE7 Westbound | 33% | 45% | 24% | 63% |
| TP17 Westbound | 23% | 31% | 18% | 48% |
| TP2 Eastbound | 20% | 27% | 16% | 43% |
| TP2 Westbound | 14% | 20% | 11% | 33% |
| IA7 | 21% | 29% | 16% | 48% |
| IA8 | 21% | 30% | 16% | 47% |
| ME Eastbound | 11% | 16% | 8% | 23% |
| ME Westbound | 14% | 20% | 11% | 30% |
| IA1 | 22% | 32% | 17% | 55% |
| IA88 | 25% | 36% | 19% | 51% |
| PH5 | 17% | 25% | 13% | 41% |

Supplementary Table 44. Overall capture rate for the onshore regeneration scheme at 20% load limit

| Routes | MEA | PZ | NE-2 | DES |
| --- | --- | --- | --- | --- |
| FEW 3 | 28% | 37% | 21% | 54% |
| FEW 6 | 24% | 33% | 19% | 51% |
| TP17 Eastbound | 35% | 42% | 27% | 50% |
| AE11 Westbound | 63% | 72% | 50% | 80% |
| AE7 Eastbound | 43% | 53% | 36% | 72% |
| AE7 Westbound | 55% | 66% | 46% | 77% |
| TP17 Westbound | 41% | 51% | 32% | 64% |
| TP2 Eastbound | 37% | 44% | 28% | 57% |
| TP2 Westbound | 27% | 35% | 21% | 49% |
| IA7 | 39% | 52% | 30% | 74% |
| IA8 | 39% | 52% | 31% | 72% |
| ME Eastbound | 19% | 25% | 16% | 40% |
| ME Westbound | 25% | 33% | 21% | 52% |
| IA1 | 43% | 60% | 33% | 82% |
| IA88 | 45% | 55% | 38% | 74% |
| PH5 | 33% | 45% | 26% | 72% |

Supplementary Table 45. Overall capture rate for the onshore regeneration scheme at 30% load limit

| Routes | MEA | PZ | NE-2 | DES |
| --- | --- | --- | --- | --- |
| FEW 3 | 38% | 48% | 30% | 63% |
| FEW 6 | 34% | 46% | 26% | 60% |
| TP17 Eastbound | 43% | 48% | 37% | 55% |
| AE11 Westbound | 73% | 77% | 67% | 89% |
| AE7 Eastbound | 54% | 67% | 46% | 80% |
| AE7 Westbound | 68% | 74% | 58% | 84% |
| TP17 Westbound | 52% | 60% | 45% | 76% |
| TP2 Eastbound | 45% | 52% | 41% | 71% |
| TP2 Westbound | 36% | 44% | 30% | 63% |
| IA7 | 54% | 67% | 43% | 86% |
| IA8 | 53% | 67% | 42% | 82% |
| ME Eastbound | 26% | 34% | 21% | 55% |
| ME Westbound | 34% | 45% | 27% | 67% |
| IA1 | 62% | 77% | 48% | 89% |
| IA88 | 56% | 67% | 48% | 88% |
| PH5 | 47% | 63% | 37% | 87% |

The cost of cargo loss per segment is calculated as:

The cost of cargo loss per tonne of captured CO2 is:

The results for using different solvents under various load limits are presented in Supplementary Tables 46. It can be observed that the cargo loss cost is invariant with respect to the load limit. This is because, in the onshore regeneration scheme, all terms on the right hand of Eq. 42 are proportional to , due to the absence of additional emissions () and the exclusion of tank weight.

Based on the calculated costs for cargo loss, fixed equipment, regeneration and liquefaction, the capture cost () is then determined using Eq. 42 and presented in Supplementary Tables 47. It remains constant across different load limits depends solely on the solvent type and ship characteristics.

Supplementary Table 46. Cost of cargo loss for the onshore regeneration scheme at 10%, 20% and 30% load limits ($/tonne CO2)

| Routes | MEA | PZ | NE-2 | DES |
| --- | --- | --- | --- | --- |
| FEW 3 | 270.7 | 189.2 | 362.7 | 105.1 |
| FEW 6 | 270.7 | 189.2 | 362.7 | 105.1 |
| TP17 Eastbound | 413.1 | 288.8 | 553.5 | 160.4 |
| AE11 Westbound | 338.1 | 236.3 | 453.0 | 131.3 |
| AE7 Eastbound | 338.1 | 236.3 | 453.0 | 131.3 |
| AE7 Westbound | 338.1 | 236.3 | 453.0 | 131.3 |
| TP17 Westbound | 413.1 | 288.8 | 553.5 | 160.4 |
| TP2 Eastbound | 329.0 | 230.0 | 440.8 | 127.8 |
| TP2 Westbound | 329.0 | 230.0 | 440.8 | 127.8 |
| IA7 | 210.0 | 146.8 | 281.4 | 81.6 |
| IA8 | 210.0 | 146.8 | 281.4 | 81.6 |
| ME Eastbound | 235.0 | 164.3 | 314.9 | 91.3 |
| ME Westbound | 235.0 | 164.3 | 314.9 | 91.3 |
| IA1 | 210.0 | 146.8 | 281.4 | 81.6 |
| IA88 | 210.0 | 146.8 | 281.4 | 81.6 |
| PH5 | 210.0 | 146.8 | 281.4 | 81.6 |

Supplementary Table 47. Capture cost for the onshore regeneration scheme at 10%, 20% and 30% load limits ($/tonne CO2)

| Routes | MEA | PZ | NE-2 | DES |
| --- | --- | --- | --- | --- |
| FEW 3 | 303.55 | 219.25 | 390.87 | 135.22 |
| FEW 6 | 303.56 | 219.26 | 390.89 | 135.24 |
| TP17 Eastbound | 446.07 | 318.90 | 581.80 | 190.63 |
| AE11 Westbound | 370.91 | 266.32 | 481.15 | 161.35 |
| AE7 Eastbound | 371.07 | 266.48 | 481.31 | 161.51 |
| AE7 Westbound | 371.07 | 266.48 | 481.31 | 161.51 |
| TP17 Westbound | 445.98 | 318.81 | 581.71 | 190.54 |
| TP2 Eastbound | 361.81 | 259.97 | 468.95 | 157.83 |
| TP2 Westbound | 361.81 | 259.97 | 468.95 | 157.83 |
| IA7 | 243.61 | 177.56 | 310.32 | 112.38 |
| IA8 | 242.98 | 176.94 | 309.69 | 111.76 |
| ME Eastbound | 268.21 | 194.64 | 343.42 | 121.69 |
| ME Westbound | 268.21 | 194.64 | 343.42 | 121.69 |
| IA1 | 243.20 | 177.16 | 309.91 | 111.98 |
| IA88 | 243.69 | 177.65 | 310.41 | 112.47 |
| PH5 | 243.46 | 177.41 | 310.17 | 112.23 |

Supplementary Note 14. 2030–2050 Carbon tax and emission factors

1. 2030–2050 Carbon tax prediction

The global carbon tax (Supplementary Table 49) is estimated based on the global CO2 emissions under the “Net Zero Emissions by 2050”Scenario (Supplementary Table 48), 32,33 by considering each region’s share of emissions and their corresponding carbon tax. This weighted approach reflects regional emission disparities and provides a tax estimate suitable for global shipping applications. As a result, the projected global carbon taxes for 2030, 2040, and 2050 are $102.2, $168.8, and $205.9 per tonne of CO₂, respectively.

Supplementary Table 48. Global CO2 emission ratios under the “Net Zero Emissions by 2050” Scenario

| Region | 2030 | 2040 | 2050 |
| --- | --- | --- | --- |
| Advanced economies | 0.244 | 0.195 | 0.117 |
| Emerging markets and developing economies | 0.756 | 0.805 | 0.883 |

Supplementary Table 49. Carbon tax estimates under the “Net Zero Emissions by 2050” Scenario

| Region | 2030 | 2040 | 2050 |
| --- | --- | --- | --- |
| Advanced economies | 140.0 | 205.0 | 250.0 |
| Emerging markets and developing economies | 90.0 | 160.0 | 200.0 |
| Global ($/tonne CO2) | **102.2** | **168.8** | **205.9** |

1. 2030–2050 emission factors prediction

For onshore regeneration schemes, carbon emissions are calculated using land-based emission factors, as both regeneration and liquefaction occur on land. The process involves steam for regeneration and electricity for liquefaction. Supplementary Table 50 summarizes the global electricity emission factors () for 2030, 2040, and 2050.32

Supplementary Table 50. Global electricity emission factor (g CO2/kwh)

| Year | 2030 | 2040 | 2050 |
| --- | --- | --- | --- |
|  | 270 | 149.5 | 29 |

The global steam emission factors () are estimated for 2030–2050 by weighting regional steam emission factors (Supplementary Table 51)34 with industrial energy consumption ratios (Supplementary Table 52) 35-37.

Supplementary Table 51. Regional steam emission factors (g CO2/kwh)

| Region | 2030 | 2040 | 2050 |
| --- | --- | --- | --- |
| EU | 204.4 | 107.1 | 9.8 |
| US | 231.4 | 122.4 | 13.3 |
| CN | 286.4 | 151.0 | 15.6 |

Supplementary Table 52. Proportions of industrial energy consumption in different regions

| Region | Industrial energy consumption (Terajoule) |  |
| --- | --- | --- |
| EU | 13030539 | 17.30% |
| US | 15046051 | 19.97% |
| CN | 47260869 | 62.73% |

is estimated as:

The results are shown in Supplementary Table 53.

Supplementary Table 53. Global steam emission factors (g CO2/kwh)

| Year | 2030 | 2040 | 2050 |
| --- | --- | --- | --- |
|  | 261.2 | 137.7 | 14.1 |

Finally, the onshore-regeneration emission factor () is calculated using:

is the regeneration energy consumption (GJ/tonne CO2),

is the global steam emission factor (g CO2/kwh),

is the liquefaction energy consumption (GJ/tonne CO2),

is the global electricity emission factor (g CO2/kwh),

is the energy unit transfer factor with a value of .

The for each solvent and year scenarios are summarized in Supplementary Table 54.

Supplementary Table 54. Onshore-regeneration emission factors (OEF)
(Unit: tonne CO2 emitted / tonne CO2 captured)

| Year | 2030 | 2040 | 2050 |
| --- | --- | --- | --- |
| MEA | 0.39 | 0.21 | 0.02 |
| PZ | 0.28 | 0.15 | 0.02 |
| NE-2 | 0.21 | 0.11 | 0.01 |
| DES | 0.28 | 0.15 | 0.02 |

Supplementary Note 15. Total Cost with Carbon Tax (TCT) for onboard regeneration

For the onboard regeneration scheme, the total cost with carbon tax is calculated using the following equation:

where is the carbon tax.

The corresponding results under different routes, solvents, weight limits, and carbon tax scenarios (2030, 2040, 2050) are summarized in Supplementary Tables 55–63.

Supplementary Table 55. Total cost ($) for onboard regeneration scheme at 10% load limit under 2030 carbon tax

| Routes | MEA | PZ | NE-2 | DES |
| --- | --- | --- | --- | --- |
| IA88 | 944975.91 | 835822.63 | 762607.56 | 835822.63 |
| PH5 | 1238817.74 | 1108726.04 | 1021406.95 | 1108726.04 |
| IA7 | 1063109.66 | 942552.25 | 857158.07 | 942552.25 |
| ME Eastbound | 1558250.91 | 1418307.19 | 1326875.13 | 1418307.19 |
| ME Westbound | 1295956.00 | 1156772.56 | 1065861.15 | 1156772.56 |
| IA1 | 3121534.24 | 2611738.98 | 2291177.13 | 2611738.98 |
| IA8 | 4525748.15 | 3787161.15 | 3319522.33 | 3787161.15 |
| TP17 Westbound | 7591737.12 | 6341528.16 | 5611721.78 | 6341528.16 |
| FEW 6 | 6077771.31 | 5296404.64 | 4769482.67 | 5296404.64 |
| TP17 Eastbound | 5043388.90 | 4294310.32 | 3852971.90 | 4294310.32 |
| FEW 3 | 10418362.34 | 8927122.41 | 7968588.29 | 8927122.41 |
| TP2 Westbound | 5279276.11 | 4535651.08 | 4074030.07 | 4535651.08 |
| TP2 Eastbound | 3040153.54 | 2565808.55 | 2280102.78 | 2565808.55 |
| AE7 Westbound | 6266283.33 | 5069915.00 | 4396297.05 | 5069915.00 |
| AE7 Eastbound | 6934278.63 | 5814269.68 | 5069627.02 | 5814269.68 |
| AE11 Westbound | 8968143.84 | 7198914.69 | 6194646.21 | 7198914.69 |

Supplementary Table 56. Total cost ($) for onboard regeneration scheme at 10% load limit under 2040 carbon tax

| Routes | MEA | PZ | NE-2 | DES |
| --- | --- | --- | --- | --- |
| IA88 | 1150411.88 | 1024449.06 | 942654.16 | 1024449.06 |
| PH5 | 1574020.29 | 1417209.08 | 1311096.69 | 1417209.08 |
| IA7 | 1304273.02 | 1157644.70 | 1057227.00 | 1157644.70 |
| ME Eastbound | 2118548.90 | 1953267.41 | 1844104.97 | 1953267.41 |
| ME Westbound | 1683824.07 | 1519302.87 | 1410661.09 | 1519302.87 |
| IA1 | 3605697.80 | 3019604.69 | 2646170.02 | 3019604.69 |
| IA8 | 5327398.83 | 4473541.57 | 3925918.84 | 4473541.57 |
| TP17 Westbound | 8664807.39 | 7303867.36 | 6499960.46 | 7303867.36 |
| FEW 6 | 7644285.68 | 6707866.41 | 6081896.67 | 6707866.41 |
| TP17 Eastbound | 6027299.90 | 5223202.65 | 4754182.09 | 5223202.65 |
| FEW 3 | 12849499.07 | 11115478.14 | 9995721.60 | 11115478.14 |
| TP2 Westbound | 6533429.95 | 5687641.46 | 5155540.76 | 5687641.46 |
| TP2 Eastbound | 3615244.43 | 3086675.83 | 2764019.32 | 3086675.83 |
| AE7 Westbound | 6840986.55 | 5574625.63 | 4856455.43 | 5574625.63 |
| AE7 Eastbound | 7820530.88 | 6532167.99 | 5716691.55 | 6532167.99 |
| AE11 Westbound | 9692058.45 | 7806140.06 | 6726564.49 | 7806140.06 |

Supplementary Table 57. Total cost ($) for onboard regeneration scheme at 10% load limit under 2050 carbon tax

| Routes | MEA | PZ | NE-2 | DES |
| --- | --- | --- | --- | --- |
| IA88 | 1264847.47 | 1129521.10 | 1042946.91 | 1129521.10 |
| PH5 | 1760740.76 | 1589045.78 | 1472464.81 | 1589045.78 |
| IA7 | 1438610.12 | 1277459.32 | 1168672.95 | 1277459.32 |
| ME Eastbound | 2430656.03 | 2251260.44 | 2132221.52 | 2251260.44 |
| ME Westbound | 1899881.23 | 1721245.93 | 1602727.67 | 1721245.93 |
| IA1 | 3875395.17 | 3246801.29 | 2843914.46 | 3246801.29 |
| IA8 | 5773948.52 | 4855881.36 | 4263704.58 | 4855881.36 |
| TP17 Westbound | 9262548.02 | 7839926.60 | 6994742.92 | 7839926.60 |
| FEW 6 | 8516893.30 | 7494103.89 | 6812960.80 | 7494103.89 |
| TP17 Eastbound | 6575375.45 | 5740630.73 | 5256190.17 | 5740630.73 |
| FEW 3 | 14203733.98 | 12334474.86 | 11124911.36 | 12334474.86 |
| TP2 Westbound | 7232040.96 | 6329343.58 | 5757983.03 | 6329343.58 |
| TP2 Eastbound | 3935591.76 | 3376818.57 | 3033579.09 | 3376818.57 |
| AE7 Westbound | 7161117.93 | 5855768.49 | 5112781.02 | 5855768.49 |
| AE7 Eastbound | 8314206.82 | 6932064.44 | 6077130.91 | 6932064.44 |
| AE11 Westbound | 10095306.21 | 8144387.51 | 7022863.05 | 8144387.51 |

Supplementary Table 58. Total cost ($) for onboard regeneration scheme at 20% load limit under 2030 carbon tax

| Routes | MEA | PZ | NE-2 | DES |
| --- | --- | --- | --- | --- |
| IA88 | 1251278.66 | 1064630.05 | 950112.89 | 1064630.05 |
| PH5 | 1752902.68 | 1455140.38 | 1255108.11 | 1455140.38 |
| IA7 | 1458095.66 | 1204619.83 | 1050537.87 | 1204619.83 |
| ME Eastbound | 2002360.79 | 1712521.97 | 1520466.97 | 1712521.97 |
| ME Westbound | 1717980.08 | 1422077.18 | 1239667.96 | 1422077.18 |
| IA1 | 3944332.97 | 3117409.52 | 2612633.29 | 3117409.52 |
| IA8 | 5592650.70 | 4400004.78 | 3729929.16 | 4400004.78 |
| TP17 Westbound | 9467977.16 | 7762336.87 | 6764231.00 | 7762336.87 |
| FEW 6 | 7336749.24 | 5986411.35 | 5186114.25 | 5986411.35 |
| TP17 Eastbound | 5711707.44 | 4839008.07 | 4332963.90 | 4839008.07 |
| FEW 3 | 12374840.61 | 10031438.61 | 8672252.58 | 10031438.61 |
| TP2 Westbound | 6681225.86 | 5473018.77 | 4694878.98 | 5473018.77 |
| TP2 Eastbound | 3837612.21 | 3173335.02 | 2724781.08 | 3173335.02 |
| AE7 Westbound | 7364061.80 | 5913825.50 | 5010427.24 | 5913825.50 |
| AE7 Eastbound | 8371875.66 | 6796866.38 | 5891625.09 | 6796866.38 |
| AE11 Westbound | 10216912.83 | 7913874.02 | 6654622.72 | 7913874.02 |

Supplementary Table 59. Total cost ($) for onboard regeneration scheme at 20% load limit under 2040 carbon tax

| Routes | MEA | PZ | NE-2 | DES |
| --- | --- | --- | --- | --- |
| IA88 | 1370440.78 | 1160510.33 | 1031751.36 | 1160510.33 |
| PH5 | 1906803.50 | 1562479.71 | 1345483.90 | 1562479.71 |
| IA7 | 1572772.58 | 1291833.04 | 1122409.64 | 1291833.04 |
| ME Eastbound | 2391252.27 | 2049662.93 | 1826641.44 | 2049662.93 |
| ME Westbound | 1947836.00 | 1617796.27 | 1417306.20 | 1617796.27 |
| IA1 | 4143431.08 | 3271964.30 | 2750118.93 | 3271964.30 |
| IA8 | 5988903.86 | 4727507.91 | 4014116.78 | 4727507.91 |
| TP17 Westbound | 10042892.94 | 8190327.66 | 7102760.45 | 8190327.66 |
| FEW 6 | 8399212.34 | 6931557.06 | 6071018.25 | 6931557.06 |
| TP17 Eastbound | 6531635.37 | 5583102.93 | 5026455.99 | 5583102.93 |
| FEW 3 | 14032362.30 | 11495454.62 | 10008250.05 | 11495454.62 |
| TP2 Westbound | 7405099.90 | 6023080.26 | 5157853.68 | 6023080.26 |
| TP2 Eastbound | 4147563.21 | 3372745.10 | 2867080.22 | 3372745.10 |
| AE7 Westbound | 7706228.82 | 6169580.91 | 5241711.70 | 6169580.91 |
| AE7 Eastbound | 8873752.23 | 7173479.88 | 6185650.59 | 7173479.88 |
| AE11 Westbound | 10647960.56 | 8280502.13 | 6986171.46 | 8280502.13 |

Supplementary Table 60. Total cost ($) for onboard regeneration scheme at 20% load limit under 2050 carbon tax

| Routes | MEA | PZ | NE-2 | DES |
| --- | --- | --- | --- | --- |
| IA88 | 1436818.58 | 1213919.27 | 1077227.07 | 1213919.27 |
| PH5 | 1992532.06 | 1622271.77 | 1395826.62 | 1622271.77 |
| IA7 | 1636651.95 | 1340414.08 | 1162444.93 | 1340414.08 |
| ME Eastbound | 2607879.51 | 2237463.16 | 1997192.17 | 2237463.16 |
| ME Westbound | 2075874.43 | 1726819.20 | 1516257.40 | 1726819.20 |
| IA1 | 4254336.24 | 3358057.15 | 2826703.63 | 3358057.15 |
| IA8 | 6209631.82 | 4909939.52 | 4172420.01 | 4909939.52 |
| TP17 Westbound | 10363142.72 | 8428734.68 | 7291334.13 | 8428734.68 |
| FEW 6 | 8991044.38 | 7458038.88 | 6563943.18 | 7458038.88 |
| TP17 Eastbound | 6988366.17 | 5997591.85 | 5412757.26 | 5997591.85 |
| FEW 3 | 14955664.43 | 12310966.79 | 10752451.06 | 12310966.79 |
| TP2 Westbound | 7808325.06 | 6329485.27 | 5415748.06 | 6329485.27 |
| TP2 Eastbound | 4320217.61 | 3483824.04 | 2946346.22 | 3483824.04 |
| AE7 Westbound | 7896828.77 | 6312046.33 | 5370545.88 | 6312046.33 |
| AE7 Eastbound | 9153316.41 | 7383267.81 | 6349433.89 | 7383267.81 |
| AE11 Westbound | 10888070.42 | 8484727.82 | 7170856.62 | 8484727.82 |

Supplementary Table 61. Total cost ($) for onboard regeneration scheme at 30% load limit under 2030 carbon tax

| Routes | MEA | PZ | NE-2 | DES |
| --- | --- | --- | --- | --- |
| IA88 | 1531367.42 | 1234010.29 | 1060743.33 | 1234010.29 |
| PH5 | 2013254.64 | 1568285.10 | 1323158.02 | 1568285.10 |
| IA7 | 1671975.15 | 1317679.63 | 1119395.33 | 1317679.63 |
| ME Eastbound | 2363304.51 | 1961410.05 | 1700838.79 | 1961410.05 |
| ME Westbound | 1940355.96 | 1584404.99 | 1371418.63 | 1584404.99 |
| IA1 | 4053197.19 | 3121794.27 | 2612633.29 | 3121794.27 |
| IA8 | 6061951.89 | 4668303.20 | 3890021.35 | 4668303.20 |
| TP17 Westbound | 10305983.47 | 8073670.05 | 6852206.82 | 8073670.05 |
| FEW 6 | 7917151.93 | 6396315.49 | 5514114.47 | 6396315.49 |
| TP17 Eastbound | 6446719.45 | 5481922.73 | 4909798.56 | 5481922.73 |
| FEW 3 | 13539059.36 | 10919066.74 | 9362823.56 | 10919066.74 |
| TP2 Westbound | 7649767.54 | 5946946.43 | 4942918.68 | 5946946.43 |
| TP2 Eastbound | 4233373.91 | 3257824.01 | 2724781.08 | 3257824.01 |
| AE7 Westbound | 7564669.00 | 5913825.50 | 5010427.24 | 5913825.50 |
| AE7 Eastbound | 9003043.26 | 7014355.35 | 5926531.46 | 7014355.35 |
| AE11 Westbound | 10216912.83 | 7913874.02 | 6654622.72 | 7913874.02 |

Supplementary Table 62. Total cost ($) for onboard regeneration scheme at 30% load limit under 2040 carbon tax

| Routes | MEA | PZ | NE-2 | DES |
| --- | --- | --- | --- | --- |
| IA88 | 1590968.755 | 1280792.642 | 1103049.499 | 1280792.642 |
| PH5 | 2097439.539 | 1639055.665 | 1387157.181 | 1639055.665 |
| IA7 | 1739745.163 | 1373402.611 | 1169786.676 | 1373402.611 |
| ME Eastbound | 2619218.471 | 2145794.06 | 1836898.912 | 2145794.06 |
| ME Westbound | 2100231.797 | 1703745.612 | 1463205.1 | 1703745.612 |
| IA1 | 4231942.777 | 3273826.52 | 2750118.932 | 3273826.52 |
| IA8 | 6352324.227 | 4905749.631 | 4104748.66 | 4905749.631 |
| TP17 Westbound | 10705493 | 8413473.307 | 7159497.34 | 8413473.307 |
| FEW 6 | 8792376.81 | 7143528.845 | 6176536.371 | 7143528.845 |
| TP17 Eastbound | 7105174.385 | 6030246.747 | 5383238.172 | 6030246.747 |
| FEW 3 | 14809983.36 | 11914369.39 | 10171972.67 | 11914369.39 |
| TP2 Westbound | 8052487.644 | 6247351.514 | 5214580.686 | 6247351.514 |
| TP2 Eastbound | 4418377.557 | 3415179.054 | 2867080.223 | 3415179.054 |
| AE7 Westbound | 7865362.782 | 6169580.91 | 5241711.703 | 6169580.91 |
| AE7 Eastbound | 9367714.441 | 7324526.809 | 6207025.386 | 7324526.809 |
| AE11 Westbound | 10647960.56 | 8280502.127 | 6986171.46 | 8280502.127 |

Supplementary Table 63. Total cost ($) for onboard regeneration scheme at 30% load limit under 2050 carbon tax

| Routes | MEA | PZ | NE-2 | DES |
| --- | --- | --- | --- | --- |
| IA88 | 1624168.946 | 1306852.178 | 1126615.632 | 1306852.178 |
| PH5 | 2144333.707 | 1678477.539 | 1422807.128 | 1678477.539 |
| IA7 | 1777495.617 | 1404442.414 | 1197856.558 | 1404442.414 |
| ME Eastbound | 2761772.205 | 2248502.914 | 1912689.535 | 2248502.914 |
| ME Westbound | 2189288.671 | 1770222.843 | 1514333.627 | 1770222.843 |
| IA1 | 4331510.817 | 3358514.222 | 2826703.625 | 3358514.222 |
| IA8 | 6514072.579 | 5038016.255 | 4224359.873 | 5038016.255 |
| TP17 Westbound | 10928034.88 | 8602756.543 | 7330669.755 | 8602756.543 |
| FEW 6 | 9279910.095 | 7559754.882 | 6545530.37 | 7559754.882 |
| TP17 Eastbound | 7471958.632 | 6335683.919 | 5646961.899 | 6335683.919 |
| FEW 3 | 15517935.99 | 12468790.53 | 10622699.27 | 12468790.53 |
| TP2 Westbound | 8276817.937 | 6414688.484 | 5365906.676 | 6414688.484 |
| TP2 Eastbound | 4521431.567 | 3502831.753 | 2946346.218 | 3502831.753 |
| AE7 Westbound | 8032860.565 | 6312046.327 | 5370545.878 | 6312046.327 |
| AE7 Eastbound | 9570850.05 | 7497304.017 | 6363271.087 | 7497304.017 |
| AE11 Westbound | 10888070.42 | 8484727.819 | 7170856.62 | 8484727.819 |

Supplementary Note 16. Total Cost with Carbon Tax (TCT) for onshore regeneration

The total cost with carbon tax for the onshore regeneration scheme is calculated using the following expression:

where is the carbon tax ($/tonne CO2). is the onshore-regeneration emission factor (Supplementary Table 54).

The values of , , and across 2030, 2040, and 2050 are summarized in Supplementary Table 64.

Supplementary Table 64. Global carbon tax and emission factors

|  | 2030 | 2040 | 2050 |
| --- | --- | --- | --- |
| Carbon tax ($/tonne CO2) | 102.2 | 168.8 | 205.9 |
| (g CO2/kwh) | 261.2 | 137.7 | 14.1 |
| (g CO2/kwh) | 270 | 149.5 | 29 |

The resulting total cost for onshore regeneration under various scenarios is summarized in Supplementary Tables 65-73.

Supplementary Table 65. Total cost ($) for onshore regeneration scheme at 10% load limit under 2030 carbon tax

| Routes | MEA | PZ | NE-2 | DES |
| --- | --- | --- | --- | --- |
| IA88 | 706247.49 | 668475.57 | 694935.73 | 585521.95 |
| PH5 | 967167.49 | 927412.13 | 955374.62 | 856311.33 |
| IA7 | 800651.45 | 757096.82 | 789307.04 | 689885.40 |
| ME Eastbound | 1335733.26 | 1298793.27 | 1324920.26 | 1216157.88 |
| ME Westbound | 1071113.14 | 1034173.16 | 1060300.14 | 951537.77 |
| IA1 | 2210387.95 | 2099284.58 | 2178374.50 | 1921519.21 |
| IA8 | 3399893.69 | 3237394.98 | 3352812.42 | 2923280.47 |
| TP17 Westbound | 6569592.31 | 6187055.94 | 6649578.27 | 5506006.47 |
| FEW 6 | 4933018.55 | 4730340.03 | 4888412.11 | 4444116.13 |
| TP17 Eastbound | 4431476.30 | 4224754.38 | 4392170.92 | 3793104.95 |
| FEW 3 | 8359641.76 | 8041605.10 | 8279339.16 | 7521030.74 |
| TP2 Westbound | 4444565.17 | 4305736.46 | 4404376.64 | 3988345.18 |
| TP2 Eastbound | 2624494.83 | 2467364.46 | 2657029.67 | 2224395.02 |
| AE7 Westbound | 5299292.63 | 4925177.15 | 5220628.73 | 4128564.15 |
| AE7 Eastbound | 5767082.30 | 5388103.52 | 5742303.96 | 4646715.87 |
| AE11 Westbound | 7822790.36 | 7296543.10 | 7843570.74 | 6164428.11 |

Supplementary Table 66. Total cost ($) for onshore regeneration scheme at 10% load limit under 2040 carbon tax

| Routes | MEA | PZ | NE-2 | DES |
| --- | --- | --- | --- | --- |
| IA88 | 938660.00 | 866196.47 | 951211.90 | 731296.23 |
| PH5 | 1358595.95 | 1282443.98 | 1371839.59 | 1127994.94 |
| IA7 | 1093455.35 | 1018745.39 | 1106099.44 | 876509.91 |
| ME Eastbound | 1966827.25 | 1896336.33 | 1979132.93 | 1757604.72 |
| ME Westbound | 1529777.22 | 1459286.30 | 1542082.90 | 1320554.69 |
| IA1 | 2998468.68 | 2789232.02 | 3034901.42 | 2354436.67 |
| IA8 | 4650999.92 | 4341706.43 | 4705190.87 | 3735054.52 |
| TP17 Westbound | 8318740.51 | 7746595.56 | 8534072.44 | 6649948.41 |
| FEW 6 | 7040694.55 | 6721685.00 | 7092230.70 | 6133055.07 |
| TP17 Eastbound | 5782460.19 | 5453470.16 | 5837394.63 | 4772900.30 |
| FEW 3 | 11802199.91 | 11249855.69 | 11895951.08 | 10151819.03 |
| TP2 Westbound | 6176500.90 | 5911598.91 | 6223035.64 | 5328499.82 |
| TP2 Eastbound | 3460892.47 | 3229001.79 | 3547352.66 | 2814483.41 |
| AE7 Westbound | 6430651.79 | 5848342.32 | 6521106.79 | 4713291.10 |
| AE7 Eastbound | 7292029.68 | 6719766.07 | 7421125.31 | 5641491.54 |
| AE11 Westbound | 9391717.02 | 8533235.89 | 9645475.43 | 6804224.44 |

Supplementary Table 67. Total cost ($) for onshore regeneration scheme at 10% load limit under 2050 carbon tax

| Routes | MEA | PZ | NE-2 | DES |
| --- | --- | --- | --- | --- |
| IA88 | 1035600.28 | 942140.51 | 1080722.45 | 763579.53 |
| PH5 | 1542515.73 | 1444335.61 | 1589930.38 | 1219833.03 |
| IA7 | 1223865.78 | 1131174.49 | 1269250.52 | 925881.88 |
| ME Eastbound | 2286863.43 | 2196080.21 | 2330722.61 | 2010200.16 |
| ME Westbound | 1753763.43 | 1662980.21 | 1797622.61 | 1477100.17 |
| IA1 | 3344178.43 | 3075871.29 | 3474029.83 | 2425044.25 |
| IA8 | 5209895.87 | 4811859.37 | 5402308.00 | 3959332.06 |
| TP17 Westbound | 9079948.97 | 8401927.38 | 9492516.81 | 6955973.63 |
| FEW 6 | 8083723.02 | 7699820.60 | 8266479.18 | 6857020.76 |
| TP17 Eastbound | 6405670.41 | 6006373.84 | 6589622.78 | 5116588.31 |
| FEW 3 | 13482488.37 | 12792774.90 | 13813857.36 | 11209385.70 |
| TP2 Westbound | 7023064.85 | 6681860.12 | 7187963.66 | 5875435.68 |
| TP2 Eastbound | 3838093.72 | 3565628.68 | 4004789.23 | 3006924.75 |
| AE7 Westbound | 6830380.19 | 6130926.89 | 7151656.77 | 4711420.98 |
| AE7 Eastbound | 7919813.94 | 7240725.98 | 8264142.65 | 5879300.66 |
| AE11 Westbound | 9915256.56 | 8865474.81 | 10501345.47 | 6634776.55 |

Supplementary Table 68. Total cost ($) for onshore regeneration scheme at 20% load limit under 2030 carbon tax

| Routes | MEA | PZ | NE-2 | DES |
| --- | --- | --- | --- | --- |
| IA88 | 879309.94 | 761691.41 | 901308.61 | 627047.43 |
| PH5 | 1175334.15 | 1081573.40 | 1171669.98 | 943550.57 |
| IA7 | 984867.93 | 890580.04 | 981039.50 | 747443.99 |
| ME Eastbound | 1520472.72 | 1420359.24 | 1545719.62 | 1303663.09 |
| ME Westbound | 1255852.60 | 1155739.13 | 1281099.50 | 1039042.97 |
| IA1 | 2804201.90 | 2555862.72 | 2761030.51 | 2083048.04 |
| IA8 | 4169247.08 | 3778086.56 | 4203707.17 | 3152356.64 |
| TP17 Westbound | 8955076.15 | 7876702.05 | 9136711.58 | 6166800.25 |
| FEW 6 | 5871924.33 | 5518451.46 | 5886378.76 | 4942645.49 |
| TP17 Eastbound | 6026314.82 | 5247370.83 | 6048454.83 | 4081769.90 |
| FEW 3 | 10320198.24 | 9507657.56 | 10216497.64 | 8297942.18 |
| TP2 Westbound | 5622534.09 | 5154184.99 | 5671528.36 | 4402155.67 |
| TP2 Eastbound | 3408898.98 | 2971357.62 | 3419435.76 | 2415170.53 |
| AE7 Westbound | 7066845.56 | 6031522.13 | 7458461.32 | 4440213.26 |
| AE7 Eastbound | 7464885.42 | 6491595.76 | 7807634.02 | 5268165.25 |
| AE11 Westbound | 11078683.16 | 9061993.39 | 11306883.91 | 6479427.85 |

Supplementary Table 69. Total cost ($) for onshore regeneration scheme at 20% load limit under 2040 carbon tax

| Routes | MEA | PZ | NE-2 | DES |
| --- | --- | --- | --- | --- |
| IA88 | 1043397.78 | 896910.30 | 1095507.03 | 698909.60 |
| PH5 | 1484472.56 | 1333007.12 | 1523006.23 | 1059027.81 |
| IA7 | 1204908.81 | 1062652.87 | 1240136.34 | 831393.22 |
| ME Eastbound | 2087331.43 | 1947782.03 | 2141854.04 | 1718893.43 |
| ME Westbound | 1650281.40 | 1510732.00 | 1704804.01 | 1281843.40 |
| IA1 | 3357206.19 | 2938221.09 | 3441915.81 | 2224814.51 |
| IA8 | 5115412.54 | 4517369.65 | 5299336.63 | 3548873.37 |
| TP17 Westbound | 10259480.56 | 8954127.55 | 10678027.91 | 6916285.19 |
| FEW 6 | 7701056.36 | 7131788.89 | 7867843.10 | 6069265.99 |
| TP17 Eastbound | 7080031.52 | 6184407.05 | 7265183.87 | 4889381.85 |
| FEW 3 | 13181077.75 | 12012649.47 | 13401471.85 | 10052159.35 |
| TP2 Westbound | 7073055.47 | 6441732.33 | 7264589.73 | 5399979.38 |
| TP2 Eastbound | 4057904.09 | 3543910.24 | 4174023.62 | 2847437.02 |
| AE7 Westbound | 7788618.45 | 6553594.35 | 8372812.10 | 4777847.74 |
| AE7 Eastbound | 8596409.30 | 7423199.59 | 9130092.58 | 5770221.86 |
| AE11 Westbound | 11892752.35 | 9658120.28 | 12510975.57 | 6869029.51 |

Supplementary Table 70. Total cost ($) for onshore regeneration scheme at 20% load limit under 2050 carbon tax

| Routes | MEA | PZ | NE-2 | DES |
| --- | --- | --- | --- | --- |
| IA88 | 1076422.97 | 920321.88 | 1177192.98 | 669070.36 |
| PH5 | 1591413.18 | 1407825.33 | 1690921.97 | 1019575.65 |
| IA7 | 1267252.23 | 1099794.26 | 1358838.85 | 794467.41 |
| ME Eastbound | 2347277.98 | 2188590.36 | 2448700.31 | 1865404.89 |
| ME Westbound | 1814177.99 | 1655490.36 | 1915600.32 | 1332304.89 |
| IA1 | 3483011.01 | 2966334.15 | 3745730.18 | 2050711.97 |
| IA8 | 5389048.16 | 4680719.10 | 5798654.73 | 3424130.37 |
| TP17 Westbound | 10604648.38 | 9204246.22 | 11372088.61 | 6890772.37 |
| FEW 6 | 8483517.71 | 7792212.10 | 8870790.24 | 6320607.42 |
| TP17 Eastbound | 7425159.76 | 6492156.36 | 7841380.08 | 5088351.07 |
| FEW 3 | 14317228.31 | 12964485.26 | 14986845.12 | 10372974.84 |
| TP2 Westbound | 7656367.18 | 6944452.17 | 8055717.71 | 5659188.78 |
| TP2 Eastbound | 4259806.86 | 3721612.92 | 4526890.06 | 2907230.29 |
| AE7 Westbound | 7805194.71 | 6499063.42 | 8705890.23 | 4568298.35 |
| AE7 Eastbound | 8856161.07 | 7607913.26 | 9698568.58 | 5593904.46 |
| AE11 Westbound | 11710151.88 | 9451968.55 | 12906291.40 | 6489294.95 |

Supplementary Table 71. Total cost ($) for onshore regeneration scheme at 30% load limit under 2030 carbon tax

| Routes | MEA | PZ | NE-2 | DES |
| --- | --- | --- | --- | --- |
| IA88 | 974546.97 | 824360.37 | 1013810.90 | 654043.96 |
| PH5 | 1357804.72 | 1216901.38 | 1348794.63 | 985348.67 |
| IA7 | 1134582.11 | 982382.32 | 1146939.02 | 774049.65 |
| ME Eastbound | 1664142.67 | 1541925.22 | 1682901.77 | 1384586.44 |
| ME Westbound | 1399522.55 | 1277305.10 | 1418281.65 | 1097199.79 |
| IA1 | 3316240.98 | 2824946.55 | 3309494.76 | 2128013.97 |
| IA8 | 4797468.14 | 4155808.26 | 4827338.98 | 3252389.67 |
| TP17 Westbound | 10475930.50 | 8676345.99 | 11313754.32 | 6668227.33 |
| FEW 6 | 6779671.67 | 6233271.49 | 6759432.20 | 5145161.91 |
| TP17 Eastbound | 6813865.88 | 5588693.18 | 7336321.12 | 4243062.37 |
| FEW 3 | 11827656.95 | 10552453.31 | 11961594.88 | 8634628.72 |
| TP2 Westbound | 6477074.69 | 5645981.97 | 6689479.85 | 4783706.70 |
| TP2 Eastbound | 3805189.14 | 3205059.93 | 4179726.79 | 2605946.04 |
| AE7 Westbound | 8162111.84 | 6411636.45 | 8755645.18 | 4616657.50 |
| AE7 Eastbound | 8556972.03 | 7343390.24 | 9100191.13 | 5491254.82 |
| AE11 Westbound | 12230704.77 | 9417743.29 | 13909463.46 | 6771949.32 |

Supplementary Table 72. Total cost ($) for onshore regeneration scheme at 30% load limit under 2040 carbon tax

| Routes | MEA | PZ | NE-2 | DES |
| --- | --- | --- | --- | --- |
| IA88 | 1101035.44 | 917559.18 | 1174168.21 | 677854.41 |
| PH5 | 1594810.97 | 1377393.16 | 1646796.86 | 1025984.25 |
| IA7 | 1295487.90 | 1092849.97 | 1356113.87 | 810538.66 |
| ME Eastbound | 2181046.27 | 1999227.72 | 2242952.29 | 1683093.87 |
| ME Westbound | 1743996.24 | 1562177.69 | 1805902.26 | 1256115.49 |
| IA1 | 3666541.50 | 3026027.63 | 3825045.54 | 2188730.68 |
| IA8 | 5494632.00 | 4640086.20 | 5734793.77 | 3467571.75 |
| TP17 Westbound | 11496790.53 | 9525605.59 | 12554679.49 | 7118388.29 |
| FEW 6 | 8339503.46 | 7503754.66 | 8546373.88 | 6043353.10 |
| TP17 Eastbound | 7720788.35 | 6428374.47 | 8375380.99 | 4954466.30 |
| FEW 3 | 14241287.67 | 12556261.47 | 14757726.48 | 10008970.29 |
| TP2 Westbound | 7723448.09 | 6749020.28 | 8101310.02 | 5465886.61 |
| TP2 Eastbound | 4359521.35 | 3689933.72 | 4798956.08 | 2880390.63 |
| AE7 Westbound | 8630084.11 | 6795902.49 | 9446173.11 | 4814397.34 |
| AE7 Eastbound | 9435432.11 | 7966185.54 | 10199625.16 | 5816433.82 |
| AE11 Westbound | 12777685.27 | 9884791.91 | 14664315.95 | 6929210.11 |

Supplementary Table 73. Total cost ($) for onshore regeneration scheme at 30% load limit under 2050 carbon tax

| Routes | MEA | PZ | NE-2 | DES |
| --- | --- | --- | --- | --- |
| IA88 | 1098887.88 | 905653.22 | 1229783.02 | 607628.07 |
| PH5 | 1634274.72 | 1375775.37 | 1773624.16 | 923628.26 |
| IA7 | 1302512.74 | 1078212.69 | 1436356.56 | 733722.91 |
| ME Eastbound | 2394261.76 | 2181100.51 | 2521999.60 | 1731500.64 |
| ME Westbound | 1861161.76 | 1648000.51 | 1988899.60 | 1236072.53 |
| IA1 | 3602724.78 | 2901778.56 | 4001486.46 | 1946506.44 |
| IA8 | 5535336.26 | 4589105.82 | 6089142.40 | 3190418.40 |
| TP17 Westbound | 11576713.54 | 9583952.59 | 13017319.32 | 6841296.00 |
| FEW 6 | 8870044.85 | 7876011.54 | 9399461.05 | 6102701.48 |
| TP17 Eastbound | 7928596.27 | 6654297.72 | 8814701.16 | 5072573.42 |
| FEW 3 | 14959054.25 | 13086856.23 | 16043536.00 | 10010503.31 |
| TP2 Westbound | 8115787.23 | 7096661.73 | 8752817.76 | 5459799.86 |
| TP2 Eastbound | 4472861.28 | 3793943.02 | 5047542.49 | 2807535.83 |
| AE7 Westbound | 8409239.69 | 6625546.55 | 9606818.47 | 4487267.59 |
| AE7 Eastbound | 9458452.45 | 7891348.06 | 10596283.42 | 5491452.16 |
| AE11 Westbound | 12345233.66 | 9570150.92 | 14713538.62 | 6354194.86 |

Supplementary Note 17. Scheme comparison and selection

For each route, the scheme with the lowest total cost (TCT) under specific carbon taxes and SBCC load limits is selected as the optimal option, as presented in Supplementary Tables 74-82.

Supplementary Table 74. Lowest total cost and regeneration scheme selection at 10% load limit under 2030 carbon tax

| Routes | Lowest total cost ($) | Scheme |
| --- | --- | --- |
| IA88 | 585522.0 | DES Onshore |
| PH5 | 856311.3 | DES Onshore |
| IA7 | 689885.4 | DES Onshore |
| ME Eastbound | 1216157.9 | DES Onshore |
| ME Westbound | 951537.8 | DES Onshore |
| IA1 | 1921519.2 | DES Onshore |
| IA8 | 2923280.5 | DES Onshore |
| TP17 Westbound | 5506006.5 | DES Onshore |
| FEW 6 | 4444116.1 | DES Onshore |
| TP17 Eastbound | 3793105.0 | DES Onshore |
| FEW 3 | 7521030.7 | DES Onshore |
| TP2 Westbound | 3988345.2 | DES Onshore |
| TP2 Eastbound | 2224395.0 | DES Onshore |
| AE7 Westbound | 4128564.1 | DES Onshore |
| AE7 Eastbound | 4646715.9 | DES Onshore |
| AE11 Westbound | 6164428.1 | DES Onshore |

Supplementary Table 75. Lowest total cost and regeneration scheme selection at 20% load limit under 2030 carbon tax

| Routes | Lowest total cost ($) | Scheme |
| --- | --- | --- |
| IA88 | 627047.4 | DES Onshore |
| PH5 | 943550.6 | DES Onshore |
| IA7 | 747444.0 | DES Onshore |
| ME Eastbound | 1303663.1 | DES Onshore |
| ME Westbound | 1039043.0 | DES Onshore |
| IA1 | 2083048.0 | DES Onshore |
| IA8 | 3152356.6 | DES Onshore |
| TP17 Westbound | 6166800.2 | DES Onshore |
| FEW 6 | 4942645.5 | DES Onshore |
| TP17 Eastbound | 4081769.9 | DES Onshore |
| FEW 3 | 8297942.2 | DES Onshore |
| TP2 Westbound | 4402155.7 | DES Onshore |
| TP2 Eastbound | 2415170.5 | DES Onshore |
| AE7 Westbound | 4440213.3 | DES Onshore |
| AE7 Eastbound | 5268165.3 | DES Onshore |
| AE11 Westbound | 6479427.8 | DES Onshore |

Supplementary Table 76. Lowest total cost and regeneration scheme selection at 30% load limit under 2030 carbon tax

| Routes | Lowest total cost ($) | Scheme |
| --- | --- | --- |
| IA88 | 654044.0 | DES Onshore |
| PH5 | 985348.7 | DES Onshore |
| IA7 | 774049.7 | DES Onshore |
| ME Eastbound | 1384586.4 | DES Onshore |
| ME Westbound | 1097199.8 | DES Onshore |
| IA1 | 2128014.0 | DES Onshore |
| IA8 | 3252389.7 | DES Onshore |
| TP17 Westbound | 6668227.3 | DES Onshore |
| FEW 6 | 5145161.9 | DES Onshore |
| TP17 Eastbound | 4243062.4 | DES Onshore |
| FEW 3 | 8634628.7 | DES Onshore |
| TP2 Westbound | 4783706.7 | DES Onshore |
| TP2 Eastbound | 2605946.0 | DES Onshore |
| AE7 Westbound | 4616657.5 | DES Onshore |
| AE7 Eastbound | 5491254.8 | DES Onshore |
| AE11 Westbound | 6654622.7 | NE-2 Onboard |

Supplementary Table 77. Lowest total cost and regeneration scheme selection at 10% load limit under 2040 carbon tax

| Routes | Lowest total cost ($) | Scheme |
| --- | --- | --- |
| IA88 | 731296.2 | DES Onshore |
| PH5 | 1127994.9 | DES Onshore |
| IA7 | 876509.9 | DES Onshore |
| ME Eastbound | 1757604.7 | DES Onshore |
| ME Westbound | 1320554.7 | DES Onshore |
| IA1 | 2354436.7 | DES Onshore |
| IA8 | 3735054.5 | DES Onshore |
| TP17 Westbound | 6499960.5 | NE-2 Onboard |
| FEW 6 | 6081896.7 | NE-2 Onboard |
| TP17 Eastbound | 4754182.1 | NE-2 Onboard |
| FEW 3 | 9995721.6 | NE-2 Onboard |
| TP2 Westbound | 5155540.8 | NE-2 Onboard |
| TP2 Eastbound | 2764019.3 | NE-2 Onboard |
| AE7 Westbound | 4713291.1 | DES Onshore |
| AE7 Eastbound | 5641491.5 | DES Onshore |
| AE11 Westbound | 6726564.5 | NE-2 Onboard |

Supplementary Table 78. Lowest total cost and regeneration scheme selection at 20% load limit under 2040 carbon tax

| Routes | Lowest total cost ($) | Scheme |
| --- | --- | --- |
| IA88 | 698909.6 | DES Onshore |
| PH5 | 1059027.8 | DES Onshore |
| IA7 | 831393.2 | DES Onshore |
| ME Eastbound | 1718893.4 | DES Onshore |
| ME Westbound | 1281843.4 | DES Onshore |
| IA1 | 2224814.5 | DES Onshore |
| IA8 | 3548873.4 | DES Onshore |
| TP17 Westbound | 6916285.2 | DES Onshore |
| FEW 6 | 6069266.0 | DES Onshore |
| TP17 Eastbound | 4889381.9 | DES Onshore |
| FEW 3 | 10008250.1 | NE-2 Onboard |
| TP2 Westbound | 5157853.7 | NE-2 Onboard |
| TP2 Eastbound | 2847437.0 | DES Onshore |
| AE7 Westbound | 4777847.7 | DES Onshore |
| AE7 Eastbound | 5770221.9 | DES Onshore |
| AE11 Westbound | 6869029.5 | DES Onshore |

Supplementary Table 79. Lowest total cost and regeneration scheme selection at 30% load limit under 2040 carbon tax

| Routes | Lowest total cost ($) | Scheme |
| --- | --- | --- |
| IA88 | 677854.4 | DES Onshore |
| PH5 | 1025984.2 | DES Onshore |
| IA7 | 810538.7 | DES Onshore |
| ME Eastbound | 1683093.9 | DES Onshore |
| ME Westbound | 1256115.5 | DES Onshore |
| IA1 | 2188730.7 | DES Onshore |
| IA8 | 3467571.8 | DES Onshore |
| TP17 Westbound | 7118388.3 | DES Onshore |
| FEW 6 | 6043353.1 | DES Onshore |
| TP17 Eastbound | 4954466.3 | DES Onshore |
| FEW 3 | 10008970.3 | DES Onshore |
| TP2 Westbound | 5214580.7 | NE-2 Onboard |
| TP2 Eastbound | 2867080.2 | NE-2 Onboard |
| AE7 Westbound | 4814397.3 | DES Onshore |
| AE7 Eastbound | 5816433.8 | DES Onshore |
| AE11 Westbound | 6929210.1 | DES Onshore |

Supplementary Table 80. Lowest total cost and regeneration scheme selection at 10% load limit under 2050 carbon tax

| Routes | Lowest total cost ($) | Scheme |
| --- | --- | --- |
| IA88 | 763579.5 | DES Onshore |
| PH5 | 1219833.0 | DES Onshore |
| IA7 | 925881.9 | DES Onshore |
| ME Eastbound | 2010200.2 | DES Onshore |
| ME Westbound | 1477100.2 | DES Onshore |
| IA1 | 2425044.3 | DES Onshore |
| IA8 | 3959332.1 | DES Onshore |
| TP17 Westbound | 6955973.6 | DES Onshore |
| FEW 6 | 6812960.8 | NE-2 Onboard |
| TP17 Eastbound | 5116588.3 | DES Onshore |
| FEW 3 | 11124911.4 | NE-2 Onboard |
| TP2 Westbound | 5757983.0 | NE-2 Onboard |
| TP2 Eastbound | 3006924.8 | DES Onshore |
| AE7 Westbound | 4711421.0 | DES Onshore |
| AE7 Eastbound | 5879300.7 | DES Onshore |
| AE11 Westbound | 6634776.6 | DES Onshore |

Supplementary Table 81. Lowest total cost and regeneration scheme selection at 20% load limit under 2050 carbon tax

| Routes | Lowest total cost ($) | Scheme |
| --- | --- | --- |
| IA88 | 669070.4 | DES Onshore |
| PH5 | 1019575.7 | DES Onshore |
| IA7 | 794467.4 | DES Onshore |
| ME Eastbound | 1865404.9 | DES Onshore |
| ME Westbound | 1332304.9 | DES Onshore |
| IA1 | 2050712.0 | DES Onshore |
| IA8 | 3424130.4 | DES Onshore |
| TP17 Westbound | 6890772.4 | DES Onshore |
| FEW 6 | 6320607.4 | DES Onshore |
| TP17 Eastbound | 5088351.1 | DES Onshore |
| FEW 3 | 10372974.8 | DES Onshore |
| TP2 Westbound | 5415748.1 | NE-2 Onboard |
| TP2 Eastbound | 2907230.3 | DES Onshore |
| AE7 Westbound | 4568298.4 | DES Onshore |
| AE7 Eastbound | 5593904.5 | DES Onshore |
| AE11 Westbound | 6489295.0 | DES Onshore |

Supplementary Table 82. Lowest total cost and regeneration scheme selection at 30% load limit under 2050 carbon tax

| Routes | Lowest total cost ($) | Scheme |
| --- | --- | --- |
| IA88 | 607628.1 | DES Onshore |
| PH5 | 923628.3 | DES Onshore |
| IA7 | 733722.9 | DES Onshore |
| ME Eastbound | 1731500.6 | DES Onshore |
| ME Westbound | 1236072.5 | DES Onshore |
| IA1 | 1946506.4 | DES Onshore |
| IA8 | 3190418.4 | DES Onshore |
| TP17 Westbound | 6841296.0 | DES Onshore |
| FEW 6 | 6102701.5 | DES Onshore |
| TP17 Eastbound | 5072573.4 | DES Onshore |
| FEW 3 | 10010503.3 | DES Onshore |
| TP2 Westbound | 5365906.7 | NE-2 Onboard |
| TP2 Eastbound | 2807535.8 | DES Onshore |
| AE7 Westbound | 4487267.6 | DES Onshore |
| AE7 Eastbound | 5491452.2 | DES Onshore |
| AE11 Westbound | 6354194.9 | DES Onshore |

Supplementary Note 18. Unit penalty

Unit penalty is calculated by dividing the total cost with the amount of CO2 emitted.

The unit penalties for the regeneration scheme possessing the lower *TCT* under various carbon tax levels and load limits are summarized in Supplementary Tables 83-85.

Supplementary Table 83. Unit penalty under 2030 carbon tax ($/tonne CO2)

| Routes |  |  |  |
| --- | --- | --- | --- |
| IA88 | 122.5 | 131.2 | 136.8 |
| PH5 | 118.4 | 130.5 | 136.2 |
| IA7 | 121.1 | 131.3 | 135.9 |
| ME Eastbound | 113.4 | 121.5 | 129.1 |
| ME Westbound | 116.9 | 127.7 | 134.8 |
| IA1 | 123.7 | 134.1 | 137.0 |
| IA8 | 120.5 | 129.9 | 134.0 |
| TP17 Westbound | 158.6 | 177.6 | 192.0 |
| FEW 6 | 120.6 | 134.1 | 139.6 |
| TP17 Eastbound | 149.2 | 160.6 | 166.9 |
| FEW 3 | 123.1 | 135.8 | 141.3 |
| TP2 Westbound | 129.9 | 143.4 | 155.8 |
| TP2 Eastbound | 138.3 | 150.2 | 162.1 |
| AE7 Westbound | 158.0 | 169.9 | 176.6 |
| AE7 Eastbound | 146.6 | 166.2 | 173.2 |
| AE11 Westbound | 164.5 | 172.9 | 136.8 |

Supplementary Table 84. Unit penalty under 2040 carbon tax ($/tonne CO2)

| Routes |  |  |  |
| --- | --- | --- | --- |
| IA88 | 153.0 | 146.2 | 141.8 |
| PH5 | 156.0 | 146.4 | 141.9 |
| IA7 | 153.9 | 146.0 | 142.3 |
| ME Eastbound | 163.8 | 160.2 | 156.9 |
| ME Westbound | 162.3 | 157.5 | 154.3 |
| IA1 | 151.5 | 143.2 | 140.9 |
| IA8 | 153.9 | 146.2 | 142.9 |
| TP17 Westbound | 141.4 | 199.2 | 205.0 |
| FEW 6 | 132.8 | 164.7 | 164.0 |
| TP17 Eastbound | 152.8 | 192.3 | 194.9 |
| FEW 3 | 130.3 | 130.5 | 163.8 |
| TP2 Westbound | 129.8 | 129.9 | 131.3 |
| TP2 Eastbound | 129.3 | 177.1 | 134.2 |
| AE7 Westbound | 180.3 | 182.8 | 184.2 |
| AE7 Eastbound | 178.0 | 182.0 | 183.5 |
| AE11 Westbound | 135.1 | 183.3 | 184.9 |

Supplementary Table 85. Unit penalty under 2050 carbon tax ($/tonne CO2)

| Routes |  |  |  |
| --- | --- | --- | --- |
| IA88 | 159.7 | 139.9 | 127.1 |
| PH5 | 168.7 | 141.0 | 127.7 |
| IA7 | 162.6 | 139.5 | 128.8 |
| ME Eastbound | 187.4 | 173.9 | 161.4 |
| ME Westbound | 181.5 | 163.7 | 151.9 |
| IA1 | 156.1 | 132.0 | 125.3 |
| IA8 | 163.2 | 141.1 | 131.5 |
| TP17 Westbound | 200.3 | 198.4 | 197.0 |
| FEW 6 | 144.8 | 171.5 | 165.6 |
| TP17 Eastbound | 201.3 | 200.2 | 199.5 |
| FEW 3 | 139.6 | 169.7 | 163.8 |
| TP2 Westbound | 141.1 | 132.7 | 131.5 |
| TP2 Eastbound | 187.0 | 180.8 | 174.6 |
| AE7 Westbound | 180.3 | 174.8 | 171.7 |
| AE7 Eastbound | 185.5 | 176.5 | 173.2 |
| AE11 Westbound | 177.1 | 173.2 | 169.6 |

Supplementary Tables

Supplementary Table 86. Parameter specifications

| Parameter | Value | Unit |
| --- | --- | --- |
| Aspen Plus compressor isentropic efficiency | 0.8 | - |
| Aspen Plus compressor mechanical efficiency | 0.9 | - |
| Aspen Plus compressor model | isentropic using ASME method | |
| Number of compressor stages | 3 | - |
| Liquefaction pressure | 20.4 | bar |
| Liquefaction temperature | −28.9 | ℃ |
| USD exchang rate to Chinese YUAN | 7.2 | CNY/$ |
| Weight of a FEU container | 30.48 | tonne |

Supplementary Table 87. Nomenclature

| **Symbol** | **Description** |
| --- | --- |
|  | Boiler fuel consumption (tonne/GJ) |
|  | Coefficients for additional carbon emissions |
|  | Capture cost ($/tonne) |
|  | Cost of cargo loss per voyage ($) |
|  | Cost of onboard-scheme cargo loss ($/tonne CO2) |
|  | Cost of onshore-scheme cargo loss ($/tonne CO2) |
|  | Capture cost for onboard regeneration scheme ($/tonne CO2) |
|  | Capture cost for onshore regeneration scheme ($/tonne CO2) |
|  | Equipment cost per voyage ($) |
|  | Capital cost of the onboard absorber ($/tonne CO2) |
|  | Capital cost of onshore facilities ($/tonne CO2) |
|  | Capital cost of onboard SBCC equipment ($/tonne CO2) |
|  | Capital cost of onshore SBCC equipment ($/tonne CO2) |
|  | Cost of liquefaction per voyage ($) |
|  | Cost of onboard liquefaction per tonne of CO2 ($/tonne CO2) |
|  | Cost of onshore liquefaction per tonne of CO2 ($/tonne CO2) |
|  | Cost of regeneration per voyage ($) |
|  | Cost of onboard regeneration per tonne of CO2 ($/tonne CO2) |
|  | Cost of onshore regeneration per tonne of CO2 ($/tonne CO2) |
|  | Capture rate per segment |
|  | Cost of the SBCC system per voyage ($) |
|  | Cost of onboard SBCC system per voyage ($) |
|  | Cost of onshore SBCC system per voyage ($) |
|  | Cost of onboard cargo loss per segment ($) |
|  | Cost of onshore cargo loss per segment ($) |
|  | Carbon tax ($/tonne) |
| 𝐷 | Tank diameter (m) |
| *d* | Tank wall thickness (m) |
|  | Electricity emission factor (g CO2/kwh) |
|  | Global electricity emission factor (g CO2/kwh) |
|  | Emission factor (3.1 tonnes CO2 / 1.0 tonne fuel) |
|  | Electricity price ($/GJ) |
|  | Energy unit transfer factor |
|  | Daily additional fuel consumption (tonne/day) |
|  | Daily propulsion fuel consumption (tonne/day) |
| *f*STM,0 | Base value of the surrogate model for regeneration heat (GJ/tonne CO2) |
| *H* | Tank length (m) |
| ℎ | Straight-edge height of the tank head (mm) |
|  | Proportions of industrial energy consumption |
|  | Proportion of China’s industrial energy consumption |
|  | Proportion of Europe’s industrial energy consumption |
|  | Proportion of US’s industrial energy consumption |
|  | Liquefaction energy (GJ/tonne CO2) |
|  | Low-pressure steam price ($/GJ) |
|  | Engine maximum continuous rating (kw) |
|  | Total CO2 emissions per voyage (tonne) |
|  | Daily total CO2 emissions (tonne/day) |
|  | Daily additional CO2 emissions (tonne/day) |
|  | Daily additional CO2 emissions using MEA (tonne/day) |
|  | Daily propulsion-related CO2 emission (tonne/day) |
|  | Propulsion-related CO2 emission per segment (tonne) |
|  | Propulsion-related CO2 emission per voyage (tonne) |
|  | SBCC load per segment (tonne) |
|  | Captured CO2 per segment (tonne) |
|  | SBCC load of onboard regeneration per segment (tonne) |
|  | SBCC load of onshore regeneration per segment (tonne) |
|  | SBCC load of the segment with the maximum transportation days (tonne) |
|  | Weight of the storage tanks (tonne) |
| *OCR* | Overall capture rate for the voyage |
|  | Onshore-regeneration emission factor (tonne emitted/tonne captured) |
|  | Feed pressure (bar) for determining regeneration heat of MEA and PZ |
|  | Regeneration heat (GJ/tonne CO2) |
|  | Capture rate parameter for determining regeneration heat of MEA and PZ |
|  | Steam emission factor (g CO2/kwh) |
|  | China’s steam emission factor (g CO2/kwh) |
|  | Europe’s steam emission factor (g CO2/kwh) |
|  | Global steam emission factor (g CO2/kwh) |
|  | US’s steam emission factor (g CO2/kwh) |
|  | Specific fuel oil consumption (g/kWh) |
|  | Total cost with carbon tax ($) |
|  | Total cost for the onboard regeneration scheme ($) |
|  | Total cost for the onshore regeneration scheme ($) |
|  | Transportation days per segment (day) |
|  | Maximum transportation days per voyage (day) |
|  | Unit penalty ($/tonne CO2) |
|  | Maximum volume of the CO2 captured (m3) |
|  | Volume of the CO2 captured per segment (m3) |
|  | Volume of the CO2 storage tank (m3) |
|  | CO2 molar fraction |
| **Greek letter** | **Description** |
| *α* | Sensitivity coefficient for determining regeneration heat of MEA and PZ |
| *β* | Weighting factor for determining regeneration heat of MEA and PZ |
| *γ* | Volumetric CO2 absorption capacity (mol/L) |
|  | Engine load factor |
|  | Rich-solvent weight ratio (tonne rich-solvent/tonne CO2) |
|  | Density of liquefied CO2 (tonne/m³) |
|  | Load limit |
|  | Maximum SBCC-load-To-ship-net-tonnage ratio across the voyage |
|  | SBCC-load-To-ship-net-tonnage ratio for a segment |

**Supplemental References**

1. *MAERSK ENSHI DNV Vessel Register* (DNV). <https://vesselregister.dnv.com/vesselregister/details/37365>. (accessed 14 June 2024).

2. *DNV Vessel Register* (DNV); <https://vesselregister.dnv.com/vesselregister>. (accessed 14 June 2024).

3. *COSCO KOREA DNV Vessel Register* (DNV). <https://vesselregister.dnv.com/vesselregister/details/38731>. (accessed 14 June 2024).

4. *NORTHERN JAGUAR DNV Vessel Register* (DNV). <https://vesselregister.dnv.com/vesselregister/details/G114330>. (accessed 14 June 2024).

5. *MSC FEBE DNV Vessel Register* (DNV). <https://vesselregister.dnv.com/vesselregister/details/39598>. (accessed 14 June 2024).

6. *MAERSK CINCINNATI DNV Vessel Register* (DNV). <https://vesselregister.dnv.com/vesselregister/details/43631>. (accessed 14 June 2024).

7. *MAERSK HAMBURG ABS RECORD* (ABS). <https://absrecord.eagle.org/#/absrecord/details>. (accessed 14 June 2024).

8. *ABS RECORD, the online database for ABS vessel records* (ABS); <https://absrecord.eagle.org/#/absrecord/assets>. (accessed 14 June 2024).

9. *MAERSK TAIKUNG ABS RECORD* (ABS). <https://absrecord.eagle.org/#/absrecord/details>. (accessed 14 June 2024).

10. *MSC PALOMA DNV Vessel Register* (DNV). <https://vesselregister.dnv.com/vesselregister/details/G113679>. (accessed 14 June 2024).

11. *ClassNK Register of Ships - M/S MAERSK QINZHOU(CNo.202421)* (ClassNK). <https://www.classnk.or.jp/register/regships/one.aspx>. (accessed 14 June 2024).

12. *Register of Ships | ClassNK* (ClassNK); <https://www.classnk.or.jp/register/regships/regships.aspx>. (accessed 14 June 2024).

13. *GSL VINIA BV Fleet | Marine & Offshore* (BV). <https://marine-offshore.bureauveritas.com/bv-fleet/#/bv-fleet>. (accessed 14 June 2024).

14. *BV Fleet | Marine & Offshore* (BV); <https://marine-offshore.bureauveritas.com/bv-fleet/#/bv-fleet>. (accessed 14 June 2024).

15. *XIN HUANG PU Register of Ships* (CCS). <https://www.ccs.org.cn/ccswzen/internationalShipsList?columnid=201900002000000123&imono=9310044>. (accessed 13 June 2024).

16. *CCS Register of Ships* (CCS); <https://www.ccs.org.cn/ccswzen/internationalShipsList?columnid=201900002000000123>. (accessed 14 June 2024).

17. *REN JIAN 26 Register of Ships* (CCS). <https://www.ccs.org.cn/ccswzen/internationalShipsList?columnid=201900002000000123&imono=9450947>. (accessed 13 June 2024).

18. *ClassNK Register of Ships - M/S MAERSK NORESUND(CNo.212270)* (ClassNK). <https://www.classnk.or.jp/register/regships/one.aspx>. (accessed 14 June 2024).

19. *MAERSK NINGBO ABS RECORD* (ClassNK). <https://absrecord.eagle.org/#/absrecord/details>. (accessed 14 June 2024).

20. *Improved SFOC with G95ME-C9.6 Engines.* MAN Diesel & Turbo. <https://www.man-es.com/docs/default-source/marine/tools/improved-sfoc-with-g95me-c9.6-engines.pdf?sfvrsn=10c968a4_4> (2017).

21. Luo, X. & Wang, M. Study of solvent-based carbon capture for cargo ships through process modelling and simulation. *Applied Energy* **195**, 402-413 (2017).

22. *Four-stroke diesel engine compliant with IMO Tier II* MAN Energy Solutions. <https://www.man-es.com/docs/default-source/projectguidesde_projectguidesde_files/man-v28-33d-stc-imo-tier-ii-marine.pdf?sfvrsn=595f30f6_0> (2017).

23. *Marine Carbon Capture Technology Review.* United States Department of Transportation, Maritime Administration. <https://www.maritime.dot.gov/innovation/meta/feasibility-shipboard-carbon-capture-and-storage-ccs-technology> (2022).

24. Chung, W. & Lee, J. H. Input–Output Surrogate Models for Efficient Economic Evaluation of Amine Scrubbing CO2 Capture Processes. *Ind. Eng. Chem. Res.* (2020).

25. *Global 20 Ports Average Bunker Prices* (Ship & Bunker); <https://shipandbunker.com/prices/av/global/av-g20-global-20-ports-average>. (accessed 8 February 2024).

26. Liu, F., Qi, Z., Fang, M. & Ding, H. Pilot test of water-lean solvent of 2-(ethylamino) ethanol, 1-methyl-2-pyrrolidinone, and water for post-combustion CO2 capture. *Chemical Engineering Journal* **459** (2023).

27. El Hadri, N., Quang, D. V., Rayer, A. V. & Abu-Zahra, M. R. M. *Development of Amine-blend Systems for CO2 Post-Combustion Capture*. (Elsevier, 2015).

28. Trivedi, T. J., Lee, J. H., Lee, H. J., Jeong, Y. K. & Choi, J. W. Deep eutectic solvents as attractive media for CO2 capture. *Green Chemistry* **18**, 2834-2842 (2016).

29. MSC pioneers CO2 capture technology. (2023). <https://www.portnews.it/en/msc-pioneers-c02-capture-technology> (accessed 14 June 2024).

30. Tian, Z., Zhou, J., Zhang, Y. & Gao, W. Targeting zero energy increment for an onboard CO2 capture system: 4E analyses and multi-objective optimization. *Energy Conversion and Management* **301**, 117890 %U <https://linkinghub.elsevier.com/retrieve/pii/S0196890423012360> (2024).

31. Ding, X., Chen, H., Li, J. & Zhou, T. Comparative techno-economic analysis of CO2 capture processes using blended amines. *Carbon Capture Science & Technology* **9** (2023).

32. IEA. *World Energy Outlook 2024.* IEA. <https://www.iea.org/reports/world-energy-outlook-2024> (2024).

33. IEA. *Net Zero by 2050.* IEA. <https://www.iea.org/reports/net-zero-by-2050> (2021).

34. Hu, Y., Gani, R., Sundmacher, K. & Zhou, T. Assessing the future impact of 12 direct air capture technologies. *Chemical Engineering Science* **298** (2024).

35. *North America – Countries & Regions – Energy consumption by sector* (IEA); <https://www.iea.org/regions/north-america/energy-mix>. (accessed 25 Oct 2024).

36. *Europe – Countries & Regions – Energy consumption by sector* (IEA); <https://www.iea.org/regions/europe/energy-mix>. (accessed 25 Oct 2024).

37. *China - Countries & Regions - Energy consumption by sector* (IEA); <https://www.iea.org/countries/china/energy-mix>. (accessed 25 Oct 2024).

1. ORC and LNG are not incorporated in our ship-based carbon capture system, thus the corresponding equipment cost should be excluded from calculation. [↑](#footnote-ref-2)
