# Supplementary material for: Rethinking Maritime Carbon Capture: Onshore versus Onboard Solvent Regeneration
Source: Research Square preprint supplement (doi:10.21203/rs.3.rs-7076698/v1), 2025-07-31
Supplement: Supplementary file 2 [file e21c8d9a51f38701286b3a6b.xlsx]

## Sheet: Supplementary Data 1
		Supplementary Data 1: Onboard regeneration (for 16 representative routes)										10% load limit for onboard regeneration scheme																												20% load limit for onboard regeneration scheme
				Propulsion CO2 emissions per segment (tonne)				Daily propulsion-related CO2 emissions (tonne/day)				Daily additional CO2 emissions (tonne/day)				Daily total CO2 emissions (tonne/day)				Additional CO2 emissions per segment (tonne)				Total CO2 emissions per segment (tonne)				Daily CO2 captured (tonne/day)				SBCC load per segment (tonne)				Capture rate per segment				Daily additional CO2 emissions (tonne/day)				Daily total CO2 emissions (tonne/day)				Additional CO2 emissions per segment (tonne)
		FEW 3	Transportation days per segment (days)	MEA	PZ	NE-2	DES	MEA	PZ	NE-2	DES	MEA	PZ	NE-2	DES	MEA	PZ	NE-2	DES	MEA	PZ	NE-2	DES	MEA	PZ	NE-2	DES	MEA	PZ	NE-2	DES	MEA	PZ	NE-2	DES	MEA	PZ	NE-2	DES	MEA	PZ	NE-2	DES	MEA	PZ	NE-2	DES	MEA	PZ
		Qingdao	-	0	0	0	0	0	0	0	0	0	0	0	0	0	0	0	0	0	0	0	0	0	0	0	0	0	0	0	0	0	0	0	0	0	0	0	0	0	0	0	0	0	0	0	0	0	0
		Gwangyang	2	1389.05	1389.05	1389.05	1389.05	694.527	694.527	694.527	694.527	505.416	326.086	228.432	326.086	1199.94	1020.61	922.959	1020.61	1010.83	652.172	456.865	652.172	2399.89	2041.23	1845.92	2041.23	1079.95	918.551	830.663	918.551	4591.49	4268.7	4092.92	4268.7	0.9	0.9	0.9	0.9	505.416	326.086	228.432	326.086	1199.94	1020.61	922.959	1020.61	1010.83	652.172
		Shanghai	3	2083.58	2083.58	2083.58	2083.58	694.527	694.527	694.527	694.527	505.416	326.086	228.432	326.086	1199.94	1020.61	922.959	1020.61	1516.25	978.257	685.297	978.257	3599.83	3061.84	2768.88	3061.84	1079.95	918.551	830.663	918.551	5671.44	5187.25	4923.58	5187.25	0.9	0.9	0.9	0.9	505.416	326.086	228.432	326.086	1199.94	1020.61	922.959	1020.61	1516.25	978.257
		Ningbo	2	1389.05	1389.05	1389.05	1389.05	694.527	694.527	694.527	694.527	505.416	326.086	228.432	326.086	1199.94	1020.61	922.959	1020.61	1010.83	652.172	456.865	652.172	2399.89	2041.23	1845.92	2041.23	1079.95	918.551	830.663	918.551	4591.49	4268.7	4092.92	4268.7	0.9	0.9	0.9	0.9	505.416	326.086	228.432	326.086	1199.94	1020.61	922.959	1020.61	1010.83	652.172
		Shekou	4	2778.11	2778.11	2778.11	2778.11	694.527	694.527	694.527	694.527	471.171	326.086	228.432	326.086	1165.7	1020.61	922.959	1020.61	1884.69	1304.34	913.73	1304.34	4662.79	4082.45	3691.84	4082.45	1006.78	918.551	830.663	918.551	6458.7	6105.8	5754.25	6105.8	0.863668	0.9	0.9	0.9	505.416	326.086	228.432	326.086	1199.94	1020.61	922.959	1020.61	2021.66	1304.34
		Nansha New Port	1	694.527	694.527	694.527	694.527	694.527	694.527	694.527	694.527	505.416	326.086	228.432	326.086	1199.94	1020.61	922.959	1020.61	505.416	326.086	228.432	326.086	1199.94	1020.61	922.959	1020.61	1079.95	918.551	830.663	918.551	3511.54	3350.15	3262.26	3350.15	0.9	0.9	0.9	0.9	505.416	326.086	228.432	326.086	1199.94	1020.61	922.959	1020.61	505.416	326.086
		Singapore	6	4167.16	4167.16	4167.16	4167.16	694.527	694.527	694.527	694.527	314.114	238.27	184.576	238.27	1008.64	932.797	879.103	932.797	1884.69	1429.62	1107.45	1429.62	6051.85	5596.78	5274.62	5596.78	671.184	671.184	671.184	671.184	6458.7	6458.7	6458.7	6458.7	0.665434	0.719539	0.763488	0.719539	505.416	326.086	228.432	326.086	1199.94	1020.61	922.959	1020.61	3032.5	1956.51
		Tanjung Pelepas	2	1389.05	1389.05	1389.05	1389.05	694.527	694.527	694.527	694.527	505.416	326.086	228.432	326.086	1199.94	1020.61	922.959	1020.61	1010.83	652.172	456.865	652.172	2399.89	2041.23	1845.92	2041.23	1079.95	918.551	830.663	918.551	4591.49	4268.7	4092.92	4268.7	0.9	0.9	0.9	0.9	505.416	326.086	228.432	326.086	1199.94	1020.61	922.959	1020.61	1010.83	652.172
		Tema	22	15279.6	15279.6	15279.6	15279.6	694.527	694.527	694.527	694.527	85.6675	64.9828	50.3388	64.9828	780.195	759.51	744.866	759.51	1884.69	1429.62	1107.45	1429.62	17164.3	16709.2	16387	16709.2	183.05	183.05	183.05	183.05	6458.7	6458.7	6458.7	6458.7	0.234621	0.241011	0.245749	0.241011	195.887	148.59	115.105	148.59	890.414	843.117	809.632	843.117	4309.52	3268.97
		Lekki	5	3472.63	3472.63	3472.63	3472.63	694.527	694.527	694.527	694.527	376.937	285.925	221.491	285.925	1071.46	980.452	916.018	980.452	1884.69	1429.62	1107.45	1429.62	5357.32	4902.26	4580.09	4902.26	805.421	805.421	805.421	805.421	6458.7	6458.7	6458.7	6458.7	0.751702	0.82148	0.879264	0.82148	505.416	326.086	228.432	326.086	1199.94	1020.61	922.959	1020.61	2527.08	1630.43
		Abidjan	3	2083.58	2083.58	2083.58	2083.58	694.527	694.527	694.527	694.527	505.416	326.086	228.432	326.086	1199.94	1020.61	922.959	1020.61	1516.25	978.257	685.297	978.257	3599.83	3061.84	2768.88	3061.84	1079.95	918.551	830.663	918.551	5671.44	5187.25	4923.58	5187.25	0.9	0.9	0.9	0.9	505.416	326.086	228.432	326.086	1199.94	1020.61	922.959	1020.61	1516.25	978.257
		Pointe Noire	7	4861.69	4861.69	4861.69	4861.69	694.527	694.527	694.527	694.527	269.241	204.232	158.208	204.232	963.768	898.759	852.735	898.759	1884.69	1429.62	1107.45	1429.62	6746.37	6291.31	5969.14	6291.31	575.301	575.301	575.301	575.301	6458.7	6458.7	6458.7	6458.7	0.596929	0.640106	0.674654	0.640106	505.416	326.086	228.432	326.086	1199.94	1020.61	922.959	1020.61	3537.91	2282.6
		Colombo	20	13890.5	13890.5	13890.5	13890.5	694.527	694.527	694.527	694.527	94.2343	71.4811	55.3727	71.4811	788.761	766.008	749.9	766.008	1884.69	1429.62	1107.45	1429.62	15775.2	15320.2	14998	15320.2	201.355	201.355	201.355	201.355	6458.7	6458.7	6458.7	6458.7	0.25528	0.262863	0.26851	0.262863	215.476	163.449	126.615	163.449	910.003	857.976	821.142	857.976	4309.52	3268.97
		Singapore	5	3472.63	3472.63	3472.63	3472.63	694.527	694.527	694.527	694.527	376.937	285.925	221.491	285.925	1071.46	980.452	916.018	980.452	1884.69	1429.62	1107.45	1429.62	5357.32	4902.26	4580.09	4902.26	805.421	805.421	805.421	805.421	6458.7	6458.7	6458.7	6458.7	0.751702	0.82148	0.879264	0.82148	505.416	326.086	228.432	326.086	1199.94	1020.61	922.959	1020.61	2527.08	1630.43
		Xiamen	6	4167.16	4167.16	4167.16	4167.16	694.527	694.527	694.527	694.527	314.114	238.27	184.576	238.27	1008.64	932.797	879.103	932.797	1884.69	1429.62	1107.45	1429.62	6051.85	5596.78	5274.62	5596.78	671.184	671.184	671.184	671.184	6458.7	6458.7	6458.7	6458.7	0.665434	0.719539	0.763488	0.719539	505.416	326.086	228.432	326.086	1199.94	1020.61	922.959	1020.61	3032.5	1956.51
		Total/voyage	88	61118.4	61118.4	61118.4	61118.4													21647.9	15550.8	11635.5	15550.8	82766.3	76669.2	72753.9	76669.2					48687.8	46236.7	44742.6	46236.7	0.558877	0.571352	0.581564	0.571352									31868.2	21537.9
		FEW 6	Transportation days per segment (days)	MEA	PZ	NE-2	DES	MEA	PZ	NE-2	DES	MEA	PZ	NE-2	DES	MEA	PZ	NE-2	DES	MEA	PZ	NE-2	DES	MEA	PZ	NE-2	DES	MEA	PZ	NE-2	DES	MEA	PZ	NE-2	DES	MEA	PZ	NE-2	DES	MEA	PZ	NE-2	DES	MEA	PZ	NE-2	DES	MEA	PZ
		Qingdao	-	0	0	0	0	0	0	0	0	0	0	0	0	0	0	0	0	0	0	0	0	0	0	0	0	0	0	0	0	0	0	0	0	0	0	0	0	0	0	0	0	0	0	0	0	0	0
		Shanghai	3	2010.12	2010.12	2010.12	2010.12	670.04	670.04	670.04	670.04	487.597	314.589	220.379	314.589	1157.64	984.63	890.419	984.63	1462.79	943.767	661.136	943.767	3472.91	2953.89	2671.26	2953.89	1041.87	886.167	801.377	886.167	5363.89	4896.77	4642.4	4896.77	0.9	0.9	0.9	0.9	487.597	314.589	220.379	314.589	1157.64	984.63	890.419	984.63	1462.79	943.767
		Ningbo	1	670.04	670.04	670.04	670.04	670.04	670.04	670.04	670.04	487.597	314.589	220.379	314.589	1157.64	984.63	890.419	984.63	487.597	314.589	220.379	314.589	1157.64	984.63	890.419	984.63	1041.87	886.167	801.377	886.167	3280.15	3124.44	3039.65	3124.44	0.9	0.9	0.9	0.9	487.597	314.589	220.379	314.589	1157.64	984.63	890.419	984.63	487.597	314.589
		Nansha New Port	4	2680.16	2680.16	2680.16	2680.16	670.04	670.04	670.04	670.04	386.899	293.481	220.379	293.481	1056.94	963.521	890.419	963.521	1547.6	1173.92	881.515	1173.92	4227.76	3854.09	3561.68	3854.09	826.707	826.707	801.377	826.707	5545.1	5545.1	5443.78	5545.1	0.782171	0.858006	0.9	0.858006	487.597	314.589	220.379	314.589	1157.64	984.63	890.419	984.63	1950.39	1258.36
		Tanjung Pelepas	5	3350.2	3350.2	3350.2	3350.2	670.04	670.04	670.04	670.04	309.519	234.785	181.876	234.785	979.56	904.825	851.916	904.825	1547.6	1173.92	909.378	1173.92	4897.8	4524.13	4259.58	4524.13	661.366	661.366	661.366	661.366	5545.1	5545.1	5545.1	5545.1	0.675166	0.730932	0.776327	0.730932	487.597	314.589	220.379	314.589	1157.64	984.63	890.419	984.63	2437.98	1572.95
		Singapore	1	670.04	670.04	670.04	670.04	670.04	670.04	670.04	670.04	487.597	314.589	220.379	314.589	1157.64	984.63	890.419	984.63	487.597	314.589	220.379	314.589	1157.64	984.63	890.419	984.63	1041.87	886.167	801.377	886.167	3280.15	3124.44	3039.65	3124.44	0.9	0.9	0.9	0.9	487.597	314.589	220.379	314.589	1157.64	984.63	890.419	984.63	487.597	314.589
		Pointe Noire	24	16081	16081	16081	16081	670.04	670.04	670.04	670.04	64.4832	48.9135	37.8907	48.9135	734.524	718.954	707.931	718.954	1547.6	1173.92	909.378	1173.92	17628.6	17254.9	16990.3	17254.9	137.785	137.785	137.785	137.785	5545.1	5545.1	5545.1	5545.1	0.187584	0.191646	0.19463	0.191646	149.331	113.275	87.7479	113.275	819.371	783.315	757.788	783.315	3583.94	2718.59
		Kribi	4	2680.16	2680.16	2680.16	2680.16	670.04	670.04	670.04	670.04	386.899	293.481	220.379	293.481	1056.94	963.521	890.419	963.521	1547.6	1173.92	881.515	1173.92	4227.76	3854.09	3561.68	3854.09	826.707	826.707	801.377	826.707	5545.1	5545.1	5443.78	5545.1	0.782171	0.858006	0.9	0.858006	487.597	314.589	220.379	314.589	1157.64	984.63	890.419	984.63	1950.39	1258.36
		Luanda	5	3350.2	3350.2	3350.2	3350.2	670.04	670.04	670.04	670.04	309.519	234.785	181.876	234.785	979.56	904.825	851.916	904.825	1547.6	1173.92	909.378	1173.92	4897.8	4524.13	4259.58	4524.13	661.366	661.366	661.366	661.366	5545.1	5545.1	5545.1	5545.1	0.675166	0.730932	0.776327	0.730932	487.597	314.589	220.379	314.589	1157.64	984.63	890.419	984.63	2437.98	1572.95
		Walvis Bay	8	5360.32	5360.32	5360.32	5360.32	670.04	670.04	670.04	670.04	193.449	146.741	113.672	146.741	863.49	816.781	783.713	816.781	1547.6	1173.92	909.378	1173.92	6907.92	6534.25	6269.7	6534.25	413.354	413.354	413.354	413.354	5545.1	5545.1	5545.1	5545.1	0.478701	0.506076	0.52743	0.506076	447.993	314.589	220.379	314.589	1118.03	984.63	890.419	984.63	3583.94	2516.71
		Total/voyage	55	36852.2	36852.2	36852.2	36852.2													11723.6	8616.49	6502.44	8616.49	48575.8	45468.7	43354.7	45468.7					45194.8	44416.2	43789.7	44416.2	0.515696	0.533813	0.54539	0.533813									18382.6	12470.9
		TP17 Eastbound	Transportation days per segment (days)	MEA	PZ	NE-2	DES	MEA	PZ	NE-2	DES	MEA	PZ	NE-2	DES	MEA	PZ	NE-2	DES	MEA	PZ	NE-2	DES	MEA	PZ	NE-2	DES	MEA	PZ	NE-2	DES	MEA	PZ	NE-2	DES	MEA	PZ	NE-2	DES	MEA	PZ	NE-2	DES	MEA	PZ	NE-2	DES	MEA	PZ
		Hong Kong	-	0	0	0	0	0	0	0	0	0	0	0	0	0	0	0	0	0	0	0	0	0	0	0	0	0	0	0	0	0	0	0	0	0	0	0	0	0	0	0	0	0	0	0	0	0	0
		Nansha New Port	1	577.761	577.761	577.761	577.761	577.761	577.761	577.761	577.761	420.444	271.263	190.028	271.263	998.204	849.024	767.788	849.024	420.444	271.263	190.028	271.263	998.204	849.024	767.788	849.024	898.384	764.121	691.009	764.121	3119.6	2985.34	2912.23	2985.34	0.9	0.9	0.9	0.9	420.444	271.263	190.028	271.263	998.204	849.024	767.788	849.024	420.444	271.263
		Yantian	2	1155.52	1155.52	1155.52	1155.52	577.761	577.761	577.761	577.761	420.444	271.263	190.028	271.263	998.204	849.024	767.788	849.024	840.887	542.526	380.055	542.526	1996.41	1698.05	1535.58	1698.05	898.384	764.121	691.009	764.121	4017.98	3749.46	3603.23	3749.46	0.9	0.9	0.9	0.9	420.444	271.263	190.028	271.263	998.204	849.024	767.788	849.024	840.887	542.526
		Vung Tau	3	1733.28	1733.28	1733.28	1733.28	577.761	577.761	577.761	577.761	420.444	271.263	190.028	271.263	998.204	849.024	767.788	849.024	1261.33	813.789	570.083	813.789	2994.61	2547.07	2303.36	2547.07	898.384	764.121	691.009	764.121	4916.37	4513.58	4294.24	4513.58	0.9	0.9	0.9	0.9	420.444	271.263	190.028	271.263	998.204	849.024	767.788	849.024	1261.33	813.789
		Singapore	2	1155.52	1155.52	1155.52	1155.52	577.761	577.761	577.761	577.761	420.444	271.263	190.028	271.263	998.204	849.024	767.788	849.024	840.887	542.526	380.055	542.526	1996.41	1698.05	1535.58	1698.05	898.384	764.121	691.009	764.121	4017.98	3749.46	3603.23	3749.46	0.9	0.9	0.9	0.9	420.444	271.263	190.028	271.263	998.204	849.024	767.788	849.024	840.887	542.526
		Newark	25	14444	14444	14444	14444	577.761	577.761	577.761	577.761	61.1617	46.394	35.939	46.394	638.922	624.155	613.7	624.155	1529.04	1159.85	898.476	1159.85	15973.1	15603.9	15342.5	15603.9	130.687	130.687	130.687	130.687	5488.4	5488.4	5488.4	5488.4	0.204543	0.209383	0.21295	0.209383	141.708	107.492	83.2686	107.492	719.469	685.253	661.029	685.253	3542.7	2687.3
		Charleston	4	2311.04	2311.04	2311.04	2311.04	577.761	577.761	577.761	577.761	382.261	271.263	190.028	271.263	960.021	849.024	767.788	849.024	1529.04	1085.05	760.11	1085.05	3840.08	3396.09	3071.15	3396.09	816.796	764.121	691.009	764.121	5488.4	5277.7	4985.25	5277.7	0.85081	0.9	0.9	0.9	420.444	271.263	190.028	271.263	998.204	849.024	767.788	849.024	1681.77	1085.05
		Savannah	2	1155.52	1155.52	1155.52	1155.52	577.761	577.761	577.761	577.761	420.444	271.263	190.028	271.263	998.204	849.024	767.788	849.024	840.887	542.526	380.055	542.526	1996.41	1698.05	1535.58	1698.05	898.384	764.121	691.009	764.121	4017.98	3749.46	3603.23	3749.46	0.9	0.9	0.9	0.9	420.444	271.263	190.028	271.263	998.204	849.024	767.788	849.024	840.887	542.526
		Miami	3	1733.28	1733.28	1733.28	1733.28	577.761	577.761	577.761	577.761	420.444	271.263	190.028	271.263	998.204	849.024	767.788	849.024	1261.33	813.789	570.083	813.789	2994.61	2547.07	2303.36	2547.07	898.384	764.121	691.009	764.121	4916.37	4513.58	4294.24	4513.58	0.9	0.9	0.9	0.9	420.444	271.263	190.028	271.263	998.204	849.024	767.788	849.024	1261.33	813.789
		Freeport	2	1155.52	1155.52	1155.52	1155.52	577.761	577.761	577.761	577.761	420.444	271.263	190.028	271.263	998.204	849.024	767.788	849.024	840.887	542.526	380.055	542.526	1996.41	1698.05	1535.58	1698.05	898.384	764.121	691.009	764.121	4017.98	3749.46	3603.23	3749.46	0.9	0.9	0.9	0.9	420.444	271.263	190.028	271.263	998.204	849.024	767.788	849.024	840.887	542.526
		Total/voyage	44	25421.5	25421.5	25421.5	25421.5													9364.74	6313.85	4509	6313.85	34786.2	31735.3	29930.5	31735.3					40001.1	37776.4	36387.3	37776.4	0.575232	0.560432	0.547815	0.560432									11531.1	7841.3
		AE11 Westbound	Transportation days per segment (days)	MEA	PZ	NE-2	DES	MEA	PZ	NE-2	DES	MEA	PZ	NE-2	DES	MEA	PZ	NE-2	DES	MEA	PZ	NE-2	DES	MEA	PZ	NE-2	DES	MEA	PZ	NE-2	DES	MEA	PZ	NE-2	DES	MEA	PZ	NE-2	DES	MEA	PZ	NE-2	DES	MEA	PZ	NE-2	DES	MEA	PZ
		Qingdao	-	0	0	0	0	0	0	0	0	0	0	0	0	0	0	0	0	0	0	0	0	0	0	0	0	0	0	0	0	0	0	0	0	0	0	0	0	0	0	0	0	0	0	0	0	0	0
		Busan	3	2293.94	2293.94	2293.94	2293.94	764.647	764.647	764.647	764.647	556.444	359.008	251.495	359.008	1321.09	1123.66	1016.14	1123.66	1669.33	1077.02	754.486	1077.02	3963.27	3370.97	3048.43	3370.97	1188.98	1011.29	914.529	1011.29	7253.89	6720.81	6430.53	6720.81	0.9	0.9	0.9	0.9	556.444	359.008	251.495	359.008	1321.09	1123.66	1016.14	1123.66	1669.33	1077.02
		Ningbo	5	3823.24	3823.24	3823.24	3823.24	764.647	764.647	764.647	764.647	556.444	359.008	251.495	359.008	1321.09	1123.66	1016.14	1123.66	2782.22	1795.04	1257.48	1795.04	6605.46	5618.28	5080.71	5618.28	1188.98	1011.29	914.529	1011.29	9631.85	8743.39	8259.58	8743.39	0.9	0.9	0.9	0.9	556.444	359.008	251.495	359.008	1321.09	1123.66	1016.14	1123.66	2782.22	1795.04
		Shanghai	3	2293.94	2293.94	2293.94	2293.94	764.647	764.647	764.647	764.647	556.444	359.008	251.495	359.008	1321.09	1123.66	1016.14	1123.66	1669.33	1077.02	754.486	1077.02	3963.27	3370.97	3048.43	3370.97	1188.98	1011.29	914.529	1011.29	7253.89	6720.81	6430.53	6720.81	0.9	0.9	0.9	0.9	556.444	359.008	251.495	359.008	1321.09	1123.66	1016.14	1123.66	1669.33	1077.02
		Xiamen	4	3058.59	3058.59	3058.59	3058.59	764.647	764.647	764.647	764.647	556.444	359.008	251.495	359.008	1321.09	1123.66	1016.14	1123.66	2225.77	1436.03	1005.98	1436.03	5284.36	4494.62	4064.57	4494.62	1188.98	1011.29	914.529	1011.29	8442.87	7732.1	7345.05	7732.1	0.9	0.9	0.9	0.9	556.444	359.008	251.495	359.008	1321.09	1123.66	1016.14	1123.66	2225.77	1436.03
		Nansha New Port	1	764.647	764.647	764.647	764.647	764.647	764.647	764.647	764.647	556.444	359.008	251.495	359.008	1321.09	1123.66	1016.14	1123.66	556.444	359.008	251.495	359.008	1321.09	1123.66	1016.14	1123.66	1188.98	1011.29	914.529	1011.29	4875.92	4698.23	4601.47	4698.23	0.9	0.9	0.9	0.9	556.444	359.008	251.495	359.008	1321.09	1123.66	1016.14	1123.66	556.444	359.008
		Yantian	1	764.647	764.647	764.647	764.647	764.647	764.647	764.647	764.647	556.444	359.008	251.495	359.008	1321.09	1123.66	1016.14	1123.66	556.444	359.008	251.495	359.008	1321.09	1123.66	1016.14	1123.66	1188.98	1011.29	914.529	1011.29	4875.92	4698.23	4601.47	4698.23	0.9	0.9	0.9	0.9	556.444	359.008	251.495	359.008	1321.09	1123.66	1016.14	1123.66	556.444	359.008
		Singapore	5	3823.24	3823.24	3823.24	3823.24	764.647	764.647	764.647	764.647	556.444	359.008	251.495	359.008	1321.09	1123.66	1016.14	1123.66	2782.22	1795.04	1257.48	1795.04	6605.46	5618.28	5080.71	5618.28	1188.98	1011.29	914.529	1011.29	9631.85	8743.39	8259.58	8743.39	0.9	0.9	0.9	0.9	556.444	359.008	251.495	359.008	1321.09	1123.66	1016.14	1123.66	2782.22	1795.04
		Port Said East	15	11469.7	11469.7	11469.7	11469.7	764.647	764.647	764.647	764.647	298.505	226.43	175.403	226.43	1063.15	991.077	940.051	991.077	4477.57	3396.45	2631.05	3396.45	15947.3	14866.2	14100.8	14866.2	637.831	637.831	637.831	637.831	13254.4	13254.4	13254.4	13254.4	0.599943	0.643573	0.678506	0.643573	556.444	359.008	251.495	359.008	1321.09	1123.66	1016.14	1123.66	8346.65	5385.12
		Gioia Tauro	4	3058.59	3058.59	3058.59	3058.59	764.647	764.647	764.647	764.647	556.444	359.008	251.495	359.008	1321.09	1123.66	1016.14	1123.66	2225.77	1436.03	1005.98	1436.03	5284.36	4494.62	4064.57	4494.62	1188.98	1011.29	914.529	1011.29	8442.87	7732.1	7345.05	7732.1	0.9	0.9	0.9	0.9	556.444	359.008	251.495	359.008	1321.09	1123.66	1016.14	1123.66	2225.77	1436.03
		Barcelona	4	3058.59	3058.59	3058.59	3058.59	764.647	764.647	764.647	764.647	556.444	359.008	251.495	359.008	1321.09	1123.66	1016.14	1123.66	2225.77	1436.03	1005.98	1436.03	5284.36	4494.62	4064.57	4494.62	1188.98	1011.29	914.529	1011.29	8442.87	7732.1	7345.05	7732.1	0.9	0.9	0.9	0.9	556.444	359.008	251.495	359.008	1321.09	1123.66	1016.14	1123.66	2225.77	1436.03
		Valencia	4	3058.59	3058.59	3058.59	3058.59	764.647	764.647	764.647	764.647	556.444	359.008	251.495	359.008	1321.09	1123.66	1016.14	1123.66	2225.77	1436.03	1005.98	1436.03	5284.36	4494.62	4064.57	4494.62	1188.98	1011.29	914.529	1011.29	8442.87	7732.1	7345.05	7732.1	0.9	0.9	0.9	0.9	556.444	359.008	251.495	359.008	1321.09	1123.66	1016.14	1123.66	2225.77	1436.03
		Total/voyage	49	37467.7	37467.7	37467.7	37467.7													23396.7	15602.7	11181.9	15602.7	60864.4	53070.4	48649.6	53070.4					90549.2	84507.7	81217.8	84507.7	0.821381	0.828169	0.835802	0.828169									27265.7	17591.4
		AE7 Eastbound	Transportation days per segment (days)	MEA	PZ	NE-2	DES	MEA	PZ	NE-2	DES	MEA	PZ	NE-2	DES	MEA	PZ	NE-2	DES	MEA	PZ	NE-2	DES	MEA	PZ	NE-2	DES	MEA	PZ	NE-2	DES	MEA	PZ	NE-2	DES	MEA	PZ	NE-2	DES	MEA	PZ	NE-2	DES	MEA	PZ	NE-2	DES	MEA	PZ
		Hamburg	-	0	0	0	0	0	0	0	0	0	0	0	0	0	0	0	0	0	0	0	0	0	0	0	0	0	0	0	0	0	0	0	0	0	0	0	0	0	0	0	0	0	0	0	0	0	0
		Antwerp	2	1112.21	1112.21	1112.21	1112.21	556.107	556.107	556.107	556.107	404.686	261.097	182.906	261.097	960.793	817.204	739.013	817.204	809.372	522.193	365.811	522.193	1921.59	1634.41	1478.03	1634.41	864.714	735.484	665.112	735.484	4474.51	4216.04	4075.3	4216.04	0.9	0.9	0.9	0.9	404.686	261.097	182.906	261.097	960.793	817.204	739.013	817.204	809.372	522.193
		London Gateway	2	1112.21	1112.21	1112.21	1112.21	556.107	556.107	556.107	556.107	404.686	261.097	182.906	261.097	960.793	817.204	739.013	817.204	809.372	522.193	365.811	522.193	1921.59	1634.41	1478.03	1634.41	864.714	735.484	665.112	735.484	4474.51	4216.04	4075.3	4216.04	0.9	0.9	0.9	0.9	404.686	261.097	182.906	261.097	960.793	817.204	739.013	817.204	809.372	522.193
		Le Havre	2	1112.21	1112.21	1112.21	1112.21	556.107	556.107	556.107	556.107	404.686	261.097	182.906	261.097	960.793	817.204	739.013	817.204	809.372	522.193	365.811	522.193	1921.59	1634.41	1478.03	1634.41	864.714	735.484	665.112	735.484	4474.51	4216.04	4075.3	4216.04	0.9	0.9	0.9	0.9	404.686	261.097	182.906	261.097	960.793	817.204	739.013	817.204	809.372	522.193
		Port Tangier Mediterranee	7	3892.75	3892.75	3892.75	3892.75	556.107	556.107	556.107	556.107	346.482	261.097	182.906	261.097	902.589	817.204	739.013	817.204	2425.37	1827.68	1280.34	1827.68	6318.12	5720.43	5173.09	5720.43	740.346	735.484	665.112	735.484	7927.5	7893.46	7400.86	7893.46	0.820247	0.9	0.9	0.9	404.686	261.097	182.906	261.097	960.793	817.204	739.013	817.204	2832.8	1827.68
		Jeddah	9	5004.97	5004.97	5004.97	5004.97	556.107	556.107	556.107	556.107	269.486	204.418	158.352	204.418	825.593	760.525	714.459	760.525	2425.37	1839.76	1425.17	1839.76	7430.34	6844.73	6430.13	6844.73	575.825	575.825	575.825	575.825	7927.5	7927.5	7927.5	7927.5	0.697468	0.757141	0.805959	0.757141	404.686	261.097	182.906	261.097	960.793	817.204	739.013	817.204	3642.18	2349.87
		Abu Dhabi	7	3892.75	3892.75	3892.75	3892.75	556.107	556.107	556.107	556.107	346.482	261.097	182.906	261.097	902.589	817.204	739.013	817.204	2425.37	1827.68	1280.34	1827.68	6318.12	5720.43	5173.09	5720.43	740.346	735.484	665.112	735.484	7927.5	7893.46	7400.86	7893.46	0.820247	0.9	0.9	0.9	404.686	261.097	182.906	261.097	960.793	817.204	739.013	817.204	2832.8	1827.68
		Jebel Ali	2	1112.21	1112.21	1112.21	1112.21	556.107	556.107	556.107	556.107	404.686	261.097	182.906	261.097	960.793	817.204	739.013	817.204	809.372	522.193	365.811	522.193	1921.59	1634.41	1478.03	1634.41	864.714	735.484	665.112	735.484	4474.51	4216.04	4075.3	4216.04	0.9	0.9	0.9	0.9	404.686	261.097	182.906	261.097	960.793	817.204	739.013	817.204	809.372	522.193
		Ningbo	18	10009.9	10009.9	10009.9	10009.9	556.107	556.107	556.107	556.107	134.743	102.209	79.1759	102.209	690.85	658.316	635.283	658.316	2425.37	1839.76	1425.17	1839.76	12435.3	11849.7	11435.1	11849.7	287.912	287.912	287.912	287.912	7927.5	7927.5	7927.5	7927.5	0.416751	0.437347	0.453203	0.437347	303.985	230.587	178.623	230.587	860.092	786.694	734.731	786.694	5471.72	4150.56
		Shanghai	3	1668.32	1668.32	1668.32	1668.32	556.107	556.107	556.107	556.107	404.686	261.097	182.906	261.097	960.793	817.204	739.013	817.204	1214.06	783.29	548.717	783.29	2882.38	2451.61	2217.04	2451.61	864.714	735.484	665.112	735.484	5339.22	4951.53	4740.41	4951.53	0.9	0.9	0.9	0.9	404.686	261.097	182.906	261.097	960.793	817.204	739.013	817.204	1214.06	783.29
		Nansha New Port	4	2224.43	2224.43	2224.43	2224.43	556.107	556.107	556.107	556.107	404.686	261.097	182.906	261.097	960.793	817.204	739.013	817.204	1618.74	1044.39	731.623	1044.39	3843.17	3268.82	2956.05	3268.82	864.714	735.484	665.112	735.484	6203.93	5687.01	5405.52	5687.01	0.9	0.9	0.9	0.9	404.686	261.097	182.906	261.097	960.793	817.204	739.013	817.204	1618.74	1044.39
		Yantian	1	556.107	556.107	556.107	556.107	556.107	556.107	556.107	556.107	404.686	261.097	182.906	261.097	960.793	817.204	739.013	817.204	404.686	261.097	182.906	261.097	960.793	817.204	739.013	817.204	864.714	735.484	665.112	735.484	3609.79	3480.56	3410.19	3480.56	0.9	0.9	0.9	0.9	404.686	261.097	182.906	261.097	960.793	817.204	739.013	817.204	404.686	261.097
		Total/voyage	57	31698.1	31698.1	31698.1	31698.1													16176.5	11512.4	8337.5	11512.4	47874.6	43210.5	40035.6	43210.5					64761	62625.2	60514	62625.2	0.721993	0.750496	0.757281	0.750496									21254.5	14333.3
		AE7 Westbound	Transportation days per segment (days)	MEA	PZ	NE-2	DES	MEA	PZ	NE-2	DES	MEA	PZ	NE-2	DES	MEA	PZ	NE-2	DES	MEA	PZ	NE-2	DES	MEA	PZ	NE-2	DES	MEA	PZ	NE-2	DES	MEA	PZ	NE-2	DES	MEA	PZ	NE-2	DES	MEA	PZ	NE-2	DES	MEA	PZ	NE-2	DES	MEA	PZ
		Ningbo	-	0	0	0	0	0	0	0	0	0	0	0	0	0	0	0	0	0	0	0	0	0	0	0	0	0	0	0	0	0	0	0	0	0	0	0	0	0	0	0	0	0	0	0	0	0	0
		Shanghai	2	1112.21	1112.21	1112.21	1112.21	556.107	556.107	556.107	556.107	404.686	261.097	182.906	261.097	960.793	817.204	739.013	817.204	809.372	522.193	365.811	522.193	1921.59	1634.41	1478.03	1634.41	864.714	735.484	665.112	735.484	4474.26	4215.8	4075.06	4215.8	0.9	0.9	0.9	0.9	404.686	261.097	182.906	261.097	960.793	817.204	739.013	817.204	809.372	522.193
		Nansha New Port	3	1668.32	1668.32	1668.32	1668.32	556.107	556.107	556.107	556.107	404.686	261.097	182.906	261.097	960.793	817.204	739.013	817.204	1214.06	783.29	548.717	783.29	2882.38	2451.61	2217.04	2451.61	864.714	735.484	665.112	735.484	5338.98	4951.29	4740.17	4951.29	0.9	0.9	0.9	0.9	404.686	261.097	182.906	261.097	960.793	817.204	739.013	817.204	1214.06	783.29
		Yantian	2	1112.21	1112.21	1112.21	1112.21	556.107	556.107	556.107	556.107	404.686	261.097	182.906	261.097	960.793	817.204	739.013	817.204	809.372	522.193	365.811	522.193	1921.59	1634.41	1478.03	1634.41	864.714	735.484	665.112	735.484	4474.26	4215.8	4075.06	4215.8	0.9	0.9	0.9	0.9	404.686	261.097	182.906	261.097	960.793	817.204	739.013	817.204	809.372	522.193
		Tanjung Pelepas	5	2780.54	2780.54	2780.54	2780.54	556.107	556.107	556.107	556.107	404.686	261.097	182.906	261.097	960.793	817.204	739.013	817.204	2023.43	1305.48	914.529	1305.48	4803.97	4086.02	3695.06	4086.02	864.714	735.484	665.112	735.484	7068.41	6422.25	6070.39	6422.25	0.9	0.9	0.9	0.9	404.686	261.097	182.906	261.097	960.793	817.204	739.013	817.204	2023.43	1305.48
		Colombo	5	2780.54	2780.54	2780.54	2780.54	556.107	556.107	556.107	556.107	404.686	261.097	182.906	261.097	960.793	817.204	739.013	817.204	2023.43	1305.48	914.529	1305.48	4803.97	4086.02	3695.06	4086.02	864.714	735.484	665.112	735.484	7068.41	6422.25	6070.39	6422.25	0.9	0.9	0.9	0.9	404.686	261.097	182.906	261.097	960.793	817.204	739.013	817.204	2023.43	1305.48
		Port Tangier Mediterranee	15	8341.61	8341.61	8341.61	8341.61	556.107	556.107	556.107	556.107	163.356	123.913	95.989	123.913	719.463	680.02	652.096	680.02	2450.34	1858.7	1439.84	1858.7	10791.9	10200.3	9781.44	10200.3	349.051	349.051	349.051	349.051	7980.6	7980.6	7980.6	7980.6	0.485155	0.513295	0.535275	0.513295	368.159	261.097	182.906	261.097	924.266	817.204	739.013	817.204	5522.39	3916.45
		Felixstowe	5	2780.54	2780.54	2780.54	2780.54	556.107	556.107	556.107	556.107	404.686	261.097	182.906	261.097	960.793	817.204	739.013	817.204	2023.43	1305.48	914.529	1305.48	4803.97	4086.02	3695.06	4086.02	864.714	735.484	665.112	735.484	7068.41	6422.25	6070.39	6422.25	0.9	0.9	0.9	0.9	404.686	261.097	182.906	261.097	960.793	817.204	739.013	817.204	2023.43	1305.48
		Hamburg	2	1112.21	1112.21	1112.21	1112.21	556.107	556.107	556.107	556.107	404.686	261.097	182.906	261.097	960.793	817.204	739.013	817.204	809.372	522.193	365.811	522.193	1921.59	1634.41	1478.03	1634.41	864.714	735.484	665.112	735.484	4474.26	4215.8	4075.06	4215.8	0.9	0.9	0.9	0.9	404.686	261.097	182.906	261.097	960.793	817.204	739.013	817.204	809.372	522.193
		Antwerp	4	2224.43	2224.43	2224.43	2224.43	556.107	556.107	556.107	556.107	404.686	261.097	182.906	261.097	960.793	817.204	739.013	817.204	1618.74	1044.39	731.623	1044.39	3843.17	3268.82	2956.05	3268.82	864.714	735.484	665.112	735.484	6203.69	5686.77	5405.28	5686.77	0.9	0.9	0.9	0.9	404.686	261.097	182.906	261.097	960.793	817.204	739.013	817.204	1618.74	1044.39
		London Gateway	2	1112.21	1112.21	1112.21	1112.21	556.107	556.107	556.107	556.107	404.686	261.097	182.906	261.097	960.793	817.204	739.013	817.204	809.372	522.193	365.811	522.193	1921.59	1634.41	1478.03	1634.41	864.714	735.484	665.112	735.484	4474.26	4215.8	4075.06	4215.8	0.9	0.9	0.9	0.9	404.686	261.097	182.906	261.097	960.793	817.204	739.013	817.204	809.372	522.193
		Le Havre	2	1112.21	1112.21	1112.21	1112.21	556.107	556.107	556.107	556.107	404.686	261.097	182.906	261.097	960.793	817.204	739.013	817.204	809.372	522.193	365.811	522.193	1921.59	1634.41	1478.03	1634.41	864.714	735.484	665.112	735.484	4474.26	4215.8	4075.06	4215.8	0.9	0.9	0.9	0.9	404.686	261.097	182.906	261.097	960.793	817.204	739.013	817.204	809.372	522.193
		Total/voyage	47	26137	26137	26137	26137													15400.3	10213.8	7292.82	10213.8	41537.3	36350.8	33429.9	36350.8					63099.8	58964.4	56712.5	58964.4	0.792218	0.791488	0.793283	0.791488									18472.3	12271.5
		TP17 Westbound	Transportation time between two ports (days)	MEA	PZ	NE-2	DES	MEA	PZ	NE-2	DES	MEA	PZ	NE-2	DES	MEA	PZ	NE-2	DES	MEA	PZ	NE-2	DES	MEA	PZ	NE-2	DES	MEA	PZ	NE-2	DES	MEA	PZ	NE-2	DES	MEA	PZ	NE-2	DES	MEA	PZ	NE-2	DES	MEA	PZ	NE-2	DES	MEA	PZ
		Newark	-	0	0	0	0	0	0	0	0	0	0	0	0	0	0	0	0	0	0	0	0	0	0	0	0	0	0	0	0	0	0	0	0	0	0	0	0	0	0	0	0	0	0	0	0	0	0
		Savannah	4	2778.11	2778.11	2778.11	2778.11	694.527	694.527	694.527	694.527	505.416	326.086	228.432	326.086	1199.94	1020.61	922.959	1020.61	2021.66	1304.34	913.73	1304.34	4799.77	4082.45	3691.84	4082.45	1079.95	918.551	830.663	918.551	7245.21	6599.62	6248.07	6599.62	0.9	0.9	0.9	0.9	505.416	326.086	228.432	326.086	1199.94	1020.61	922.959	1020.61	2021.66	1304.34
		Miami	3	2083.58	2083.58	2083.58	2083.58	694.527	694.527	694.527	694.527	505.416	326.086	228.432	326.086	1199.94	1020.61	922.959	1020.61	1516.25	978.257	685.297	978.257	3599.83	3061.84	2768.88	3061.84	1079.95	918.551	830.663	918.551	6165.26	5681.07	5417.4	5681.07	0.9	0.9	0.9	0.9	505.416	326.086	228.432	326.086	1199.94	1020.61	922.959	1020.61	1516.25	978.257
		Freeport	1	694.527	694.527	694.527	694.527	694.527	694.527	694.527	694.527	505.416	326.086	228.432	326.086	1199.94	1020.61	922.959	1020.61	505.416	326.086	228.432	326.086	1199.94	1020.61	922.959	1020.61	1079.95	918.551	830.663	918.551	4005.36	3843.96	3756.08	3843.96	0.9	0.9	0.9	0.9	505.416	326.086	228.432	326.086	1199.94	1020.61	922.959	1020.61	505.416	326.086
		Suez Canal	16	11112.4	11112.4	11112.4	11112.4	694.527	694.527	694.527	694.527	164.162	124.525	96.4629	124.525	858.689	819.052	790.99	819.052	2626.6	1992.4	1543.41	1992.4	13739	13104.8	12655.8	13104.8	350.774	350.774	350.774	350.774	8537.8	8537.8	8537.8	8537.8	0.4085	0.428269	0.443462	0.428269	369.823	280.528	217.311	280.528	1064.35	975.055	911.838	975.055	5917.17	4488.45
		Tanjung Pelepas	12	8334.32	8334.32	8334.32	8334.32	694.527	694.527	694.527	694.527	218.883	166.033	128.617	166.033	913.41	860.56	823.144	860.56	2626.6	1992.4	1543.41	1992.4	10960.9	10326.7	9877.73	10326.7	467.699	467.699	467.699	467.699	8537.8	8537.8	8537.8	8537.8	0.512036	0.543482	0.568186	0.543482	493.098	326.086	228.432	326.086	1187.62	1020.61	922.959	1020.61	5917.17	3913.03
		Hong Kong	5	3472.63	3472.63	3472.63	3472.63	694.527	694.527	694.527	694.527	505.416	326.086	228.432	326.086	1199.94	1020.61	922.959	1020.61	2527.08	1630.43	1142.16	1630.43	5999.71	5103.06	4614.8	5103.06	1079.95	918.551	830.663	918.551	8325.15	7518.17	7078.73	7518.17	0.9	0.9	0.9	0.9	505.416	326.086	228.432	326.086	1199.94	1020.61	922.959	1020.61	2527.08	1630.43
		Nansha New Port	1	694.527	694.527	694.527	694.527	694.527	694.527	694.527	694.527	505.416	326.086	228.432	326.086	1199.94	1020.61	922.959	1020.61	505.416	326.086	228.432	326.086	1199.94	1020.61	922.959	1020.61	1079.95	918.551	830.663	918.551	4005.36	3843.96	3756.08	3843.96	0.9	0.9	0.9	0.9	505.416	326.086	228.432	326.086	1199.94	1020.61	922.959	1020.61	505.416	326.086
		Yantian	2	1389.05	1389.05	1389.05	1389.05	694.527	694.527	694.527	694.527	505.416	326.086	228.432	326.086	1199.94	1020.61	922.959	1020.61	1010.83	652.172	456.865	652.172	2399.89	2041.23	1845.92	2041.23	1079.95	918.551	830.663	918.551	5085.31	4762.51	4586.74	4762.51	0.9	0.9	0.9	0.9	505.416	326.086	228.432	326.086	1199.94	1020.61	922.959	1020.61	1010.83	652.172
		Vung Tau	3	2083.58	2083.58	2083.58	2083.58	694.527	694.527	694.527	694.527	505.416	326.086	228.432	326.086	1199.94	1020.61	922.959	1020.61	1516.25	978.257	685.297	978.257	3599.83	3061.84	2768.88	3061.84	1079.95	918.551	830.663	918.551	6165.26	5681.07	5417.4	5681.07	0.9	0.9	0.9	0.9	505.416	326.086	228.432	326.086	1199.94	1020.61	922.959	1020.61	1516.25	978.257
		Singapore	3	2083.58	2083.58	2083.58	2083.58	694.527	694.527	694.527	694.527	505.416	326.086	228.432	326.086	1199.94	1020.61	922.959	1020.61	1516.25	978.257	685.297	978.257	3599.83	3061.84	2768.88	3061.84	1079.95	918.551	830.663	918.551	6165.26	5681.07	5417.4	5681.07	0.9	0.9	0.9	0.9	505.416	326.086	228.432	326.086	1199.94	1020.61	922.959	1020.61	1516.25	978.257
		Total/voyage	50	34726.3	34726.3	34726.3	34726.3													16372.3	11158.7	8112.33	11158.7	51098.7	45885	42838.7	45885					64237.8	60687	58753.5	60687	0.684629	0.685036	0.688615	0.685036									22953.5	15575.4
		TP2 Eastbound	Transportation days per segment (days)	MEA	PZ	NE-2	DES	MEA	PZ	NE-2	DES	MEA	PZ	NE-2	DES	MEA	PZ	NE-2	DES	MEA	PZ	NE-2	DES	MEA	PZ	NE-2	DES	MEA	PZ	NE-2	DES	MEA	PZ	NE-2	DES	MEA	PZ	NE-2	DES	MEA	PZ	NE-2	DES	MEA	PZ	NE-2	DES	MEA	PZ
		Nansha New Port	-	0	0	0	0	0	0	0	0	0	0	0	0	0	0	0	0	0	0	0	0	0	0	0	0	0	0	0	0	0	0	0	0	0	0	0	0	0	0	0	0	0	0	0	0	0	0
		Yantian	1	730.953	730.953	730.953	730.953	730.953	730.953	730.953	730.953	531.924	343.188	240.413	343.188	1262.88	1074.14	971.366	1074.14	531.924	343.188	240.413	343.188	1262.88	1074.14	971.366	1074.14	1136.59	966.727	874.23	966.727	4102.73	3932.87	3840.37	3932.87	0.9	0.9	0.9	0.9	531.924	343.188	240.413	343.188	1262.88	1074.14	971.366	1074.14	531.924	343.188
		Ningbo	3	2192.86	2192.86	2192.86	2192.86	730.953	730.953	730.953	730.953	531.924	343.188	240.413	343.188	1262.88	1074.14	971.366	1074.14	1595.77	1029.56	721.24	1029.56	3788.63	3222.42	2914.1	3222.42	1136.59	966.727	874.23	966.727	6375.91	5866.32	5588.83	5866.32	0.9	0.9	0.9	0.9	531.924	343.188	240.413	343.188	1262.88	1074.14	971.366	1074.14	1595.77	1029.56
		Shanghai	3	2192.86	2192.86	2192.86	2192.86	730.953	730.953	730.953	730.953	531.924	343.188	240.413	343.188	1262.88	1074.14	971.366	1074.14	1595.77	1029.56	721.24	1029.56	3788.63	3222.42	2914.1	3222.42	1136.59	966.727	874.23	966.727	6375.91	5866.32	5588.83	5866.32	0.9	0.9	0.9	0.9	531.924	343.188	240.413	343.188	1262.88	1074.14	971.366	1074.14	1595.77	1029.56
		Long Beach	15	10964.3	10964.3	10964.3	10964.3	730.953	730.953	730.953	730.953	188.359	142.879	110.681	142.879	919.313	873.833	841.634	873.833	2825.39	2143.19	1660.22	2143.19	13789.7	13107.5	12624.5	13107.5	402.477	402.477	402.477	402.477	9003.3	9003.3	9003.3	9003.3	0.437802	0.460589	0.478209	0.460589	421.878	320.014	240.413	320.014	1152.83	1050.97	971.366	1050.97	6328.17	4800.21
		Total/voyage	22	16081	16081	16081	16081													6548.86	4545.51	3343.11	4545.51	22629.8	20626.5	19424.1	20626.5					25857.8	24668.8	24021.3	24668.8	0.618356	0.620768	0.625861	0.620768									10051.6	7202.53
		TP2 Westbound	Transportation days per segment (days)	MEA	PZ	NE-2	DES	MEA	PZ	NE-2	DES	MEA	PZ	NE-2	DES	MEA	PZ	NE-2	DES	MEA	PZ	NE-2	DES	MEA	PZ	NE-2	DES	MEA	PZ	NE-2	DES	MEA	PZ	NE-2	DES	MEA	PZ	NE-2	DES	MEA	PZ	NE-2	DES	MEA	PZ	NE-2	DES	MEA	PZ
		Long Beach	-	0	0	0	0	0	0	0	0	0	0	0	0	0	0	0	0	0	0	0	0	0	0	0	0	0	0	0	0	0	0	0	0	0	0	0	0	0	0	0	0	0	0	0	0	0	0
		Busan	20	14619.1	14619.1	14619.1	14619.1	730.953	730.953	730.953	730.953	141.27	107.16	83.0109	107.16	872.223	838.113	813.964	838.113	2825.39	2143.19	1660.22	2143.19	17444.5	16762.3	16279.3	16762.3	301.858	301.858	301.858	301.858	9003.3	9003.3	9003.3	9003.3	0.346079	0.360164	0.370849	0.360164	316.408	240.011	185.924	240.011	1047.36	970.964	916.877	970.964	6328.17	4800.21
		Nansha New Port	13	9502.39	9502.39	9502.39	9502.39	730.953	730.953	730.953	730.953	217.338	164.861	127.709	164.861	948.291	895.814	858.662	895.814	2825.39	2143.19	1660.22	2143.19	12327.8	11645.6	11162.6	11645.6	464.397	464.397	464.397	464.397	9003.3	9003.3	9003.3	9003.3	0.48972	0.518408	0.540838	0.518408	486.782	343.188	240.413	343.188	1217.74	1074.14	971.366	1074.14	6328.17	4461.45
		Yantian	2	1461.91	1461.91	1461.91	1461.91	730.953	730.953	730.953	730.953	531.924	343.188	240.413	343.188	1262.88	1074.14	971.366	1074.14	1063.85	686.376	480.826	686.376	2525.75	2148.28	1942.73	2148.28	1136.59	966.727	874.23	966.727	5239.32	4899.59	4714.6	4899.59	0.9	0.9	0.9	0.9	531.924	343.188	240.413	343.188	1262.88	1074.14	971.366	1074.14	1063.85	686.376
		Ningbo	4	2923.81	2923.81	2923.81	2923.81	730.953	730.953	730.953	730.953	531.924	343.188	240.413	343.188	1262.88	1074.14	971.366	1074.14	2127.7	1372.75	961.653	1372.75	5051.51	4296.57	3885.47	4296.57	1136.59	966.727	874.23	966.727	7512.5	6833.05	6463.06	6833.05	0.9	0.9	0.9	0.9	531.924	343.188	240.413	343.188	1262.88	1074.14	971.366	1074.14	2127.7	1372.75
		Shanghai	3	2192.86	2192.86	2192.86	2192.86	730.953	730.953	730.953	730.953	531.924	343.188	240.413	343.188	1262.88	1074.14	971.366	1074.14	1595.77	1029.56	721.24	1029.56	3788.63	3222.42	2914.1	3222.42	1136.59	966.727	874.23	966.727	6375.91	5866.32	5588.83	5866.32	0.9	0.9	0.9	0.9	531.924	343.188	240.413	343.188	1262.88	1074.14	971.366	1074.14	1595.77	1029.56
		Total/voyage	42	30700	30700	30700	30700													10438.1	7375.08	5484.16	7375.08	41138.1	38075.1	36184.2	38075.1					37134.3	35605.6	34773.1	35605.6	0.542164	0.545628	0.551135	0.545628									17443.7	12350.4
		IA7	Transportation days per segment (days)	MEA	PZ	NE-2	DES	MEA	PZ	NE-2	DES	MEA	PZ	NE-2	DES	MEA	PZ	NE-2	DES	MEA	PZ	NE-2	DES	MEA	PZ	NE-2	DES	MEA	PZ	NE-2	DES	MEA	PZ	NE-2	DES	MEA	PZ	NE-2	DES	MEA	PZ	NE-2	DES	MEA	PZ	NE-2	DES	MEA	PZ
		Shantou	-	0	0	0	0	0	0	0	0	0	0	0	0	0	0	0	0	0	0	0	0	0	0	0	0	0	0	0	0	0	0	0	0	0	0	0	0	0	0	0	0	0	0	0	0	0	0
		Nansha New Port	2	325.408	325.408	325.408	325.408	162.704	162.704	162.704	162.704	99.1712	75.226	53.5139	75.226	261.875	237.93	216.218	237.93	198.342	150.452	107.028	150.452	523.75	475.86	432.436	475.86	211.904	211.904	194.596	211.904	1245.2	1245.2	1210.58	1245.2	0.809181	0.890617	0.9	0.890617	118.402	76.3907	53.5139	76.3907	281.106	239.095	216.218	239.095	236.803	152.781
		Yantian	1	162.704	162.704	162.704	162.704	162.704	162.704	162.704	162.704	118.402	76.3907	53.5139	76.3907	281.106	239.095	216.218	239.095	118.402	76.3907	53.5139	76.3907	281.106	239.095	216.218	239.095	252.995	215.185	194.596	215.185	1074.39	1036.58	1015.99	1036.58	0.9	0.9	0.9	0.9	118.402	76.3907	53.5139	76.3907	281.106	239.095	216.218	239.095	118.402	76.3907
		Hong Kong	1	162.704	162.704	162.704	162.704	162.704	162.704	162.704	162.704	118.402	76.3907	53.5139	76.3907	281.106	239.095	216.218	239.095	118.402	76.3907	53.5139	76.3907	281.106	239.095	216.218	239.095	252.995	215.185	194.596	215.185	1074.39	1036.58	1015.99	1036.58	0.9	0.9	0.9	0.9	118.402	76.3907	53.5139	76.3907	281.106	239.095	216.218	239.095	118.402	76.3907
		Tanjung Pelepas	4	650.815	650.815	650.815	650.815	162.704	162.704	162.704	162.704	49.5856	37.613	29.1368	37.613	212.289	200.317	191.841	200.317	198.342	150.452	116.547	150.452	849.158	801.268	767.363	801.268	105.952	105.952	105.952	105.952	1245.2	1245.2	1245.2	1245.2	0.499093	0.528923	0.552292	0.528923	118.402	76.3907	53.5139	76.3907	281.106	239.095	216.218	239.095	473.607	305.563
		Port Klang	0	0	0	0	0	0	0	0	0	0	0	0	0	0	0	0	0	0	0	0	0	0	0	0	0	0	0	0	0	821.391	821.391	821.391	821.391	0.9	0.9	0.9	0.9	0	0	0	0	0	0	0	0	0	0
		Chittagong	8	1301.63	1301.63	1301.63	1301.63	162.704	162.704	162.704	162.704	24.7928	18.8065	14.5684	18.8065	187.497	181.51	177.272	181.51	198.342	150.452	116.547	150.452	1499.97	1452.08	1418.18	1452.08	52.9761	52.9761	52.9761	52.9761	1245.2	1245.2	1245.2	1245.2	0.282544	0.291863	0.29884	0.291863	66.6724	50.5741	39.1771	50.5741	229.376	213.278	201.881	213.278	533.379	404.593
		Yangon	3	488.112	488.112	488.112	488.112	162.704	162.704	162.704	162.704	66.1141	50.1507	38.8491	50.1507	228.818	212.855	201.553	212.855	198.342	150.452	116.547	150.452	686.454	638.564	604.659	638.564	141.27	141.27	141.27	141.27	1245.2	1245.2	1245.2	1245.2	0.617388	0.66369	0.700905	0.66369	118.402	76.3907	53.5139	76.3907	281.106	239.095	216.218	239.095	355.205	229.172
		Port Klang	5	813.519	813.519	813.519	813.519	162.704	162.704	162.704	162.704	39.6685	30.0904	23.3095	30.0904	202.372	192.794	186.013	192.794	198.342	150.452	116.547	150.452	1011.86	963.971	930.067	963.971	84.7617	84.7617	84.7617	84.7617	1245.2	1245.2	1245.2	1245.2	0.41884	0.439649	0.455676	0.439649	106.676	76.3907	53.5139	76.3907	269.38	239.095	216.218	239.095	533.379	381.954
		Tanjung Pelepas	2	325.408	325.408	325.408	325.408	162.704	162.704	162.704	162.704	99.1712	75.226	53.5139	75.226	261.875	237.93	216.218	237.93	198.342	150.452	107.028	150.452	523.75	475.86	432.436	475.86	211.904	211.904	194.596	211.904	1245.2	1245.2	1210.58	1245.2	0.809181	0.890617	0.9	0.890617	118.402	76.3907	53.5139	76.3907	281.106	239.095	216.218	239.095	236.803	152.781
		Kuching	3	488.112	488.112	488.112	488.112	162.704	162.704	162.704	162.704	66.1141	50.1507	38.8491	50.1507	228.818	212.855	201.553	212.855	198.342	150.452	116.547	150.452	686.454	638.564	604.659	638.564	141.27	141.27	141.27	141.27	1245.2	1245.2	1245.2	1245.2	0.617388	0.66369	0.700905	0.66369	118.402	76.3907	53.5139	76.3907	281.106	239.095	216.218	239.095	355.205	229.172
		Shantou	6	976.223	976.223	976.223	976.223	162.704	162.704	162.704	162.704	33.0571	25.0753	19.4246	25.0753	195.761	187.779	182.128	187.779	198.342	150.452	116.547	150.452	1174.57	1126.68	1092.77	1126.68	70.6348	70.6348	70.6348	70.6348	1245.2	1245.2	1245.2	1245.2	0.360822	0.376159	0.387829	0.376159	88.8965	67.4322	52.2362	67.4322	251.6	230.136	214.94	230.136	533.379	404.593
		Total/voyage	35	5694.64	5694.64	5694.64	5694.64													1823.54	1356.4	1020.37	1356.4	7518.18	7051.03	6715	7051.03					12931.8	12856.1	12745.7	12856.1	0.518272	0.541884	0.552558	0.541884									3494.56	2413.39
		IA8	Transportation time between two ports (days)	MEA	PZ	NE-2	DES	MEA	PZ	NE-2	DES	MEA	PZ	NE-2	DES	MEA	PZ	NE-2	DES	MEA	PZ	NE-2	DES	MEA	PZ	NE-2	DES	MEA	PZ	NE-2	DES	MEA	PZ	NE-2	DES	MEA	PZ	NE-2	DES	MEA	PZ	NE-2	DES	MEA	PZ	NE-2	DES	MEA	PZ
		Inchon	-	0	0	0	0	0	0	0	0	0	0	0	0	0	0	0	0	0	0	0	0	0	0	0	0	0	0	0	0	0	0	0	0	0	0	0	0	0	0	0	0	0	0	0	0	0	0
		Dalian	2	1155.52	1155.52	1155.52	1155.52	577.761	577.761	577.761	577.761	420.444	271.263	190.028	271.263	998.204	849.024	767.788	849.024	840.887	542.526	380.055	542.526	1996.41	1698.05	1535.58	1698.05	898.384	764.121	691.009	764.121	3551.78	3283.25	3137.03	3283.25	0.9	0.9	0.9	0.9	420.444	271.263	190.028	271.263	998.204	849.024	767.788	849.024	840.887	542.526
		Xingang	2	1155.52	1155.52	1155.52	1155.52	577.761	577.761	577.761	577.761	420.444	271.263	190.028	271.263	998.204	849.024	767.788	849.024	840.887	542.526	380.055	542.526	1996.41	1698.05	1535.58	1698.05	898.384	764.121	691.009	764.121	3551.78	3283.25	3137.03	3283.25	0.9	0.9	0.9	0.9	420.444	271.263	190.028	271.263	998.204	849.024	767.788	849.024	840.887	542.526
		Qingdao	4	2311.04	2311.04	2311.04	2311.04	577.761	577.761	577.761	577.761	233.987	177.49	137.493	177.49	811.748	755.251	715.253	755.251	935.949	709.961	549.97	709.961	3246.99	3021	2861.01	3021	499.973	499.973	499.973	499.973	3754.9	3754.9	3754.9	3754.9	0.615921	0.661996	0.699015	0.661996	420.444	271.263	190.028	271.263	998.204	849.024	767.788	849.024	1681.77	1085.05
		Lianyungang	1	577.761	577.761	577.761	577.761	577.761	577.761	577.761	577.761	420.444	271.263	190.028	271.263	998.204	849.024	767.788	849.024	420.444	271.263	190.028	271.263	998.204	849.024	767.788	849.024	898.384	764.121	691.009	764.121	2653.39	2519.13	2446.02	2519.13	0.9	0.9	0.9	0.9	420.444	271.263	190.028	271.263	998.204	849.024	767.788	849.024	420.444	271.263
		Tanjung Pelepas	9	5199.85	5199.85	5199.85	5199.85	577.761	577.761	577.761	577.761	103.994	78.8846	61.1078	78.8846	681.755	656.645	638.868	656.645	935.949	709.961	549.97	709.961	6135.79	5909.81	5749.82	5909.81	222.21	222.21	222.21	222.21	3754.9	3754.9	3754.9	3754.9	0.325938	0.338402	0.347818	0.338402	248.574	188.555	146.064	188.555	826.335	766.316	723.825	766.316	2237.17	1697
		Singapore	1	577.761	577.761	577.761	577.761	577.761	577.761	577.761	577.761	420.444	271.263	190.028	271.263	998.204	849.024	767.788	849.024	420.444	271.263	190.028	271.263	998.204	849.024	767.788	849.024	898.384	764.121	691.009	764.121	2653.39	2519.13	2446.02	2519.13	0.9	0.9	0.9	0.9	420.444	271.263	190.028	271.263	998.204	849.024	767.788	849.024	420.444	271.263
		Jakarta	2	1155.52	1155.52	1155.52	1155.52	577.761	577.761	577.761	577.761	420.444	271.263	190.028	271.263	998.204	849.024	767.788	849.024	840.887	542.526	380.055	542.526	1996.41	1698.05	1535.58	1698.05	898.384	764.121	691.009	764.121	3551.78	3283.25	3137.03	3283.25	0.9	0.9	0.9	0.9	420.444	271.263	190.028	271.263	998.204	849.024	767.788	849.024	840.887	542.526
		Surabaya	3	1733.28	1733.28	1733.28	1733.28	577.761	577.761	577.761	577.761	311.983	236.654	183.323	236.654	889.744	814.414	761.084	814.414	935.949	709.961	549.97	709.961	2669.23	2443.24	2283.25	2443.24	666.63	666.63	666.63	666.63	3754.9	3754.9	3754.9	3754.9	0.749239	0.818539	0.875896	0.818539	420.444	271.263	190.028	271.263	998.204	849.024	767.788	849.024	1261.33	813.789
		Jakarta	3	1733.28	1733.28	1733.28	1733.28	577.761	577.761	577.761	577.761	311.983	236.654	183.323	236.654	889.744	814.414	761.084	814.414	935.949	709.961	549.97	709.961	2669.23	2443.24	2283.25	2443.24	666.63	666.63	666.63	666.63	3754.9	3754.9	3754.9	3754.9	0.749239	0.818539	0.875896	0.818539	420.444	271.263	190.028	271.263	998.204	849.024	767.788	849.024	1261.33	813.789
		Tanjung Pelepas	3	1733.28	1733.28	1733.28	1733.28	577.761	577.761	577.761	577.761	311.983	236.654	183.323	236.654	889.744	814.414	761.084	814.414	935.949	709.961	549.97	709.961	2669.23	2443.24	2283.25	2443.24	666.63	666.63	666.63	666.63	3754.9	3754.9	3754.9	3754.9	0.749239	0.818539	0.875896	0.818539	420.444	271.263	190.028	271.263	998.204	849.024	767.788	849.024	1261.33	813.789
		Singapore	1	577.761	577.761	577.761	577.761	577.761	577.761	577.761	577.761	420.444	271.263	190.028	271.263	998.204	849.024	767.788	849.024	420.444	271.263	190.028	271.263	998.204	849.024	767.788	849.024	898.384	764.121	691.009	764.121	2653.39	2519.13	2446.02	2519.13	0.9	0.9	0.9	0.9	420.444	271.263	190.028	271.263	998.204	849.024	767.788	849.024	420.444	271.263
		Shekou	5	2888.8	2888.8	2888.8	2888.8	577.761	577.761	577.761	577.761	187.19	141.992	109.994	141.992	764.95	719.753	687.755	719.753	935.949	709.961	549.97	709.961	3824.75	3598.76	3438.77	3598.76	399.978	399.978	399.978	399.978	3754.9	3754.9	3754.9	3754.9	0.522881	0.555716	0.581571	0.555716	420.444	271.263	190.028	271.263	998.204	849.024	767.788	849.024	2102.22	1356.32
		Nansha New Port	1	577.761	577.761	577.761	577.761	577.761	577.761	577.761	577.761	420.444	271.263	190.028	271.263	998.204	849.024	767.788	849.024	420.444	271.263	190.028	271.263	998.204	849.024	767.788	849.024	898.384	764.121	691.009	764.121	2653.39	2519.13	2446.02	2519.13	0.9	0.9	0.9	0.9	420.444	271.263	190.028	271.263	998.204	849.024	767.788	849.024	420.444	271.263
		Hong Kong	0	0	0	0	0	0	0	0	0	0	0	0	0	0	0	0	0	0	0	0	0	0	0	0	0	0	0	0	0	1755.01	1755.01	1755.01	1755.01	0.9	0.9	0.9	0.9	0	0	0	0	0	0	0	0	0	0
		Inchon	5	2888.8	2888.8	2888.8	2888.8	577.761	577.761	577.761	577.761	187.19	141.992	109.994	141.992	764.95	719.753	687.755	719.753	935.949	709.961	549.97	709.961	3824.75	3598.76	3438.77	3598.76	399.978	399.978	399.978	399.978	3754.9	3754.9	3754.9	3754.9	0.522881	0.555716	0.581571	0.555716	420.444	271.263	190.028	271.263	998.204	849.024	767.788	849.024	2102.22	1356.32
		Total/voyage	42	24265.9	24265.9	24265.9	24265.9													10756.1	7682.36	5750.07	7682.36	35022	31948.3	30016	31948.3					49308.2	47965.6	47234.5	47965.6	0.656246	0.677358	0.696606	0.677358									16111.8	10648.7
		ME Eastbound	Transportation days per segment (days)	MEA	PZ	NE-2	DES	MEA	PZ	NE-2	DES	MEA	PZ	NE-2	DES	MEA	PZ	NE-2	DES	MEA	PZ	NE-2	DES	MEA	PZ	NE-2	DES	MEA	PZ	NE-2	DES	MEA	PZ	NE-2	DES	MEA	PZ	NE-2	DES	MEA	PZ	NE-2	DES	MEA	PZ	NE-2	DES	MEA	PZ
		Mombasa	-	0	0	0	0	0	0	0	0	0	0	0	0	0	0	0	0	0	0	0	0	0	0	0	0	0	0	0	0	0	0	0	0	0	0	0	0	0	0	0	0	0	0	0	0	0	0
		Tanjung Pelepas	12	4439.14	4439.14	4439.14	4439.14	369.929	369.929	369.929	369.929	41.5783	31.5391	24.4317	31.5391	411.507	401.468	394.36	401.468	498.94	378.469	293.181	378.469	4938.08	4817.61	4732.32	4817.61	88.8426	88.8426	88.8426	88.8426	2400.1	2400.1	2400.1	2400.1	0.215896	0.221294	0.225283	0.221294	104.48	79.253	61.3932	79.253	474.409	449.182	431.322	449.182	1253.76	951.036
		Singapore	1	369.929	369.929	369.929	369.929	369.929	369.929	369.929	369.929	269.202	173.684	121.671	173.684	639.13	543.613	491.6	543.613	269.202	173.684	121.671	173.684	639.13	543.613	491.6	543.613	575.217	489.252	442.44	489.252	1909.21	1823.24	1776.43	1823.24	0.9	0.9	0.9	0.9	269.202	173.684	121.671	173.684	639.13	543.613	491.6	543.613	269.202	173.684
		Shanghai	10	3699.29	3699.29	3699.29	3699.29	369.929	369.929	369.929	369.929	49.894	37.8469	29.3181	37.8469	419.823	407.776	399.247	407.776	498.94	378.469	293.181	378.469	4198.23	4077.76	3992.47	4077.76	106.611	106.611	106.611	106.611	2400.1	2400.1	2400.1	2400.1	0.253943	0.261445	0.267031	0.261445	125.376	95.1036	73.6718	95.1036	495.305	465.032	443.601	465.032	1253.76	951.036
		Ningbo	1	369.929	369.929	369.929	369.929	369.929	369.929	369.929	369.929	269.202	173.684	121.671	173.684	639.13	543.613	491.6	543.613	269.202	173.684	121.671	173.684	639.13	543.613	491.6	543.613	575.217	489.252	442.44	489.252	1909.21	1823.24	1776.43	1823.24	0.9	0.9	0.9	0.9	269.202	173.684	121.671	173.684	639.13	543.613	491.6	543.613	269.202	173.684
		Nansha New Port	5	1849.64	1849.64	1849.64	1849.64	369.929	369.929	369.929	369.929	99.788	75.6939	58.6361	75.6939	469.717	445.623	428.565	445.623	498.94	378.469	293.181	378.469	2348.58	2228.11	2142.82	2228.11	213.222	213.222	213.222	213.222	2400.1	2400.1	2400.1	2400.1	0.453938	0.478482	0.497526	0.478482	250.752	173.684	121.671	173.684	620.681	543.613	491.6	543.613	1253.76	868.422
		Total/voyage	29	10727.9	10727.9	10727.9	10727.9													2035.22	1482.78	1122.88	1482.78	12763.2	12210.7	11850.8	12210.7					11018.7	10846.8	10753.2	10846.8	0.340728	0.342063	0.344551	0.342063									4299.69	3117.86
		ME Westbound	Transportation days per segment (days)	MEA	PZ	NE-2	DES	MEA	PZ	NE-2	DES	MEA	PZ	NE-2	DES	MEA	PZ	NE-2	DES	MEA	PZ	NE-2	DES	MEA	PZ	NE-2	DES	MEA	PZ	NE-2	DES	MEA	PZ	NE-2	DES	MEA	PZ	NE-2	DES	MEA	PZ	NE-2	DES	MEA	PZ	NE-2	DES	MEA	PZ
		Shanghai	-	0	0	0	0	0	0	0	0	0	0	0	0	0	0	0	0	0	0	0	0	0	0	0	0	0	0	0	0	0	0	0	0	0	0	0	0	0	0	0	0	0	0	0	0	0	0
		Ningbo	1	369.929	369.929	369.929	369.929	369.929	369.929	369.929	369.929	269.202	173.684	121.671	173.684	639.13	543.613	491.6	543.613	269.202	173.684	121.671	173.684	639.13	543.613	491.6	543.613	575.217	489.252	442.44	489.252	1909.21	1823.24	1776.43	1823.24	0.9	0.9	0.9	0.9	269.202	173.684	121.671	173.684	639.13	543.613	491.6	543.613	269.202	173.684
		Nansha New Port	4	1479.71	1479.71	1479.71	1479.71	369.929	369.929	369.929	369.929	124.735	94.6174	73.2951	94.6174	494.664	464.546	443.224	464.546	498.94	378.469	293.181	378.469	1978.65	1858.18	1772.9	1858.18	266.528	266.528	266.528	266.528	2400.1	2400.1	2400.1	2400.1	0.538806	0.573738	0.601339	0.573738	269.202	173.684	121.671	173.684	639.13	543.613	491.6	543.613	1076.81	694.738
		Singapore	5	1849.64	1849.64	1849.64	1849.64	369.929	369.929	369.929	369.929	99.788	75.6939	58.6361	75.6939	469.717	445.623	428.565	445.623	498.94	378.469	293.181	378.469	2348.58	2228.11	2142.82	2228.11	213.222	213.222	213.222	213.222	2400.1	2400.1	2400.1	2400.1	0.453938	0.478482	0.497526	0.478482	250.752	173.684	121.671	173.684	620.681	543.613	491.6	543.613	1253.76	868.422
		Tanjung Pelepas	1	369.929	369.929	369.929	369.929	369.929	369.929	369.929	369.929	269.202	173.684	121.671	173.684	639.13	543.613	491.6	543.613	269.202	173.684	121.671	173.684	639.13	543.613	491.6	543.613	575.217	489.252	442.44	489.252	1909.21	1823.24	1776.43	1823.24	0.9	0.9	0.9	0.9	269.202	173.684	121.671	173.684	639.13	543.613	491.6	543.613	269.202	173.684
		Mombasa	11	4069.22	4069.22	4069.22	4069.22	369.929	369.929	369.929	369.929	45.3582	34.4063	26.6528	34.4063	415.287	404.335	396.581	404.335	498.94	378.469	293.181	378.469	4568.16	4447.69	4362.4	4447.69	96.9192	96.9192	96.9192	96.9192	2400.1	2400.1	2400.1	2400.1	0.233379	0.2397	0.244387	0.2397	113.978	86.4578	66.9744	86.4578	483.907	456.387	436.903	456.387	1253.76	951.036
		Total/voyage	22	8138.43	8138.43	8138.43	8138.43													2035.22	1482.78	1122.88	1482.78	10173.7	9621.21	9261.31	9621.21					11018.7	10846.8	10753.2	10846.8	0.427454	0.434128	0.440889	0.434128									4122.73	2861.56
		IA1	Transportation days per segment (days)	MEA	PZ	NE-2	DES	MEA	PZ	NE-2	DES	MEA	PZ	NE-2	DES	MEA	PZ	NE-2	DES	MEA	PZ	NE-2	DES	MEA	PZ	NE-2	DES	MEA	PZ	NE-2	DES	MEA	PZ	NE-2	DES	MEA	PZ	NE-2	DES	MEA	PZ	NE-2	DES	MEA	PZ	NE-2	DES	MEA	PZ
		Qingdao	-	0	0	0	0	0	0	0	0	0	0	0	0	0	0	0	0	0	0	0	0	0	0	0	0	0	0	0	0	0	0	0	0	0	0	0	0	0	0	0	0	0	0	0	0	0	0
		Shanghai	3	1109.79	1109.79	1109.79	1109.79	369.929	369.929	369.929	369.929	179.598	136.234	105.533	136.234	549.527	506.162	475.462	506.162	538.795	408.701	316.6	408.701	1648.58	1518.49	1426.39	1518.49	383.757	383.757	383.757	383.757	2537.8	2537.8	2537.8	2537.8	0.698341	0.75817	0.807125	0.75817	269.202	173.684	121.671	173.684	639.13	543.613	491.6	543.613	807.605	521.053
		Ningbo	2	739.857	739.857	739.857	739.857	369.929	369.929	369.929	369.929	269.202	173.684	121.671	173.684	639.13	543.613	491.6	543.613	538.403	347.369	243.342	347.369	1278.26	1087.23	983.199	1087.23	575.217	489.252	442.44	489.252	2536.96	2365.03	2271.41	2365.03	0.9	0.9	0.9	0.9	269.202	173.684	121.671	173.684	639.13	543.613	491.6	543.613	538.403	347.369
		Nansha New Port	4	1479.71	1479.71	1479.71	1479.71	369.929	369.929	369.929	369.929	134.699	102.175	79.1499	102.175	504.627	472.104	449.079	472.104	538.795	408.701	316.6	408.701	2018.51	1888.42	1796.31	1888.42	287.818	287.818	287.818	287.818	2537.8	2537.8	2537.8	2537.8	0.570357	0.609649	0.640907	0.609649	269.202	173.684	121.671	173.684	639.13	543.613	491.6	543.613	1076.81	694.738
		Tanjung Pelepas	5	1849.64	1849.64	1849.64	1849.64	369.929	369.929	369.929	369.929	107.759	81.7402	63.3199	81.7402	477.688	451.669	433.249	451.669	538.795	408.701	316.6	408.701	2388.44	2258.34	2166.24	2258.34	230.254	230.254	230.254	230.254	2537.8	2537.8	2537.8	2537.8	0.482018	0.509785	0.53146	0.509785	269.202	173.684	121.671	173.684	639.13	543.613	491.6	543.613	1346.01	868.422
		Jakarta	3	1109.79	1109.79	1109.79	1109.79	369.929	369.929	369.929	369.929	179.598	136.234	105.533	136.234	549.527	506.162	475.462	506.162	538.795	408.701	316.6	408.701	1648.58	1518.49	1426.39	1518.49	383.757	383.757	383.757	383.757	2537.8	2537.8	2537.8	2537.8	0.698341	0.75817	0.807125	0.75817	269.202	173.684	121.671	173.684	639.13	543.613	491.6	543.613	807.605	521.053
		Terminal Petikemas Semarang	3	1109.79	1109.79	1109.79	1109.79	369.929	369.929	369.929	369.929	179.598	136.234	105.533	136.234	549.527	506.162	475.462	506.162	538.795	408.701	316.6	408.701	1648.58	1518.49	1426.39	1518.49	383.757	383.757	383.757	383.757	2537.8	2537.8	2537.8	2537.8	0.698341	0.75817	0.807125	0.75817	269.202	173.684	121.671	173.684	639.13	543.613	491.6	543.613	807.605	521.053
		PT. IPC Panjang	3	1109.79	1109.79	1109.79	1109.79	369.929	369.929	369.929	369.929	179.598	136.234	105.533	136.234	549.527	506.162	475.462	506.162	538.795	408.701	316.6	408.701	1648.58	1518.49	1426.39	1518.49	383.757	383.757	383.757	383.757	2537.8	2537.8	2537.8	2537.8	0.698341	0.75817	0.807125	0.75817	269.202	173.684	121.671	173.684	639.13	543.613	491.6	543.613	807.605	521.053
		Jakarta	2	739.857	739.857	739.857	739.857	369.929	369.929	369.929	369.929	269.202	173.684	121.671	173.684	639.13	543.613	491.6	543.613	538.403	347.369	243.342	347.369	1278.26	1087.23	983.199	1087.23	575.217	489.252	442.44	489.252	2536.96	2365.03	2271.41	2365.03	0.9	0.9	0.9	0.9	269.202	173.684	121.671	173.684	639.13	543.613	491.6	543.613	538.403	347.369
		Tanjung Pelepas	2	739.857	739.857	739.857	739.857	369.929	369.929	369.929	369.929	269.202	173.684	121.671	173.684	639.13	543.613	491.6	543.613	538.403	347.369	243.342	347.369	1278.26	1087.23	983.199	1087.23	575.217	489.252	442.44	489.252	2536.96	2365.03	2271.41	2365.03	0.9	0.9	0.9	0.9	269.202	173.684	121.671	173.684	639.13	543.613	491.6	543.613	538.403	347.369
		Singapore	2	739.857	739.857	739.857	739.857	369.929	369.929	369.929	369.929	269.202	173.684	121.671	173.684	639.13	543.613	491.6	543.613	538.403	347.369	243.342	347.369	1278.26	1087.23	983.199	1087.23	575.217	489.252	442.44	489.252	2536.96	2365.03	2271.41	2365.03	0.9	0.9	0.9	0.9	269.202	173.684	121.671	173.684	639.13	543.613	491.6	543.613	538.403	347.369
		Batangas	4	1479.71	1479.71	1479.71	1479.71	369.929	369.929	369.929	369.929	134.699	102.175	79.1499	102.175	504.627	472.104	449.079	472.104	538.795	408.701	316.6	408.701	2018.51	1888.42	1796.31	1888.42	287.818	287.818	287.818	287.818	2537.8	2537.8	2537.8	2537.8	0.570357	0.609649	0.640907	0.609649	269.202	173.684	121.671	173.684	639.13	543.613	491.6	543.613	1076.81	694.738
		Manila	2	739.857	739.857	739.857	739.857	369.929	369.929	369.929	369.929	269.202	173.684	121.671	173.684	639.13	543.613	491.6	543.613	538.403	347.369	243.342	347.369	1278.26	1087.23	983.199	1087.23	575.217	489.252	442.44	489.252	2536.96	2365.03	2271.41	2365.03	0.9	0.9	0.9	0.9	269.202	173.684	121.671	173.684	639.13	543.613	491.6	543.613	538.403	347.369
		Subic	1	369.929	369.929	369.929	369.929	369.929	369.929	369.929	369.929	269.202	173.684	121.671	173.684	639.13	543.613	491.6	543.613	269.202	173.684	121.671	173.684	639.13	543.613	491.6	543.613	575.217	489.252	442.44	489.252	1961.75	1875.78	1828.97	1875.78	0.9	0.9	0.9	0.9	269.202	173.684	121.671	173.684	639.13	543.613	491.6	543.613	269.202	173.684
		Qingdao	6	2219.57	2219.57	2219.57	2219.57	369.929	369.929	369.929	369.929	89.7991	68.1169	52.7666	68.1169	459.728	438.046	422.695	438.046	538.795	408.701	316.6	408.701	2758.37	2628.27	2536.17	2628.27	191.879	191.879	191.879	191.879	2537.8	2537.8	2537.8	2537.8	0.417374	0.438033	0.45394	0.438033	224.389	170.209	121.671	170.209	594.317	540.138	491.6	540.138	1346.33	1021.26
		Total/voyage	42	15537	15537	15537	15537													7271.58	5180.14	3871.18	5180.14	22808.6	20717.1	19408.2	20717.1					34949	34003.3	33488.4	34003.3	0.681215	0.704341	0.725313	0.704341									11037.6	7273.89
		IA88	Transportation days per segment (days)	MEA	PZ	NE-2	DES	MEA	PZ	NE-2	DES	MEA	PZ	NE-2	DES	MEA	PZ	NE-2	DES	MEA	PZ	NE-2	DES	MEA	PZ	NE-2	DES	MEA	PZ	NE-2	DES	MEA	PZ	NE-2	DES	MEA	PZ	NE-2	DES	MEA	PZ	NE-2	DES	MEA	PZ	NE-2	DES	MEA	PZ
		Yokohama	-	0	0	0	0	0	0	0	0	0	0	0	0	0	0	0	0	0	0	0	0	0	0	0	0	0	0	0	0	0	0	0	0	0	0	0	0	0	0	0	0	0	0	0	0	0	0
		Nagoya	1	136.598	136.598	136.598	136.598	136.598	136.598	136.598	136.598	93.2354	64.134	44.9277	64.134	229.834	200.732	181.526	200.732	93.2354	64.134	44.9277	64.134	229.834	200.732	181.526	200.732	199.221	180.659	163.374	180.659	774.2	755.638	738.353	755.638	0.866804	0.9	0.9	0.9	99.4044	64.134	44.9277	64.134	236.003	200.732	181.526	200.732	99.4044	64.134
		Osaka	1	136.598	136.598	136.598	136.598	136.598	136.598	136.598	136.598	93.2354	64.134	44.9277	64.134	229.834	200.732	181.526	200.732	93.2354	64.134	44.9277	64.134	229.834	200.732	181.526	200.732	199.221	180.659	163.374	180.659	774.2	755.638	738.353	755.638	0.866804	0.9	0.9	0.9	99.4044	64.134	44.9277	64.134	236.003	200.732	181.526	200.732	99.4044	64.134
		Kobe	1	136.598	136.598	136.598	136.598	136.598	136.598	136.598	136.598	93.2354	64.134	44.9277	64.134	229.834	200.732	181.526	200.732	93.2354	64.134	44.9277	64.134	229.834	200.732	181.526	200.732	199.221	180.659	163.374	180.659	774.2	755.638	738.353	755.638	0.866804	0.9	0.9	0.9	99.4044	64.134	44.9277	64.134	236.003	200.732	181.526	200.732	99.4044	64.134
		Moji	1	136.598	136.598	136.598	136.598	136.598	136.598	136.598	136.598	93.2354	64.134	44.9277	64.134	229.834	200.732	181.526	200.732	93.2354	64.134	44.9277	64.134	229.834	200.732	181.526	200.732	199.221	180.659	163.374	180.659	774.2	755.638	738.353	755.638	0.866804	0.9	0.9	0.9	99.4044	64.134	44.9277	64.134	236.003	200.732	181.526	200.732	99.4044	64.134
		Hibiki Nada	1	136.598	136.598	136.598	136.598	136.598	136.598	136.598	136.598	93.2354	64.134	44.9277	64.134	229.834	200.732	181.526	200.732	93.2354	64.134	44.9277	64.134	229.834	200.732	181.526	200.732	199.221	180.659	163.374	180.659	774.2	755.638	738.353	755.638	0.866804	0.9	0.9	0.9	99.4044	64.134	44.9277	64.134	236.003	200.732	181.526	200.732	99.4044	64.134
		Busan	1	136.598	136.598	136.598	136.598	136.598	136.598	136.598	136.598	93.2354	64.134	44.9277	64.134	229.834	200.732	181.526	200.732	93.2354	64.134	44.9277	64.134	229.834	200.732	181.526	200.732	199.221	180.659	163.374	180.659	774.2	755.638	738.353	755.638	0.866804	0.9	0.9	0.9	99.4044	64.134	44.9277	64.134	236.003	200.732	181.526	200.732	99.4044	64.134
		Gwangyang	1	136.598	136.598	136.598	136.598	136.598	136.598	136.598	136.598	93.2354	64.134	44.9277	64.134	229.834	200.732	181.526	200.732	93.2354	64.134	44.9277	64.134	229.834	200.732	181.526	200.732	199.221	180.659	163.374	180.659	774.2	755.638	738.353	755.638	0.866804	0.9	0.9	0.9	99.4044	64.134	44.9277	64.134	236.003	200.732	181.526	200.732	99.4044	64.134
		Shanghai	3	409.795	409.795	409.795	409.795	136.598	136.598	136.598	136.598	31.0785	23.5745	18.2619	23.5745	167.677	160.173	154.86	160.173	93.2354	70.7234	54.7857	70.7234	503.031	480.519	464.581	480.519	66.407	66.407	66.407	66.407	774.2	774.2	774.2	774.2	0.396041	0.414596	0.428818	0.414596	89.2852	64.134	44.9277	64.134	225.884	200.732	181.526	200.732	267.856	192.402
		Ningbo	1	136.598	136.598	136.598	136.598	136.598	136.598	136.598	136.598	93.2354	64.134	44.9277	64.134	229.834	200.732	181.526	200.732	93.2354	64.134	44.9277	64.134	229.834	200.732	181.526	200.732	199.221	180.659	163.374	180.659	774.2	755.638	738.353	755.638	0.866804	0.9	0.9	0.9	99.4044	64.134	44.9277	64.134	236.003	200.732	181.526	200.732	99.4044	64.134
		Ho Chi Minh City (Saigon)	5	682.992	682.992	682.992	682.992	136.598	136.598	136.598	136.598	18.6471	14.1447	10.9571	14.1447	155.245	150.743	147.556	150.743	93.2354	70.7234	54.7857	70.7234	776.227	753.715	737.778	753.715	39.8442	39.8442	39.8442	39.8442	774.2	774.2	774.2	774.2	0.256653	0.264318	0.270028	0.264318	53.5711	40.6362	31.4788	40.6362	190.17	177.235	168.077	177.235	267.856	203.181
		Laem Chabang	4	546.394	546.394	546.394	546.394	136.598	136.598	136.598	136.598	23.3088	17.6809	13.6964	17.6809	159.907	154.279	150.295	154.279	93.2354	70.7234	54.7857	70.7234	639.629	617.117	601.179	617.117	49.8052	49.8052	49.8052	49.8052	774.2	774.2	774.2	774.2	0.311463	0.322825	0.331383	0.322825	66.9639	50.7953	39.3485	50.7953	203.562	187.394	175.947	187.394	267.856	203.181
		Bangkok	2	273.197	273.197	273.197	273.197	136.598	136.598	136.598	136.598	46.6177	35.3617	27.3929	35.3617	183.216	171.96	163.991	171.96	93.2354	70.7234	54.7857	70.7234	366.432	343.92	327.983	343.92	99.6104	99.6104	99.6104	99.6104	774.2	774.2	774.2	774.2	0.543677	0.579265	0.607413	0.579265	99.4044	64.134	44.9277	64.134	236.003	200.732	181.526	200.732	198.809	128.268
		Laem Chabang	1	136.598	136.598	136.598	136.598	136.598	136.598	136.598	136.598	93.2354	64.134	44.9277	64.134	229.834	200.732	181.526	200.732	93.2354	64.134	44.9277	64.134	229.834	200.732	181.526	200.732	199.221	180.659	163.374	180.659	774.2	755.638	738.353	755.638	0.866804	0.9	0.9	0.9	99.4044	64.134	44.9277	64.134	236.003	200.732	181.526	200.732	99.4044	64.134
		Haiphong	5	682.992	682.992	682.992	682.992	136.598	136.598	136.598	136.598	18.6471	14.1447	10.9571	14.1447	155.245	150.743	147.556	150.743	93.2354	70.7234	54.7857	70.7234	776.227	753.715	737.778	753.715	39.8442	39.8442	39.8442	39.8442	774.2	774.2	774.2	774.2	0.256653	0.264318	0.270028	0.264318	53.5711	40.6362	31.4788	40.6362	190.17	177.235	168.077	177.235	267.856	203.181
		Hong Kong	2	273.197	273.197	273.197	273.197	136.598	136.598	136.598	136.598	46.6177	35.3617	27.3929	35.3617	183.216	171.96	163.991	171.96	93.2354	70.7234	54.7857	70.7234	366.432	343.92	327.983	343.92	99.6104	99.6104	99.6104	99.6104	774.2	774.2	774.2	774.2	0.543677	0.579265	0.607413	0.579265	99.4044	64.134	44.9277	64.134	236.003	200.732	181.526	200.732	198.809	128.268
		Nansha New Port	0	0	0	0	0	0	0	0	0	0	0	0	0	0	0	0	0	0	0	0	0	0	0	0	0	0	0	0	0	574.979	574.979	574.979	574.979	0.9	0.9	0.9	0.9	0	0	0	0	0	0	0	0	0	0
		Yokohama	5	682.992	682.992	682.992	682.992	136.598	136.598	136.598	136.598	18.6471	14.1447	10.9571	14.1447	155.245	150.743	147.556	150.743	93.2354	70.7234	54.7857	70.7234	776.227	753.715	737.778	753.715	39.8442	39.8442	39.8442	39.8442	774.2	774.2	774.2	774.2	0.256653	0.264318	0.270028	0.264318	53.5711	40.6362	31.4788	40.6362	190.17	177.235	168.077	177.235	267.856	203.181
		Total/voyage	35	4780.94	4780.94	4780.94	4780.94													1491.77	1072.27	787.85	1072.27	6272.71	5853.21	5568.79	5853.21					12962.2	12795.1	12639.6	12795.1	0.508159	0.516038	0.514457	0.516038									2631.53	1838.87
		PH5	Transportation days per segment (days)	MEA	PZ	NE-2	DES	MEA	PZ	NE-2	DES	MEA	PZ	NE-2	DES	MEA	PZ	NE-2	DES	MEA	PZ	NE-2	DES	MEA	PZ	NE-2	DES	MEA	PZ	NE-2	DES	MEA	PZ	NE-2	DES	MEA	PZ	NE-2	DES	MEA	PZ	NE-2	DES	MEA	PZ	NE-2	DES	MEA	PZ
		Busan	-	0	0	0	0	0	0	0	0	0	0	0	0	0	0	0	0	0	0	0	0	0	0	0	0	0	0	0	0	0	0	0	0	0	0	0	0	0	0	0	0	0	0	0	0	0	0
		Dalian	5	1095.82	1095.82	1095.82	1095.82	219.165	219.165	219.165	219.165	40.3751	30.6264	23.7247	30.6264	259.54	249.791	242.889	249.791	201.876	153.132	118.623	153.132	1297.7	1248.95	1214.45	1248.95	86.2716	86.2716	86.2716	86.2716	1299.6	1299.6	1299.6	1299.6	0.332402	0.345375	0.355189	0.345375	109.371	82.9633	64.2673	82.9633	328.536	302.128	283.432	302.128	546.856	414.816
		Xingang	1	219.165	219.165	219.165	219.165	219.165	219.165	219.165	219.165	159.489	102.899	72.084	102.899	378.653	322.064	291.249	322.064	159.489	102.899	72.084	102.899	378.653	322.064	291.249	322.064	340.788	289.858	262.124	289.858	1209.03	1158.1	1130.37	1158.1	0.9	0.9	0.9	0.9	159.489	102.899	72.084	102.899	378.653	322.064	291.249	322.064	159.489	102.899
		Qingdao	3	657.494	657.494	657.494	657.494	219.165	219.165	219.165	219.165	67.2919	51.044	39.5412	51.044	286.456	270.209	258.706	270.209	201.876	153.132	118.623	153.132	859.369	810.626	776.117	810.626	143.786	143.786	143.786	143.786	1299.6	1299.6	1299.6	1299.6	0.501947	0.53213	0.55579	0.53213	159.489	102.899	72.084	102.899	378.653	322.064	291.249	322.064	478.466	308.698
		Hong Kong	4	876.658	876.658	876.658	876.658	219.165	219.165	219.165	219.165	50.4689	38.283	29.6559	38.283	269.633	257.448	248.82	257.448	201.876	153.132	118.623	153.132	1078.53	1029.79	995.282	1029.79	107.84	107.84	107.84	107.84	1299.6	1299.6	1299.6	1299.6	0.399949	0.418879	0.433403	0.418879	136.714	102.899	72.084	102.899	355.879	322.064	291.249	322.064	546.856	411.598
		Yantian	0	0	0	0	0	0	0	0	0	0	0	0	0	0	0	0	0	0	0	0	0	0	0	0	0	0	0	0	0	868.242	868.242	868.242	868.242	0.9	0.9	0.9	0.9	0	0	0	0	0	0	0	0	0	0
		Nansha New Port	1	219.165	219.165	219.165	219.165	219.165	219.165	219.165	219.165	159.489	102.899	72.084	102.899	378.653	322.064	291.249	322.064	159.489	102.899	72.084	102.899	378.653	322.064	291.249	322.064	340.788	289.858	262.124	289.858	1209.03	1158.1	1130.37	1158.1	0.9	0.9	0.9	0.9	159.489	102.899	72.084	102.899	378.653	322.064	291.249	322.064	159.489	102.899
		Ho Chi Minh City (Saigon)	4	876.658	876.658	876.658	876.658	219.165	219.165	219.165	219.165	50.4689	38.283	29.6559	38.283	269.633	257.448	248.82	257.448	201.876	153.132	118.623	153.132	1078.53	1029.79	995.282	1029.79	107.84	107.84	107.84	107.84	1299.6	1299.6	1299.6	1299.6	0.399949	0.418879	0.433403	0.418879	136.714	102.899	72.084	102.899	355.879	322.064	291.249	322.064	546.856	411.598
		Laem Chabang	3	657.494	657.494	657.494	657.494	219.165	219.165	219.165	219.165	67.2919	51.044	39.5412	51.044	286.456	270.209	258.706	270.209	201.876	153.132	118.623	153.132	859.369	810.626	776.117	810.626	143.786	143.786	143.786	143.786	1299.6	1299.6	1299.6	1299.6	0.501947	0.53213	0.55579	0.53213	159.489	102.899	72.084	102.899	378.653	322.064	291.249	322.064	478.466	308.698
		Xiamen	6	1314.99	1314.99	1314.99	1314.99	219.165	219.165	219.165	219.165	33.6459	25.522	19.7706	25.522	252.81	244.687	238.935	244.687	201.876	153.132	118.623	153.132	1516.86	1468.12	1433.61	1468.12	71.893	71.893	71.893	71.893	1299.6	1299.6	1299.6	1299.6	0.284375	0.293817	0.300889	0.293817	91.1427	69.1361	53.5561	69.1361	310.307	288.301	272.721	288.301	546.856	414.816
		Shanghai	4	876.658	876.658	876.658	876.658	219.165	219.165	219.165	219.165	50.4689	38.283	29.6559	38.283	269.633	257.448	248.82	257.448	201.876	153.132	118.623	153.132	1078.53	1029.79	995.282	1029.79	107.84	107.84	107.84	107.84	1299.6	1299.6	1299.6	1299.6	0.399949	0.418879	0.433403	0.418879	136.714	102.899	72.084	102.899	355.879	322.064	291.249	322.064	546.856	411.598
		Qingdao	2	438.329	438.329	438.329	438.329	219.165	219.165	219.165	219.165	100.938	76.5661	59.3117	76.5661	320.102	295.731	278.476	295.731	201.876	153.132	118.623	153.132	640.205	591.461	556.953	591.461	215.679	215.679	215.679	215.679	1299.6	1299.6	1299.6	1299.6	0.673781	0.729309	0.774497	0.729309	159.489	102.899	72.084	102.899	378.653	322.064	291.249	322.064	318.978	205.799
		Busan	0	0	0	0	0	0	0	0	0	0	0	0	0	0	0	0	0	0	0	0	0	0	0	0	0	0	0	0	0	868.242	868.242	868.242	868.242	0.9	0.9	0.9	0.9	0	0	0	0	0	0	0	0	0	0
		Total/voyage	33	7232.43	7232.43	7232.43	7232.43													1933.98	1430.86	1093.16	1430.86	9166.41	8663.29	8325.59	8663.29					14551.3	14449.5	14394	14449.5	0.450824	0.465248	0.477457	0.465248									4329.17	3093.42
[truncated: 58 more columns]

## Sheet: Supplementary Data 2
		Supplementary Data 2: Onshore regeneration (for 16 representative routes)										10% load limit for onshore regeneration scheme																20% load limit for onshore regeneration scheme																30% load limit for onshore regeneration scheme
				Propulsion CO2 emissions per segment (tonne)				Daily propulsion-related CO2 emissions (tonne/day)				CO2 captured per segment (tonne)				Daily CO2 captured (tonne/day)				SBCC load per segment (tonne)				Capture rate per segment				CO2 captured per segment (tonne)				Daily CO2 captured (tonne/day)				SBCC load per segment (tonne)				Capture rate per segment				CO2 captured per segment (tonne)				Daily CO2 captured (tonne/day)
		FEW 3	Transportation days per segment (days)	MEA	PZ	NE-2	DES	MEA	PZ	NE-2	DES	MEA	PZ	NE-2	DES	MEA	PZ	NE-2	DES	MEA	PZ	NE-2	DES	MEA	PZ	NE-2	DES	MEA	PZ	NE-2	DES	MEA	PZ	NE-2	DES	MEA	PZ	NE-2	DES	MEA	PZ	NE-2	DES	MEA	PZ	NE-2	DES	MEA	PZ
		Qingdao	-	0	0	0	0	0	0	0	0	0	0	0	0	0	0	0	0	0	0	0	0	0	0	0	0	0	0	0	0	0	0	0	0	0	0	0	0	0	0	0	0	0	0	0	0	0	0
		Gwangyang	2	1389.05	1389.05	1389.05	1389.05	694.527	694.527	694.527	694.527	627.058	897.042	468.022	1250.15	313.529	448.521	234.011	625.074	6458.7	6458.7	6458.7	5000.59	0.451428	0.645793	0.336936	0.9	1250.15	1250.15	936.043	1250.15	625.074	625.074	468.022	625.074	12876.5	9001.07	12917.4	5000.59	0.9	0.9	0.673871	0.9	1250.15	1250.15	1250.15	1250.15	625.074	625.074
		Shanghai	3	2083.58	2083.58	2083.58	2083.58	694.527	694.527	694.527	694.527	627.058	897.042	468.022	1614.68	209.019	299.014	156.007	538.225	6458.7	6458.7	6458.7	6458.7	0.300952	0.430529	0.224624	0.774952	1254.12	1794.08	936.043	1875.22	418.039	598.028	312.014	625.074	12917.4	12917.4	12917.4	7500.89	0.601904	0.861058	0.449247	0.9	1875.22	1875.22	1404.07	1875.22	625.074	625.074
		Ningbo	2	1389.05	1389.05	1389.05	1389.05	694.527	694.527	694.527	694.527	627.058	897.042	468.022	1250.15	313.529	448.521	234.011	625.074	6458.7	6458.7	6458.7	5000.59	0.451428	0.645793	0.336936	0.9	1250.15	1250.15	936.043	1250.15	625.074	625.074	468.022	625.074	12876.5	9001.07	12917.4	5000.59	0.9	0.9	0.673871	0.9	1250.15	1250.15	1250.15	1250.15	625.074	625.074
		Shekou	4	2778.11	2778.11	2778.11	2778.11	694.527	694.527	694.527	694.527	627.058	897.042	468.022	1614.68	156.765	224.26	117.005	403.669	6458.7	6458.7	6458.7	6458.7	0.225714	0.322897	0.168468	0.581214	1254.12	1794.08	936.043	2500.3	313.529	448.521	234.011	625.074	12917.4	12917.4	12917.4	10001.2	0.451428	0.645793	0.336936	0.9	1881.17	2500.3	1404.07	2500.3	470.294	625.074
		Nansha New Port	1	694.527	694.527	694.527	694.527	694.527	694.527	694.527	694.527	625.074	625.074	468.022	625.074	625.074	625.074	468.022	625.074	6438.27	4500.53	6458.7	2500.3	0.9	0.9	0.673871	0.9	625.074	625.074	625.074	625.074	625.074	625.074	625.074	625.074	6438.27	4500.53	8626.03	2500.3	0.9	0.9	0.9	0.9	625.074	625.074	625.074	625.074	625.074	625.074
		Singapore	6	4167.16	4167.16	4167.16	4167.16	694.527	694.527	694.527	694.527	627.058	897.042	468.022	1614.68	104.51	149.507	78.0036	269.113	6458.7	6458.7	6458.7	6458.7	0.150476	0.215264	0.112312	0.387476	1254.12	1794.08	936.043	3229.35	209.019	299.014	156.007	538.225	12917.4	12917.4	12917.4	12917.4	0.300952	0.430529	0.224624	0.774952	1881.17	2691.12	1404.07	3750.45	313.529	448.521
		Tanjung Pelepas	2	1389.05	1389.05	1389.05	1389.05	694.527	694.527	694.527	694.527	627.058	897.042	468.022	1250.15	313.529	448.521	234.011	625.074	6458.7	6458.7	6458.7	5000.59	0.451428	0.645793	0.336936	0.9	1250.15	1250.15	936.043	1250.15	625.074	625.074	468.022	625.074	12876.5	9001.07	12917.4	5000.59	0.9	0.9	0.673871	0.9	1250.15	1250.15	1250.15	1250.15	625.074	625.074
		Tema	22	15279.6	15279.6	15279.6	15279.6	694.527	694.527	694.527	694.527	627.058	897.042	468.022	1614.68	28.5026	40.7746	21.2737	73.3943	6458.7	6458.7	6458.7	6458.7	0.0410389	0.0587085	0.0306305	0.105675	1254.12	1794.08	936.043	3229.35	57.0053	81.5492	42.5474	146.789	12917.4	12917.4	12917.4	12917.4	0.0820779	0.117417	0.061261	0.211351	1881.17	2691.12	1404.07	4844.02	85.5079	122.324
		Lekki	5	3472.63	3472.63	3472.63	3472.63	694.527	694.527	694.527	694.527	627.058	897.042	468.022	1614.68	125.412	179.408	93.6043	322.935	6458.7	6458.7	6458.7	6458.7	0.180571	0.258317	0.134774	0.464971	1254.12	1794.08	936.043	3125.37	250.823	358.817	187.209	625.074	12917.4	12917.4	12917.4	12501.5	0.361143	0.516635	0.269548	0.9	1881.17	2691.12	1404.07	3125.37	376.235	538.225
		Abidjan	3	2083.58	2083.58	2083.58	2083.58	694.527	694.527	694.527	694.527	627.058	897.042	468.022	1614.68	209.019	299.014	156.007	538.225	6458.7	6458.7	6458.7	6458.7	0.300952	0.430529	0.224624	0.774952	1254.12	1794.08	936.043	1875.22	418.039	598.028	312.014	625.074	12917.4	12917.4	12917.4	7500.89	0.601904	0.861058	0.449247	0.9	1875.22	1875.22	1404.07	1875.22	625.074	625.074
		Pointe Noire	7	4861.69	4861.69	4861.69	4861.69	694.527	694.527	694.527	694.527	627.058	897.042	468.022	1614.68	89.5798	128.149	66.8602	230.668	6458.7	6458.7	6458.7	6458.7	0.12898	0.184512	0.0962673	0.332122	1254.12	1794.08	936.043	3229.35	179.16	256.298	133.72	461.336	12917.4	12917.4	12917.4	12917.4	0.257959	0.369025	0.192535	0.664244	1881.17	2691.12	1404.07	4375.52	268.739	384.446
		Colombo	20	13890.5	13890.5	13890.5	13890.5	694.527	694.527	694.527	694.527	627.058	897.042	468.022	1614.68	31.3529	44.8521	23.4011	80.7338	6458.7	6458.7	6458.7	6458.7	0.0451428	0.0645793	0.0336936	0.116243	1254.12	1794.08	936.043	3229.35	62.7058	89.7042	46.8022	161.468	12917.4	12917.4	12917.4	12917.4	0.0902857	0.129159	0.0673871	0.232486	1881.17	2691.12	1404.07	4844.02	94.0587	134.556
		Singapore	5	3472.63	3472.63	3472.63	3472.63	694.527	694.527	694.527	694.527	627.058	897.042	468.022	1614.68	125.412	179.408	93.6043	322.935	6458.7	6458.7	6458.7	6458.7	0.180571	0.258317	0.134774	0.464971	1254.12	1794.08	936.043	3125.37	250.823	358.817	187.209	625.074	12917.4	12917.4	12917.4	12501.5	0.361143	0.516635	0.269548	0.9	1881.17	2691.12	1404.07	3125.37	376.235	538.225
		Xiamen	6	4167.16	4167.16	4167.16	4167.16	694.527	694.527	694.527	694.527	627.058	897.042	468.022	1614.68	104.51	149.507	78.0036	269.113	6458.7	6458.7	6458.7	6458.7	0.150476	0.215264	0.112312	0.387476	1254.12	1794.08	936.043	3229.35	209.019	299.014	156.007	538.225	12917.4	12917.4	12917.4	12917.4	0.300952	0.430529	0.224624	0.774952	1881.17	2691.12	1404.07	3750.45	313.529	448.521
		Total/voyage	88	61118.4	61118.4	61118.4	61118.4					8776.83	12286.6	6552.3	20522.3									0.143604	0.20103	0.107207	0.335779	16916.7	22316.4	12793.6	33023.8									0.276786	0.365133	0.209326	0.540325	23175.4	29464.1	18416.2	38441.5
		FEW 6	Transportation days per segment (days)	MEA	PZ	NE-2	DES	MEA	PZ	NE-2	DES	MEA	PZ	NE-2	DES	MEA	PZ	NE-2	DES	MEA	PZ	NE-2	DES	MEA	PZ	NE-2	DES	MEA	PZ	NE-2	DES	MEA	PZ	NE-2	DES	MEA	PZ	NE-2	DES	MEA	PZ	NE-2	DES	MEA	PZ	NE-2	DES	MEA	PZ
		Qingdao	-	0	0	0	0	0	0	0	0	0	0	0	0	0	0	0	0	0	0	0	0	0	0	0	0	0	0	0	0	0	0	0	0	0	0	0	0	0	0	0	0	0	0	0	0	0	0
		Shanghai	3	2010.12	2010.12	2010.12	2010.12	670.04	670.04	670.04	670.04	538.359	770.153	401.819	1386.28	179.453	256.718	133.94	462.092	5545.1	5545.1	5545.1	5545.1	0.267824	0.383137	0.199898	0.689647	1076.72	1540.31	803.638	1809.11	358.906	513.435	267.879	603.036	11090.2	11090.2	11090.2	7236.44	0.535648	0.766275	0.399796	0.9	1615.08	1809.11	1205.46	1809.11	538.359	603.036
		Ningbo	1	670.04	670.04	670.04	670.04	670.04	670.04	670.04	670.04	538.359	603.036	401.819	603.036	538.359	603.036	401.819	603.036	5545.1	4341.86	5545.1	2412.15	0.803473	0.9	0.599693	0.9	603.036	603.036	603.036	603.036	603.036	603.036	603.036	603.036	6211.27	4341.86	8321.9	2412.15	0.9	0.9	0.9	0.9	603.036	603.036	603.036	603.036	603.036	603.036
		Nansha New Port	4	2680.16	2680.16	2680.16	2680.16	670.04	670.04	670.04	670.04	538.359	770.153	401.819	1386.28	134.59	192.538	100.455	346.569	5545.1	5545.1	5545.1	5545.1	0.200868	0.287353	0.149923	0.517236	1076.72	1540.31	803.638	2412.15	269.18	385.076	200.909	603.036	11090.2	11090.2	11090.2	9648.58	0.401736	0.574706	0.299847	0.9	1615.08	2310.46	1205.46	2412.15	403.769	577.615
		Tanjung Pelepas	5	3350.2	3350.2	3350.2	3350.2	670.04	670.04	670.04	670.04	538.359	770.153	401.819	1386.28	107.672	154.031	80.3638	277.255	5545.1	5545.1	5545.1	5545.1	0.160695	0.229882	0.119939	0.413788	1076.72	1540.31	803.638	2772.55	215.344	308.061	160.728	554.51	11090.2	11090.2	11090.2	11090.2	0.321389	0.459765	0.239877	0.827577	1615.08	2310.46	1205.46	3015.18	323.016	462.092
		Singapore	1	670.04	670.04	670.04	670.04	670.04	670.04	670.04	670.04	538.359	603.036	401.819	603.036	538.359	603.036	401.819	603.036	5545.1	4341.86	5545.1	2412.15	0.803473	0.9	0.599693	0.9	603.036	603.036	603.036	603.036	603.036	603.036	603.036	603.036	6211.27	4341.86	8321.9	2412.15	0.9	0.9	0.9	0.9	603.036	603.036	603.036	603.036	603.036	603.036
		Pointe Noire	24	16081	16081	16081	16081	670.04	670.04	670.04	670.04	538.359	770.153	401.819	1386.28	22.4316	32.0897	16.7425	57.7615	5545.1	5545.1	5545.1	5545.1	0.033478	0.0478922	0.0249872	0.0862059	1076.72	1540.31	803.638	2772.55	44.8633	64.1794	33.4849	115.523	11090.2	11090.2	11090.2	11090.2	0.0669561	0.0957844	0.0499745	0.172412	1615.08	2310.46	1205.46	4158.82	67.2949	96.2691
		Kribi	4	2680.16	2680.16	2680.16	2680.16	670.04	670.04	670.04	670.04	538.359	770.153	401.819	1386.28	134.59	192.538	100.455	346.569	5545.1	5545.1	5545.1	5545.1	0.200868	0.287353	0.149923	0.517236	1076.72	1540.31	803.638	2412.15	269.18	385.076	200.909	603.036	11090.2	11090.2	11090.2	9648.58	0.401736	0.574706	0.299847	0.9	1615.08	2310.46	1205.46	2412.15	403.769	577.615
		Luanda	5	3350.2	3350.2	3350.2	3350.2	670.04	670.04	670.04	670.04	538.359	770.153	401.819	1386.28	107.672	154.031	80.3638	277.255	5545.1	5545.1	5545.1	5545.1	0.160695	0.229882	0.119939	0.413788	1076.72	1540.31	803.638	2772.55	215.344	308.061	160.728	554.51	11090.2	11090.2	11090.2	11090.2	0.321389	0.459765	0.239877	0.827577	1615.08	2310.46	1205.46	3015.18	323.016	462.092
		Walvis Bay	8	5360.32	5360.32	5360.32	5360.32	670.04	670.04	670.04	670.04	538.359	770.153	401.819	1386.28	67.2949	96.2691	50.2274	173.284	5545.1	5545.1	5545.1	5545.1	0.100434	0.143677	0.0749617	0.258618	1076.72	1540.31	803.638	2772.55	134.59	192.538	100.455	346.569	11090.2	11090.2	11090.2	11090.2	0.200868	0.287353	0.149923	0.517236	1615.08	2310.46	1205.46	4158.82	201.885	288.807
		Total/voyage	55	36852.2	36852.2	36852.2	36852.2	670.04	670.04	670.04	670.04	4845.23	6597.14	3616.37	10910									0.131477	0.179016	0.0981316	0.296047	8743.1	11988.2	6831.54	18929.7									0.237248	0.325305	0.185377	0.513664	12511.6	16877.9	9644.27	22187.5
		TP17 Eastbound	Transportation days per segment (days)	MEA	PZ	NE-2	DES	MEA	PZ	NE-2	DES	MEA	PZ	NE-2	DES	MEA	PZ	NE-2	DES	MEA	PZ	NE-2	DES	MEA	PZ	NE-2	DES	MEA	PZ	NE-2	DES	MEA	PZ	NE-2	DES	MEA	PZ	NE-2	DES	MEA	PZ	NE-2	DES	MEA	PZ	NE-2	DES	MEA	PZ
		Hong Kong	-	0	0	0	0	0	0	0	0	0	0	0	0	0	0	0	0	0	0	0	0	0	0	0	0	0	0	0	0	0	0	0	0	0	0	0	0	0	0	0	0	0	0	0	0	0	0
		Nansha New Port	1	577.761	577.761	577.761	577.761	577.761	577.761	577.761	577.761	519.985	519.985	397.71	519.985	519.985	519.985	397.71	519.985	5355.84	3743.89	5488.4	2079.94	0.9	0.9	0.688365	0.9	519.985	519.985	519.985	519.985	519.985	519.985	519.985	519.985	5355.84	3743.89	7175.79	2079.94	0.9	0.9	0.9	0.9	519.985	519.985	519.985	519.985	519.985	519.985
		Yantian	2	1155.52	1155.52	1155.52	1155.52	577.761	577.761	577.761	577.761	532.854	762.278	397.71	1039.97	266.427	381.139	198.855	519.985	5488.4	5488.4	5488.4	4159.88	0.461138	0.659683	0.344182	0.9	1039.97	1039.97	795.42	1039.97	519.985	519.985	397.71	519.985	10711.7	7487.78	10976.8	4159.88	0.9	0.9	0.688365	0.9	1039.97	1039.97	1039.97	1039.97	519.985	519.985
		Vung Tau	3	1733.28	1733.28	1733.28	1733.28	577.761	577.761	577.761	577.761	532.854	762.278	397.71	1372.1	177.618	254.093	132.57	457.367	5488.4	5488.4	5488.4	5488.4	0.307425	0.439789	0.229455	0.79162	1065.71	1524.56	795.42	1559.95	355.236	508.185	265.14	519.985	10976.8	10976.8	10976.8	6239.81	0.61485	0.879577	0.45891	0.9	1559.95	1559.95	1193.13	1559.95	519.985	519.985
		Singapore	2	1155.52	1155.52	1155.52	1155.52	577.761	577.761	577.761	577.761	532.854	762.278	397.71	1039.97	266.427	381.139	198.855	519.985	5488.4	5488.4	5488.4	4159.88	0.461138	0.659683	0.344182	0.9	1039.97	1039.97	795.42	1039.97	519.985	519.985	397.71	519.985	10711.7	7487.78	10976.8	4159.88	0.9	0.9	0.688365	0.9	1039.97	1039.97	1039.97	1039.97	519.985	519.985
		Newark	25	14444	14444	14444	14444	577.761	577.761	577.761	577.761	532.854	762.278	397.71	1372.1	21.3142	30.4911	15.9084	54.884	5488.4	5488.4	5488.4	5488.4	0.036891	0.0527746	0.0275346	0.0949944	1065.71	1524.56	795.42	2744.2	42.6283	60.9822	31.8168	109.768	10976.8	10976.8	10976.8	10976.8	0.073782	0.105549	0.0550692	0.189989	1598.56	2286.83	1193.13	4116.3	63.9425	91.4733
		Charleston	4	2311.04	2311.04	2311.04	2311.04	577.761	577.761	577.761	577.761	532.854	762.278	397.71	1372.1	133.214	190.569	99.4275	343.025	5488.4	5488.4	5488.4	5488.4	0.230569	0.329842	0.172091	0.593715	1065.71	1524.56	795.42	2079.94	266.427	381.139	198.855	519.985	10976.8	10976.8	10976.8	8319.75	0.461138	0.659683	0.344182	0.9	1598.56	2079.94	1193.13	2079.94	399.641	519.985
		Savannah	2	1155.52	1155.52	1155.52	1155.52	577.761	577.761	577.761	577.761	532.854	762.278	397.71	1039.97	266.427	381.139	198.855	519.985	5488.4	5488.4	5488.4	4159.88	0.461138	0.659683	0.344182	0.9	1039.97	1039.97	795.42	1039.97	519.985	519.985	397.71	519.985	10711.7	7487.78	10976.8	4159.88	0.9	0.9	0.688365	0.9	1039.97	1039.97	1039.97	1039.97	519.985	519.985
		Miami	3	1733.28	1733.28	1733.28	1733.28	577.761	577.761	577.761	577.761	532.854	762.278	397.71	1372.1	177.618	254.093	132.57	457.367	5488.4	5488.4	5488.4	5488.4	0.307425	0.439789	0.229455	0.79162	1065.71	1524.56	795.42	1559.95	355.236	508.185	265.14	519.985	10976.8	10976.8	10976.8	6239.81	0.61485	0.879577	0.45891	0.9	1559.95	1559.95	1193.13	1559.95	519.985	519.985
		Freeport	2	1155.52	1155.52	1155.52	1155.52	577.761	577.761	577.761	577.761	532.854	762.278	397.71	1039.97	266.427	381.139	198.855	519.985	5488.4	5488.4	5488.4	4159.88	0.461138	0.659683	0.344182	0.9	1039.97	1039.97	795.42	1039.97	519.985	519.985	397.71	519.985	10711.7	7487.78	10976.8	4159.88	0.9	0.9	0.688365	0.9	1039.97	1039.97	1039.97	1039.97	519.985	519.985
		Total/voyage	44	25421.5	25421.5	25421.5	25421.5	577.761	577.761	577.761	577.761	4782.82	6618.21	3579.39	10168.3									0.188141	0.260339	0.140802	0.399987	8942.7	10778.1	6883.35	12623.9									0.351777	0.423976	0.270769	0.496584	10996.9	12166.5	9452.38	13996
		AE11 Westbound	Transportation days per segment (days)	MEA	PZ	NE-2	DES	MEA	PZ	NE-2	DES	MEA	PZ	NE-2	DES	MEA	PZ	NE-2	DES	MEA	PZ	NE-2	DES	MEA	PZ	NE-2	DES	MEA	PZ	NE-2	DES	MEA	PZ	NE-2	DES	MEA	PZ	NE-2	DES	MEA	PZ	NE-2	DES	MEA	PZ	NE-2	DES	MEA	PZ
		Qingdao	-	0	0	0	0	0	0	0	0	0	0	0	0	0	0	0	0	0	0	0	0	0	0	0	0	0	0	0	0	0	0	0	0	0	0	0	0	0	0	0	0	0	0	0	0	0	0
		Busan	3	2293.94	2293.94	2293.94	2293.94	764.647	764.647	764.647	764.647	1286.83	1840.89	960.464	2064.55	428.945	613.63	320.155	688.183	13254.4	13254.4	13254.4	8258.19	0.560971	0.8025	0.418696	0.9	2064.55	2064.55	1920.93	2064.55	688.183	688.183	640.309	688.183	21264.8	14864.7	26508.8	8258.19	0.9	0.9	0.837391	0.9	2064.55	2064.55	2064.55	2064.55	688.183	688.183
		Ningbo	5	3823.24	3823.24	3823.24	3823.24	764.647	764.647	764.647	764.647	1286.83	1840.89	960.464	3313.6	257.367	368.178	192.093	662.72	13254.4	13254.4	13254.4	13254.4	0.336583	0.4815	0.251217	0.8667	2573.67	3440.91	1920.93	3440.91	514.734	688.183	384.186	688.183	26508.8	24774.6	26508.8	13763.7	0.673165	0.9	0.502435	0.9	3440.91	3440.91	2881.39	3440.91	688.183	688.183
		Shanghai	3	2293.94	2293.94	2293.94	2293.94	764.647	764.647	764.647	764.647	1286.83	1840.89	960.464	2064.55	428.945	613.63	320.155	688.183	13254.4	13254.4	13254.4	8258.19	0.560971	0.8025	0.418696	0.9	2064.55	2064.55	1920.93	2064.55	688.183	688.183	640.309	688.183	21264.8	14864.7	26508.8	8258.19	0.9	0.9	0.837391	0.9	2064.55	2064.55	2064.55	2064.55	688.183	688.183
		Xiamen	4	3058.59	3058.59	3058.59	3058.59	764.647	764.647	764.647	764.647	1286.83	1840.89	960.464	2752.73	321.709	460.222	240.116	688.183	13254.4	13254.4	13254.4	11010.9	0.420728	0.601875	0.314022	0.9	2573.67	2752.73	1920.93	2752.73	643.417	688.183	480.232	688.183	26508.8	19819.7	26508.8	11010.9	0.841456	0.9	0.628043	0.9	2752.73	2752.73	2752.73	2752.73	688.183	688.183
		Nansha New Port	1	764.647	764.647	764.647	764.647	764.647	764.647	764.647	764.647	688.183	688.183	688.183	688.183	688.183	688.183	688.183	688.183	7088.28	4954.92	9496.92	2752.73	0.9	0.9	0.9	0.9	688.183	688.183	688.183	688.183	688.183	688.183	688.183	688.183	7088.28	4954.92	9496.92	2752.73	0.9	0.9	0.9	0.9	688.183	688.183	688.183	688.183	688.183	688.183
		Yantian	1	764.647	764.647	764.647	764.647	764.647	764.647	764.647	764.647	688.183	688.183	688.183	688.183	688.183	688.183	688.183	688.183	7088.28	4954.92	9496.92	2752.73	0.9	0.9	0.9	0.9	688.183	688.183	688.183	688.183	688.183	688.183	688.183	688.183	7088.28	4954.92	9496.92	2752.73	0.9	0.9	0.9	0.9	688.183	688.183	688.183	688.183	688.183	688.183
		Singapore	5	3823.24	3823.24	3823.24	3823.24	764.647	764.647	764.647	764.647	1286.83	1840.89	960.464	3313.6	257.367	368.178	192.093	662.72	13254.4	13254.4	13254.4	13254.4	0.336583	0.4815	0.251217	0.8667	2573.67	3440.91	1920.93	3440.91	514.734	688.183	384.186	688.183	26508.8	24774.6	26508.8	13763.7	0.673165	0.9	0.502435	0.9	3440.91	3440.91	2881.39	3440.91	688.183	688.183
		Port Said East	15	11469.7	11469.7	11469.7	11469.7	764.647	764.647	764.647	764.647	1286.83	1840.89	960.464	3313.6	85.789	122.726	64.0309	220.907	13254.4	13254.4	13254.4	13254.4	0.112194	0.1605	0.0837391	0.2889	2573.67	3681.78	1920.93	6627.2	171.578	245.452	128.062	441.813	26508.8	26508.8	26508.8	26508.8	0.224388	0.321	0.167478	0.5778	3860.5	5522.67	2881.39	9940.8	257.367	368.178
		Gioia Tauro	4	3058.59	3058.59	3058.59	3058.59	764.647	764.647	764.647	764.647	1286.83	1840.89	960.464	2752.73	321.709	460.222	240.116	688.183	13254.4	13254.4	13254.4	11010.9	0.420728	0.601875	0.314022	0.9	2573.67	2752.73	1920.93	2752.73	643.417	688.183	480.232	688.183	26508.8	19819.7	26508.8	11010.9	0.841456	0.9	0.628043	0.9	2752.73	2752.73	2752.73	2752.73	688.183	688.183
		Barcelona	4	3058.59	3058.59	3058.59	3058.59	764.647	764.647	764.647	764.647	1286.83	1840.89	960.464	2752.73	321.709	460.222	240.116	688.183	13254.4	13254.4	13254.4	11010.9	0.420728	0.601875	0.314022	0.9	2573.67	2752.73	1920.93	2752.73	643.417	688.183	480.232	688.183	26508.8	19819.7	26508.8	11010.9	0.841456	0.9	0.628043	0.9	2752.73	2752.73	2752.73	2752.73	688.183	688.183
		Valencia	4	3058.59	3058.59	3058.59	3058.59	764.647	764.647	764.647	764.647	1286.83	1840.89	960.464	2752.73	321.709	460.222	240.116	688.183	13254.4	13254.4	13254.4	11010.9	0.420728	0.601875	0.314022	0.9	2573.67	2752.73	1920.93	2752.73	643.417	688.183	480.232	688.183	26508.8	19819.7	26508.8	11010.9	0.841456	0.9	0.628043	0.9	2752.73	2752.73	2752.73	2752.73	688.183	688.183
		Total/voyage	49	37467.7	37467.7	37467.7	37467.7	764.647	764.647	764.647	764.647	12957.9	17944.4	10020.5	26457.2									0.345841	0.478929	0.267445	0.706133	23521.2	27080	18664.7	30025.4									0.627771	0.722755	0.498154	0.801367	27258.7	28920.9	25160.6	33339
		AE7 Eastbound	Transportation days per segment (days)	MEA	PZ	NE-2	DES	MEA	PZ	NE-2	DES	MEA	PZ	NE-2	DES	MEA	PZ	NE-2	DES	MEA	PZ	NE-2	DES	MEA	PZ	NE-2	DES	MEA	PZ	NE-2	DES	MEA	PZ	NE-2	DES	MEA	PZ	NE-2	DES	MEA	PZ	NE-2	DES	MEA	PZ	NE-2	DES	MEA	PZ
		Hamburg	-	0	0	0	0	0	0	0	0	0	0	0	0	0	0	0	0	0	0	0	0	0	0	0	0	0	0	0	0	0	0	0	0	0	0	0	0	0	0	0	0	0	0	0	0	0	0
		Antwerp	2	1112.21	1112.21	1112.21	1112.21	556.107	556.107	556.107	556.107	769.66	1000.99	574.457	1000.99	384.83	500.497	287.228	500.497	7927.5	7207.15	7927.5	4003.97	0.692007	0.9	0.516498	0.9	1000.99	1000.99	1000.99	1000.99	500.497	500.497	500.497	500.497	10310.2	7207.15	13813.7	4003.97	0.9	0.9	0.9	0.9	1000.99	1000.99	1000.99	1000.99	500.497	500.497
		London Gateway	2	1112.21	1112.21	1112.21	1112.21	556.107	556.107	556.107	556.107	769.66	1000.99	574.457	1000.99	384.83	500.497	287.228	500.497	7927.5	7207.15	7927.5	4003.97	0.692007	0.9	0.516498	0.9	1000.99	1000.99	1000.99	1000.99	500.497	500.497	500.497	500.497	10310.2	7207.15	13813.7	4003.97	0.9	0.9	0.9	0.9	1000.99	1000.99	1000.99	1000.99	500.497	500.497
		Le Havre	2	1112.21	1112.21	1112.21	1112.21	556.107	556.107	556.107	556.107	769.66	1000.99	574.457	1000.99	384.83	500.497	287.228	500.497	7927.5	7207.15	7927.5	4003.97	0.692007	0.9	0.516498	0.9	1000.99	1000.99	1000.99	1000.99	500.497	500.497	500.497	500.497	10310.2	7207.15	13813.7	4003.97	0.9	0.9	0.9	0.9	1000.99	1000.99	1000.99	1000.99	500.497	500.497
		Port Tangier Mediterranee	7	3892.75	3892.75	3892.75	3892.75	556.107	556.107	556.107	556.107	769.66	1101.04	574.457	1981.88	109.951	157.292	82.0652	283.125	7927.5	7927.5	7927.5	7927.5	0.197716	0.282844	0.147571	0.509119	1539.32	2202.08	1148.91	3503.48	219.903	314.583	164.13	500.497	15855	15855	15855	14013.9	0.395433	0.565688	0.295142	0.9	2308.98	3303.12	1723.37	3503.48	329.854	471.875
		Jeddah	9	5004.97	5004.97	5004.97	5004.97	556.107	556.107	556.107	556.107	769.66	1101.04	574.457	1981.88	85.5178	122.338	63.8285	220.208	7927.5	7927.5	7927.5	7927.5	0.153779	0.21999	0.114777	0.395982	1539.32	2202.08	1148.91	3963.75	171.036	244.676	127.657	440.417	15855	15855	15855	15855	0.307559	0.43998	0.229555	0.791964	2308.98	3303.12	1723.37	4504.47	256.553	367.014
		Abu Dhabi	7	3892.75	3892.75	3892.75	3892.75	556.107	556.107	556.107	556.107	769.66	1101.04	574.457	1981.88	109.951	157.292	82.0652	283.125	7927.5	7927.5	7927.5	7927.5	0.197716	0.282844	0.147571	0.509119	1539.32	2202.08	1148.91	3503.48	219.903	314.583	164.13	500.497	15855	15855	15855	14013.9	0.395433	0.565688	0.295142	0.9	2308.98	3303.12	1723.37	3503.48	329.854	471.875
		Jebel Ali	2	1112.21	1112.21	1112.21	1112.21	556.107	556.107	556.107	556.107	769.66	1000.99	574.457	1000.99	384.83	500.497	287.228	500.497	7927.5	7207.15	7927.5	4003.97	0.692007	0.9	0.516498	0.9	1000.99	1000.99	1000.99	1000.99	500.497	500.497	500.497	500.497	10310.2	7207.15	13813.7	4003.97	0.9	0.9	0.9	0.9	1000.99	1000.99	1000.99	1000.99	500.497	500.497
		Ningbo	18	10009.9	10009.9	10009.9	10009.9	556.107	556.107	556.107	556.107	769.66	1101.04	574.457	1981.88	42.7589	61.169	31.9143	110.104	7927.5	7927.5	7927.5	7927.5	0.0768897	0.109995	0.0573887	0.197991	1539.32	2202.08	1148.91	3963.75	85.5178	122.338	63.8285	220.208	15855	15855	15855	15855	0.153779	0.21999	0.114777	0.395982	2308.98	3303.12	1723.37	5945.62	128.277	183.507
		Shanghai	3	1668.32	1668.32	1668.32	1668.32	556.107	556.107	556.107	556.107	769.66	1101.04	574.457	1501.49	256.553	367.014	191.486	500.497	7927.5	7927.5	7927.5	6005.96	0.461338	0.65997	0.344332	0.9	1501.49	1501.49	1148.91	1501.49	500.497	500.497	382.971	500.497	15465.3	10810.7	15855	6005.96	0.9	0.9	0.688664	0.9	1501.49	1501.49	1501.49	1501.49	500.497	500.497
		Nansha New Port	4	2224.43	2224.43	2224.43	2224.43	556.107	556.107	556.107	556.107	769.66	1101.04	574.457	1981.88	192.415	275.26	143.614	495.469	7927.5	7927.5	7927.5	7927.5	0.346003	0.494977	0.258249	0.890959	1539.32	2001.99	1148.91	2001.99	384.83	500.497	287.228	500.497	15855	14414.3	15855	8007.94	0.692007	0.9	0.516498	0.9	2001.99	2001.99	1723.37	2001.99	500.497	500.497
		Yantian	1	556.107	556.107	556.107	556.107	556.107	556.107	556.107	556.107	500.497	500.497	500.497	500.497	500.497	500.497	500.497	500.497	5155.11	3603.58	6906.85	2001.99	0.9	0.9	0.9	0.9	500.497	500.497	500.497	500.497	500.497	500.497	500.497	500.497	5155.11	3603.58	6906.85	2001.99	0.9	0.9	0.9	0.9	500.497	500.497	500.497	500.497	500.497	500.497
		Total/voyage	57	31698.1	31698.1	31698.1	31698.1	556.107	556.107	556.107	556.107	8197.1	11110.7	6245.06	15915.3									0.258599	0.350517	0.197017	0.502091	13702.6	16816.3	11397.9	22942.4									0.432283	0.530514	0.359578	0.723778	17243.9	21220.4	14622.8	25465
		AE7 Westbound	Transportation days per segment (days)	MEA	PZ	NE-2	DES	MEA	PZ	NE-2	DES	MEA	PZ	NE-2	DES	MEA	PZ	NE-2	DES	MEA	PZ	NE-2	DES	MEA	PZ	NE-2	DES	MEA	PZ	NE-2	DES	MEA	PZ	NE-2	DES	MEA	PZ	NE-2	DES	MEA	PZ	NE-2	DES	MEA	PZ	NE-2	DES	MEA	PZ
		Ningbo	-	0	0	0	0	0	0	0	0	0	0	0	0	0	0	0	0	0	0	0	0	0	0	0	0	0	0	0	0	0	0	0	0	0	0	0	0	0	0	0	0	0	0	0	0	0	0
		Shanghai	2	1112.21	1112.21	1112.21	1112.21	556.107	556.107	556.107	556.107	774.816	1000.99	578.304	1000.99	387.408	500.497	289.152	500.497	7980.6	7207.15	7980.6	4003.97	0.696642	0.9	0.519958	0.9	1000.99	1000.99	1000.99	1000.99	500.497	500.497	500.497	500.497	10310.2	7207.15	13813.7	4003.97	0.9	0.9	0.9	0.9	1000.99	1000.99	1000.99	1000.99	500.497	500.497
		Nansha New Port	3	1668.32	1668.32	1668.32	1668.32	556.107	556.107	556.107	556.107	774.816	1108.42	578.304	1501.49	258.272	369.472	192.768	500.497	7980.6	7980.6	7980.6	6005.96	0.464428	0.66439	0.346638	0.9	1501.49	1501.49	1156.61	1501.49	500.497	500.497	385.536	500.497	15465.3	10810.7	15961.2	6005.96	0.9	0.9	0.693277	0.9	1501.49	1501.49	1501.49	1501.49	500.497	500.497
		Yantian	2	1112.21	1112.21	1112.21	1112.21	556.107	556.107	556.107	556.107	774.816	1000.99	578.304	1000.99	387.408	500.497	289.152	500.497	7980.6	7207.15	7980.6	4003.97	0.696642	0.9	0.519958	0.9	1000.99	1000.99	1000.99	1000.99	500.497	500.497	500.497	500.497	10310.2	7207.15	13813.7	4003.97	0.9	0.9	0.9	0.9	1000.99	1000.99	1000.99	1000.99	500.497	500.497
		Tanjung Pelepas	5	2780.54	2780.54	2780.54	2780.54	556.107	556.107	556.107	556.107	774.816	1108.42	578.304	1995.15	154.963	221.683	115.661	399.03	7980.6	7980.6	7980.6	7980.6	0.278657	0.398634	0.207983	0.717541	1549.63	2216.83	1156.61	2502.48	309.926	443.367	231.322	500.497	15961.2	15961.2	15961.2	10009.9	0.557314	0.797268	0.415966	0.9	2324.45	2502.48	1734.91	2502.48	464.889	500.497
		Colombo	5	2780.54	2780.54	2780.54	2780.54	556.107	556.107	556.107	556.107	774.816	1108.42	578.304	1995.15	154.963	221.683	115.661	399.03	7980.6	7980.6	7980.6	7980.6	0.278657	0.398634	0.207983	0.717541	1549.63	2216.83	1156.61	2502.48	309.926	443.367	231.322	500.497	15961.2	15961.2	15961.2	10009.9	0.557314	0.797268	0.415966	0.9	2324.45	2502.48	1734.91	2502.48	464.889	500.497
		Port Tangier Mediterranee	15	8341.61	8341.61	8341.61	8341.61	556.107	556.107	556.107	556.107	774.816	1108.42	578.304	1995.15	51.6544	73.8944	38.5536	133.01	7980.6	7980.6	7980.6	7980.6	0.0928856	0.132878	0.0693277	0.23918	1549.63	2216.83	1156.61	3990.3	103.309	147.789	77.1072	266.02	15961.2	15961.2	15961.2	15961.2	0.185771	0.265756	0.138655	0.478361	2324.45	3325.25	1734.91	5985.45	154.963	221.683
		Felixstowe	5	2780.54	2780.54	2780.54	2780.54	556.107	556.107	556.107	556.107	774.816	1108.42	578.304	1995.15	154.963	221.683	115.661	399.03	7980.6	7980.6	7980.6	7980.6	0.278657	0.398634	0.207983	0.717541	1549.63	2216.83	1156.61	2502.48	309.926	443.367	231.322	500.497	15961.2	15961.2	15961.2	10009.9	0.557314	0.797268	0.415966	0.9	2324.45	2502.48	1734.91	2502.48	464.889	500.497
		Hamburg	2	1112.21	1112.21	1112.21	1112.21	556.107	556.107	556.107	556.107	774.816	1000.99	578.304	1000.99	387.408	500.497	289.152	500.497	7980.6	7207.15	7980.6	4003.97	0.696642	0.9	0.519958	0.9	1000.99	1000.99	1000.99	1000.99	500.497	500.497	500.497	500.497	10310.2	7207.15	13813.7	4003.97	0.9	0.9	0.9	0.9	1000.99	1000.99	1000.99	1000.99	500.497	500.497
		Antwerp	4	2224.43	2224.43	2224.43	2224.43	556.107	556.107	556.107	556.107	774.816	1108.42	578.304	1995.15	193.704	277.104	144.576	498.788	7980.6	7980.6	7980.6	7980.6	0.348321	0.498293	0.259979	0.896927	1549.63	2001.99	1156.61	2001.99	387.408	500.497	289.152	500.497	15961.2	14414.3	15961.2	8007.94	0.696642	0.9	0.519958	0.9	2001.99	2001.99	1734.91	2001.99	500.497	500.497
		London Gateway	2	1112.21	1112.21	1112.21	1112.21	556.107	556.107	556.107	556.107	774.816	1000.99	578.304	1000.99	387.408	500.497	289.152	500.497	7980.6	7207.15	7980.6	4003.97	0.696642	0.9	0.519958	0.9	1000.99	1000.99	1000.99	1000.99	500.497	500.497	500.497	500.497	10310.2	7207.15	13813.7	4003.97	0.9	0.9	0.9	0.9	1000.99	1000.99	1000.99	1000.99	500.497	500.497
		Le Havre	2	1112.21	1112.21	1112.21	1112.21	556.107	556.107	556.107	556.107	774.816	1000.99	578.304	1000.99	387.408	500.497	289.152	500.497	7980.6	7207.15	7980.6	4003.97	0.696642	0.9	0.519958	0.9	1000.99	1000.99	1000.99	1000.99	500.497	500.497	500.497	500.497	10310.2	7207.15	13813.7	4003.97	0.9	0.9	0.9	0.9	1000.99	1000.99	1000.99	1000.99	500.497	500.497
		Total/voyage	47	26137	26137	26137	26137	556.107	556.107	556.107	556.107	8522.97	11655.5	6361.35	16482.2									0.326088	0.445937	0.243384	0.630607	14254.6	17375.8	11944.6	20006.2									0.54538	0.664795	0.457	0.765434	17806.2	19341.1	15181	22001.3
		TP17 Westbound	Transportation days per segment (days)	MEA	PZ	NE-2	DES	MEA	PZ	NE-2	DES	MEA	PZ	NE-2	DES	MEA	PZ	NE-2	DES	MEA	PZ	NE-2	DES	MEA	PZ	NE-2	DES	MEA	PZ	NE-2	DES	MEA	PZ	NE-2	DES	MEA	PZ	NE-2	DES	MEA	PZ	NE-2	DES	MEA	PZ	NE-2	DES	MEA	PZ
		Newark	-	0	0	0	0	0	0	0	0	0	0	0	0	0	0	0	0	0	0	0	0	0	0	0	0	0	0	0	0	0	0	0	0	0	0	0	0	0	0	0	0	0	0	0	0	0	0
		Savannah	4	2778.11	2778.11	2778.11	2778.11	694.527	694.527	694.527	694.527	828.913	1185.81	618.681	2134.45	207.228	296.451	154.67	533.613	8537.8	8537.8	8537.8	8537.8	0.298373	0.426839	0.222699	0.768311	1657.83	2371.61	1237.36	2500.3	414.456	592.903	309.341	625.074	17075.6	17075.6	17075.6	10001.2	0.596746	0.853679	0.445398	0.9	2486.74	2500.3	1856.04	2500.3	621.684	625.074
		Miami	3	2083.58	2083.58	2083.58	2083.58	694.527	694.527	694.527	694.527	828.913	1185.81	618.681	1875.22	276.304	395.269	206.227	625.074	8537.8	8537.8	8537.8	7500.89	0.397831	0.569119	0.296932	0.9	1657.83	1875.22	1237.36	1875.22	552.608	625.074	412.454	625.074	17075.6	13501.6	17075.6	7500.89	0.795662	0.9	0.593863	0.9	1875.22	1875.22	1856.04	1875.22	625.074	625.074
		Freeport	1	694.527	694.527	694.527	694.527	694.527	694.527	694.527	694.527	625.074	625.074	618.681	625.074	625.074	625.074	618.681	625.074	6438.27	4500.53	8537.8	2500.3	0.9	0.9	0.890795	0.9	625.074	625.074	625.074	625.074	625.074	625.074	625.074	625.074	6438.27	4500.53	8626.03	2500.3	0.9	0.9	0.9	0.9	625.074	625.074	625.074	625.074	625.074	625.074
		Suez Canal	16	11112.4	11112.4	11112.4	11112.4	694.527	694.527	694.527	694.527	828.913	1185.81	618.681	2134.45	51.807	74.1128	38.6676	133.403	8537.8	8537.8	8537.8	8537.8	0.0745933	0.10671	0.0556747	0.192078	1657.83	2371.61	1237.36	4268.9	103.614	148.226	77.3351	266.806	17075.6	17075.6	17075.6	17075.6	0.149187	0.21342	0.111349	0.384155	2486.74	3557.42	1856.04	6403.35	155.421	222.339
		Tanjung Pelepas	12	8334.32	8334.32	8334.32	8334.32	694.527	694.527	694.527	694.527	828.913	1185.81	618.681	2134.45	69.0761	98.8171	51.5568	177.871	8537.8	8537.8	8537.8	8537.8	0.0994577	0.14228	0.0742329	0.256104	1657.83	2371.61	1237.36	4268.9	138.152	197.634	103.114	355.742	17075.6	17075.6	17075.6	17075.6	0.198915	0.28456	0.148466	0.512207	2486.74	3557.42	1856.04	6403.35	207.228	296.451
		Hong Kong	5	3472.63	3472.63	3472.63	3472.63	694.527	694.527	694.527	694.527	828.913	1185.81	618.681	2134.45	165.783	237.161	123.736	426.89	8537.8	8537.8	8537.8	8537.8	0.238698	0.341471	0.178159	0.614649	1657.83	2371.61	1237.36	3125.37	331.565	474.322	247.472	625.074	17075.6	17075.6	17075.6	12501.5	0.477397	0.682943	0.356318	0.9	2486.74	3125.37	1856.04	3125.37	497.348	625.074
		Nansha New Port	1	694.527	694.527	694.527	694.527	694.527	694.527	694.527	694.527	625.074	625.074	618.681	625.074	625.074	625.074	618.681	625.074	6438.27	4500.53	8537.8	2500.3	0.9	0.9	0.890795	0.9	625.074	625.074	625.074	625.074	625.074	625.074	625.074	625.074	6438.27	4500.53	8626.03	2500.3	0.9	0.9	0.9	0.9	625.074	625.074	625.074	625.074	625.074	625.074
		Yantian	2	1389.05	1389.05	1389.05	1389.05	694.527	694.527	694.527	694.527	828.913	1185.81	618.681	1250.15	414.456	592.903	309.341	625.074	8537.8	8537.8	8537.8	5000.59	0.596746	0.853679	0.445398	0.9	1250.15	1250.15	1237.36	1250.15	625.074	625.074	618.681	625.074	12876.5	9001.07	17075.6	5000.59	0.9	0.9	0.890795	0.9	1250.15	1250.15	1250.15	1250.15	625.074	625.074
		Vung Tau	3	2083.58	2083.58	2083.58	2083.58	694.527	694.527	694.527	694.527	828.913	1185.81	618.681	1875.22	276.304	395.269	206.227	625.074	8537.8	8537.8	8537.8	7500.89	0.397831	0.569119	0.296932	0.9	1657.83	1875.22	1237.36	1875.22	552.608	625.074	412.454	625.074	17075.6	13501.6	17075.6	7500.89	0.795662	0.9	0.593863	0.9	1875.22	1875.22	1856.04	1875.22	625.074	625.074
		Singapore	3	2083.58	2083.58	2083.58	2083.58	694.527	694.527	694.527	694.527	828.913	1185.81	618.681	1875.22	276.304	395.269	206.227	625.074	8537.8	8537.8	8537.8	7500.89	0.397831	0.569119	0.296932	0.9	1657.83	1875.22	1237.36	1875.22	552.608	625.074	412.454	625.074	17075.6	13501.6	17075.6	7500.89	0.795662	0.9	0.593863	0.9	1875.22	1875.22	1856.04	1875.22	625.074	625.074
		Total/voyage	50	34726.3	34726.3	34726.3	34726.3	694.527	694.527	694.527	694.527	7881.45	10736.6	6186.81	16663.8									0.226959	0.309177	0.178159	0.479859	14105.1	17612.4	11149	22289.4									0.406178	0.507177	0.321054	0.641859	18072.9	20866.5	15492.6	26558.3
		TP2 Eastbound	Transportation days per segment (days)	MEA	PZ	NE-2	DES	MEA	PZ	NE-2	DES	MEA	PZ	NE-2	DES	MEA	PZ	NE-2	DES	MEA	PZ	NE-2	DES	MEA	PZ	NE-2	DES	MEA	PZ	NE-2	DES	MEA	PZ	NE-2	DES	MEA	PZ	NE-2	DES	MEA	PZ	NE-2	DES	MEA	PZ	NE-2	DES	MEA	PZ
		Nansha New Port	-	0	0	0	0	0	0	0	0	0	0	0	0	0	0	0	0	0	0	0	0	0	0	0	0	0	0	0	0	0	0	0	0	0	0	0	0	0	0	0	0	0	0	0	0	0	0
		Yantian	1	730.953	730.953	730.953	730.953	730.953	730.953	730.953	730.953	657.858	657.858	652.413	657.858	657.858	657.858	652.413	657.858	6775.94	4736.58	9003.3	2631.43	0.9	0.9	0.892551	0.9	657.858	657.858	657.858	657.858	657.858	657.858	657.858	657.858	6775.94	4736.58	9078.44	2631.43	0.9	0.9	0.9	0.9	657.858	657.858	657.858	657.858	657.858	657.858
		Ningbo	3	2192.86	2192.86	2192.86	2192.86	730.953	730.953	730.953	730.953	874.107	1250.46	652.413	1973.57	291.369	416.819	217.471	657.858	9003.3	9003.3	9003.3	7894.29	0.398615	0.570241	0.297517	0.9	1748.21	1973.57	1304.83	1973.57	582.738	657.858	434.942	657.858	18006.6	14209.7	18006.6	7894.29	0.79723	0.9	0.595034	0.9	1973.57	1973.57	1957.24	1973.57	657.858	657.858
		Shanghai	3	2192.86	2192.86	2192.86	2192.86	730.953	730.953	730.953	730.953	874.107	1250.46	652.413	1973.57	291.369	416.819	217.471	657.858	9003.3	9003.3	9003.3	7894.29	0.398615	0.570241	0.297517	0.9	1748.21	1973.57	1304.83	1973.57	582.738	657.858	434.942	657.858	18006.6	14209.7	18006.6	7894.29	0.79723	0.9	0.595034	0.9	1973.57	1973.57	1957.24	1973.57	657.858	657.858
		Long Beach	15	10964.3	10964.3	10964.3	10964.3	730.953	730.953	730.953	730.953	874.107	1250.46	652.413	2250.83	58.2738	83.3639	43.4942	150.055	9003.3	9003.3	9003.3	9003.3	0.079723	0.114048	0.0595034	0.205287	1748.21	2500.92	1304.83	4501.65	116.548	166.728	86.9884	300.11	18006.6	18006.6	18006.6	18006.6	0.159446	0.228096	0.119007	0.410573	2622.32	3751.37	1957.24	6752.47	174.821	250.092
		Total/voyage	22	16081	16081	16081	16081	730.953	730.953	730.953	730.953	3280.18	4409.23	2609.65	6855.83									0.203979	0.274189	0.162282	0.426332	5902.5	7105.92	4572.34	9106.66									0.367049	0.441884	0.284332	0.5663	7227.33	8356.38	6529.58	11357.5
		TP2 Westbound	Transportation days per segment (days)	MEA	PZ	NE-2	DES	MEA	PZ	NE-2	DES	MEA	PZ	NE-2	DES	MEA	PZ	NE-2	DES	MEA	PZ	NE-2	DES	MEA	PZ	NE-2	DES	MEA	PZ	NE-2	DES	MEA	PZ	NE-2	DES	MEA	PZ	NE-2	DES	MEA	PZ	NE-2	DES	MEA	PZ	NE-2	DES	MEA	PZ
		Long Beach	-	0	0	0	0	0	0	0	0	0	0	0	0	0	0	0	0	0	0	0	0	0	0	0	0	0	0	0	0	0	0	0	0	0	0	0	0	0	0	0	0	0	0	0	0	0	0
		Busan	20	14619.1	14619.1	14619.1	14619.1	730.953	730.953	730.953	730.953	874.107	1250.46	652.413	2250.83	43.7053	62.5229	32.6207	112.541	9003.3	9003.3	9003.3	9003.3	0.0597923	0.0855361	0.0446276	0.153965	1748.21	2500.92	1304.83	4501.65	87.4107	125.046	65.2413	225.083	18006.6	18006.6	18006.6	18006.6	0.119585	0.171072	0.0892551	0.30793	2622.32	3751.37	1957.24	6752.47	131.116	187.569
		Nansha New Port	13	9502.39	9502.39	9502.39	9502.39	730.953	730.953	730.953	730.953	874.107	1250.46	652.413	2250.83	67.239	96.1891	50.1856	173.14	9003.3	9003.3	9003.3	9003.3	0.0919881	0.131594	0.0686578	0.236869	1748.21	2500.92	1304.83	4501.65	134.478	192.378	100.371	346.281	18006.6	18006.6	18006.6	18006.6	0.183976	0.263188	0.137316	0.473739	2622.32	3751.37	1957.24	6752.47	201.717	288.567
		Yantian	2	1461.91	1461.91	1461.91	1461.91	730.953	730.953	730.953	730.953	874.107	1250.46	652.413	1315.72	437.053	625.229	326.207	657.858	9003.3	9003.3	9003.3	5262.86	0.597923	0.855361	0.446276	0.9	1315.72	1315.72	1304.83	1315.72	657.858	657.858	652.413	657.858	13551.9	9473.15	18006.6	5262.86	0.9	0.9	0.892551	0.9	1315.72	1315.72	1315.72	1315.72	657.858	657.858
		Ningbo	4	2923.81	2923.81	2923.81	2923.81	730.953	730.953	730.953	730.953	874.107	1250.46	652.413	2250.83	218.527	312.615	163.103	562.706	9003.3	9003.3	9003.3	9003.3	0.298961	0.427681	0.223138	0.769825	1748.21	2500.92	1304.83	2631.43	437.053	625.229	326.207	657.858	18006.6	18006.6	18006.6	10525.7	0.597923	0.855361	0.446276	0.9	2631.43	2631.43	1957.24	2631.43	657.858	657.858
		Shanghai	3	2192.86	2192.86	2192.86	2192.86	730.953	730.953	730.953	730.953	874.107	1250.46	652.413	1973.57	291.369	416.819	217.471	657.858	9003.3	9003.3	9003.3	7894.29	0.398615	0.570241	0.297517	0.9	1748.21	1973.57	1304.83	1973.57	582.738	657.858	434.942	657.858	18006.6	14209.7	18006.6	7894.29	0.79723	0.9	0.595034	0.9	1973.57	1973.57	1957.24	1973.57	657.858	657.858
		Total/voyage	42	30700	30700	30700	30700	730.953	730.953	730.953	730.953	4370.53	6252.29	3262.07	10041.8									0.142363	0.203657	0.106256	0.327093	8308.57	10792	6524.13	14924									0.270637	0.351532	0.212512	0.486124	11165.4	13423.5	9144.67	19425.7
		IA7	Transportation days per segment (days)	MEA	PZ	NE-2	DES	MEA	PZ	NE-2	DES	MEA	PZ	NE-2	DES	MEA	PZ	NE-2	DES	MEA	PZ	NE-2	DES	MEA	PZ	NE-2	DES	MEA	PZ	NE-2	DES	MEA	PZ	NE-2	DES	MEA	PZ	NE-2	DES	MEA	PZ	NE-2	DES	MEA	PZ	NE-2	DES	MEA	PZ
		Shantou	-	0	0	0	0	0	0	0	0	0	0	0	0	0	0	0	0	0	0	0	0	0	0	0	0	0	0	0	0	0	0	0	0	0	0	0	0	0	0	0	0	0	0	0	0	0	0
		Nansha New Port	2	325.408	325.408	325.408	325.408	162.704	162.704	162.704	162.704	120.893	172.944	90.2319	292.867	60.4466	86.4722	45.1159	146.433	1245.2	1245.2	1245.2	1171.47	0.371513	0.53147	0.277289	0.9	241.786	292.867	180.464	292.867	120.893	146.433	90.2319	146.433	2490.4	2108.64	2490.4	1171.47	0.743026	0.9	0.554577	0.9	292.867	292.867	270.696	292.867	146.433	146.433
		Yantian	1	162.704	162.704	162.704	162.704	162.704	162.704	162.704	162.704	120.893	146.433	90.2319	146.433	120.893	146.433	90.2319	146.433	1245.2	1054.32	1245.2	585.734	0.743026	0.9	0.554577	0.9	146.433	146.433	146.433	146.433	146.433	146.433	146.433	146.433	1508.26	1054.32	2020.78	585.734	0.9	0.9	0.9	0.9	146.433	146.433	146.433	146.433	146.433	146.433
		Hong Kong	1	162.704	162.704	162.704	162.704	162.704	162.704	162.704	162.704	120.893	146.433	90.2319	146.433	120.893	146.433	90.2319	146.433	1245.2	1054.32	1245.2	585.734	0.743026	0.9	0.554577	0.9	146.433	146.433	146.433	146.433	146.433	146.433	146.433	146.433	1508.26	1054.32	2020.78	585.734	0.9	0.9	0.9	0.9	146.433	146.433	146.433	146.433	146.433	146.433
		Tanjung Pelepas	4	650.815	650.815	650.815	650.815	162.704	162.704	162.704	162.704	120.893	172.944	90.2319	311.3	30.2233	43.2361	22.558	77.825	1245.2	1245.2	1245.2	1245.2	0.185756	0.265735	0.138644	0.478323	241.786	345.889	180.464	585.734	60.4466	86.4722	45.1159	146.433	2490.4	2490.4	2490.4	2342.94	0.371513	0.53147	0.277289	0.9	362.68	518.833	270.696	585.734	90.6699	129.708
		Port Klang	0	0	0	0	0	0	0	0	0	0	0	0	0	0	0	0	0	0	0	0	0	0	0	0	0	0	0	0	0	0	0	0	0	0	0	0	0	0	0	0	0	0	0	0	0	0	0
		Chittagong	8	1301.63	1301.63	1301.63	1301.63	162.704	162.704	162.704	162.704	120.893	172.944	90.2319	311.3	15.1117	21.6181	11.279	38.9125	1245.2	1245.2	1245.2	1245.2	0.0928782	0.132867	0.0693222	0.239161	241.786	345.889	180.464	622.6	30.2233	43.2361	22.558	77.825	2490.4	2490.4	2490.4	2490.4	0.185756	0.265735	0.138644	0.478323	362.68	518.833	270.696	933.9	45.335	64.8542
		Yangon	3	488.112	488.112	488.112	488.112	162.704	162.704	162.704	162.704	120.893	172.944	90.2319	311.3	40.2977	57.6481	30.0773	103.767	1245.2	1245.2	1245.2	1245.2	0.247675	0.354313	0.184859	0.637764	241.786	345.889	180.464	439.3	80.5955	115.296	60.1546	146.433	2490.4	2490.4	2490.4	1757.2	0.495351	0.708627	0.369718	0.9	362.68	439.3	270.696	439.3	120.893	146.433
		Port Klang	5	813.519	813.519	813.519	813.519	162.704	162.704	162.704	162.704	120.893	172.944	90.2319	311.3	24.1786	34.5889	18.0464	62.26	1245.2	1245.2	1245.2	1245.2	0.148605	0.212588	0.110915	0.382658	241.786	345.889	180.464	622.6	48.3573	69.1778	36.0928	124.52	2490.4	2490.4	2490.4	2490.4	0.29721	0.425176	0.221831	0.765317	362.68	518.833	270.696	732.167	72.5359	103.767
		Tanjung Pelepas	2	325.408	325.408	325.408	325.408	162.704	162.704	162.704	162.704	120.893	172.944	90.2319	292.867	60.4466	86.4722	45.1159	146.433	1245.2	1245.2	1245.2	1171.47	0.371513	0.53147	0.277289	0.9	241.786	292.867	180.464	292.867	120.893	146.433	90.2319	146.433	2490.4	2108.64	2490.4	1171.47	0.743026	0.9	0.554577	0.9	292.867	292.867	270.696	292.867	146.433	146.433
		Kuching	3	488.112	488.112	488.112	488.112	162.704	162.704	162.704	162.704	120.893	172.944	90.2319	311.3	40.2977	57.6481	30.0773	103.767	1245.2	1245.2	1245.2	1245.2	0.247675	0.354313	0.184859	0.637764	241.786	345.889	180.464	439.3	80.5955	115.296	60.1546	146.433	2490.4	2490.4	2490.4	1757.2	0.495351	0.708627	0.369718	0.9	362.68	439.3	270.696	439.3	120.893	146.433
		Shantou	6	976.223	976.223	976.223	976.223	162.704	162.704	162.704	162.704	120.893	172.944	90.2319	311.3	20.1489	28.8241	15.0386	51.8833	1245.2	1245.2	1245.2	1245.2	0.123838	0.177157	0.0924296	0.318882	241.786	345.889	180.464	622.6	40.2977	57.6481	30.0773	103.767	2490.4	2490.4	2490.4	2490.4	0.247675	0.354313	0.184859	0.637764	362.68	518.833	270.696	878.601	60.4466	86.4722
		Total/voyage	35	5694.64	5694.64	5694.64	5694.64	162.704	162.704	162.704	162.704	1208.93	1676.42	902.319	2746.4									0.212293	0.294386	0.158451	0.482279	2227.16	2953.93	1736.58	4210.74									0.391098	0.518722	0.30495	0.739421	3054.68	3832.54	2458.43	4887.6
		IA8	Transportation days per segment (days)	MEA	PZ	NE-2	DES	MEA	PZ	NE-2	DES	MEA	PZ	NE-2	DES	MEA	PZ	NE-2	DES	MEA	PZ	NE-2	DES	MEA	PZ	NE-2	DES	MEA	PZ	NE-2	DES	MEA	PZ	NE-2	DES	MEA	PZ	NE-2	DES	MEA	PZ	NE-2	DES	MEA	PZ	NE-2	DES	MEA	PZ
		Inchon	-	0	0	0	0	0	0	0	0	0	0	0	0	0	0	0	0	0	0	0	0	0	0	0	0	0	0	0	0	0	0	0	0	0	0	0	0	0	0	0	0	0	0	0	0	0	0
		Dalian	2	1155.52	1155.52	1155.52	1155.52	577.761	577.761	577.761	577.761	364.553	521.514	272.094	938.725	182.277	260.757	136.047	469.363	3754.9	3754.9	3754.9	3754.9	0.315488	0.451323	0.235473	0.812382	729.107	1039.97	544.188	1039.97	364.553	519.985	272.094	519.985	7509.8	7487.78	7509.8	4159.88	0.630977	0.9	0.470946	0.9	1039.97	1039.97	816.283	1039.97	519.985	519.985
		Xingang	2	1155.52	1155.52	1155.52	1155.52	577.761	577.761	577.761	577.761	364.553	521.514	272.094	938.725	182.277	260.757	136.047	469.363	3754.9	3754.9	3754.9	3754.9	0.315488	0.451323	0.235473	0.812382	729.107	1039.97	544.188	1039.97	364.553	519.985	272.094	519.985	7509.8	7487.78	7509.8	4159.88	0.630977	0.9	0.470946	0.9	1039.97	1039.97	816.283	1039.97	519.985	519.985
		Qingdao	4	2311.04	2311.04	2311.04	2311.04	577.761	577.761	577.761	577.761	364.553	521.514	272.094	938.725	91.1383	130.378	68.0236	234.681	3754.9	3754.9	3754.9	3754.9	0.157744	0.225662	0.117737	0.406191	729.107	1043.03	544.188	1877.45	182.277	260.757	136.047	469.363	7509.8	7509.8	7509.8	7509.8	0.315488	0.451323	0.235473	0.812382	1093.66	1564.54	816.283	2079.94	273.415	391.135
		Lianyungang	1	577.761	577.761	577.761	577.761	577.761	577.761	577.761	577.761	364.553	519.985	272.094	519.985	364.553	519.985	272.094	519.985	3754.9	3743.89	3754.9	2079.94	0.630977	0.9	0.470946	0.9	519.985	519.985	519.985	519.985	519.985	519.985	519.985	519.985	5355.84	3743.89	7175.79	2079.94	0.9	0.9	0.9	0.9	519.985	519.985	519.985	519.985	519.985	519.985
		Tanjung Pelepas	9	5199.85	5199.85	5199.85	5199.85	577.761	577.761	577.761	577.761	364.553	521.514	272.094	938.725	40.5059	57.946	30.2327	104.303	3754.9	3754.9	3754.9	3754.9	0.0701085	0.100294	0.0523274	0.180529	729.107	1043.03	544.188	1877.45	81.0119	115.892	60.4654	208.606	7509.8	7509.8	7509.8	7509.8	0.140217	0.200588	0.104655	0.361059	1093.66	1564.54	816.283	2816.17	121.518	173.838
		Singapore	1	577.761	577.761	577.761	577.761	577.761	577.761	577.761	577.761	364.553	519.985	272.094	519.985	364.553	519.985	272.094	519.985	3754.9	3743.89	3754.9	2079.94	0.630977	0.9	0.470946	0.9	519.985	519.985	519.985	519.985	519.985	519.985	519.985	519.985	5355.84	3743.89	7175.79	2079.94	0.9	0.9	0.9	0.9	519.985	519.985	519.985	519.985	519.985	519.985
		Jakarta	2	1155.52	1155.52	1155.52	1155.52	577.761	577.761	577.761	577.761	364.553	521.514	272.094	938.725	182.277	260.757	136.047	469.363	3754.9	3754.9	3754.9	3754.9	0.315488	0.451323	0.235473	0.812382	729.107	1039.97	544.188	1039.97	364.553	519.985	272.094	519.985	7509.8	7487.78	7509.8	4159.88	0.630977	0.9	0.470946	0.9	1039.97	1039.97	816.283	1039.97	519.985	519.985
		Surabaya	3	1733.28	1733.28	1733.28	1733.28	577.761	577.761	577.761	577.761	364.553	521.514	272.094	938.725	121.518	173.838	90.6981	312.908	3754.9	3754.9	3754.9	3754.9	0.210326	0.300882	0.156982	0.541588	729.107	1043.03	544.188	1559.95	243.036	347.676	181.396	519.985	7509.8	7509.8	7509.8	6239.81	0.420651	0.601765	0.313964	0.9	1093.66	1559.95	816.283	1559.95	364.553	519.985
		Jakarta	3	1733.28	1733.28	1733.28	1733.28	577.761	577.761	577.761	577.761	364.553	521.514	272.094	938.725	121.518	173.838	90.6981	312.908	3754.9	3754.9	3754.9	3754.9	0.210326	0.300882	0.156982	0.541588	729.107	1043.03	544.188	1559.95	243.036	347.676	181.396	519.985	7509.8	7509.8	7509.8	6239.81	0.420651	0.601765	0.313964	0.9	1093.66	1559.95	816.283	1559.95	364.553	519.985
		Tanjung Pelepas	3	1733.28	1733.28	1733.28	1733.28	577.761	577.761	577.761	577.761	364.553	521.514	272.094	938.725	121.518	173.838	90.6981	312.908	3754.9	3754.9	3754.9	3754.9	0.210326	0.300882	0.156982	0.541588	729.107	1043.03	544.188	1559.95	243.036	347.676	181.396	519.985	7509.8	7509.8	7509.8	6239.81	0.420651	0.601765	0.313964	0.9	1093.66	1559.95	816.283	1559.95	364.553	519.985
		Singapore	1	577.761	577.761	577.761	577.761	577.761	577.761	577.761	577.761	364.553	519.985	272.094	519.985	364.553	519.985	272.094	519.985	3754.9	3743.89	3754.9	2079.94	0.630977	0.9	0.470946	0.9	519.985	519.985	519.985	519.985	519.985	519.985	519.985	519.985	5355.84	3743.89	7175.79	2079.94	0.9	0.9	0.9	0.9	519.985	519.985	519.985	519.985	519.985	519.985
		Shekou	5	2888.8	2888.8	2888.8	2888.8	577.761	577.761	577.761	577.761	364.553	521.514	272.094	938.725	72.9107	104.303	54.4188	187.745	3754.9	3754.9	3754.9	3754.9	0.126195	0.180529	0.0941892	0.324953	729.107	1043.03	544.188	1877.45	145.821	208.606	108.838	375.49	7509.8	7509.8	7509.8	7509.8	0.252391	0.361059	0.188378	0.649906	1093.66	1564.54	816.283	2599.92	218.732	312.908
		Nansha New Port	1	577.761	577.761	577.761	577.761	577.761	577.761	577.761	577.761	364.553	519.985	272.094	519.985	364.553	519.985	272.094	519.985	3754.9	3743.89	3754.9	2079.94	0.630977	0.9	0.470946	0.9	519.985	519.985	519.985	519.985	519.985	519.985	519.985	519.985	5355.84	3743.89	7175.79	2079.94	0.9	0.9	0.9	0.9	519.985	519.985	519.985	519.985	519.985	519.985
		Hong Kong	0	0	0	0	0	0	0	0	0	0	0	0	0	0	0	0	0	0	0	0	0	0	0	0	0	0	0	0	0	0	0	0	0	0	0	0	0	0	0	0	0	0	0	0	0	0	0
		Inchon	5	2888.8	2888.8	2888.8	2888.8	577.761	577.761	577.761	577.761	364.553	521.514	272.094	938.725	72.9107	104.303	54.4188	187.745	3754.9	3754.9	3754.9	3754.9	0.126195	0.180529	0.0941892	0.324953	729.107	1043.03	544.188	1877.45	145.821	208.606	108.838	375.49	7509.8	7509.8	7509.8	7509.8	0.252391	0.361059	0.188378	0.649906	1093.66	1564.54	816.283	2599.92	218.732	312.908
		Total/voyage	42	24265.9	24265.9	24265.9	24265.9	577.761	577.761	577.761	577.761	5103.75	7295.08	3809.32	11467.2									0.210326	0.30063	0.156982	0.472563	9371.01	12501	7521.82	17389.5									0.386179	0.515168	0.309974	0.716622	12855.5	16137.9	10242.8	19975.7
		ME Eastbound	Transportation days per segment (days)	MEA	PZ	NE-2	DES	MEA	PZ	NE-2	DES	MEA	PZ	NE-2	DES	MEA	PZ	NE-2	DES	MEA	PZ	NE-2	DES	MEA	PZ	NE-2	DES	MEA	PZ	NE-2	DES	MEA	PZ	NE-2	DES	MEA	PZ	NE-2	DES	MEA	PZ	NE-2	DES	MEA	PZ	NE-2	DES	MEA	PZ
		Mombasa	-	0	0	0	0	0	0	0	0	0	0	0	0	0	0	0	0	0	0	0	0	0	0	0	0	0	0	0	0	0	0	0	0	0	0	0	0	0	0	0	0	0	0	0	0	0	0
		Tanjung Pelepas	12	4439.14	4439.14	4439.14	4439.14	369.929	369.929	369.929	369.929	233.019	333.347	173.92	600.025	19.4183	27.7789	14.4934	50.0021	2400.1	2400.1	2400.1	2400.1	0.052492	0.0750927	0.0391788	0.135167	466.039	666.694	347.841	1200.05	38.8366	55.5579	28.9867	100.004	4800.2	4800.2	4800.2	4800.2	0.104984	0.150185	0.0783576	0.270334	699.058	1000.04	521.761	1800.08	58.2549	83.3368
		Singapore	1	369.929	369.929	369.929	369.929	369.929	369.929	369.929	369.929	233.019	332.936	173.92	332.936	233.019	332.936	173.92	332.936	2400.1	2397.14	2400.1	1331.74	0.629904	0.9	0.470145	0.9	332.936	332.936	332.936	332.936	332.936	332.936	332.936	332.936	3429.24	2397.14	4594.51	1331.74	0.9	0.9	0.9	0.9	332.936	332.936	332.936	332.936	332.936	332.936
		Shanghai	10	3699.29	3699.29	3699.29	3699.29	369.929	369.929	369.929	369.929	233.019	333.347	173.92	600.025	23.3019	33.3347	17.392	60.0025	2400.1	2400.1	2400.1	2400.1	0.0629904	0.0901112	0.0470145	0.1622	466.039	666.694	347.841	1200.05	46.6039	66.6694	34.7841	120.005	4800.2	4800.2	4800.2	4800.2	0.125981	0.180222	0.0940291	0.3244	699.058	1000.04	521.761	1800.08	69.9058	100.004
		Ningbo	1	369.929	369.929	369.929	369.929	369.929	369.929	369.929	369.929	233.019	332.936	173.92	332.936	233.019	332.936	173.92	332.936	2400.1	2397.14	2400.1	1331.74	0.629904	0.9	0.470145	0.9	332.936	332.936	332.936	332.936	332.936	332.936	332.936	332.936	3429.24	2397.14	4594.51	1331.74	0.9	0.9	0.9	0.9	332.936	332.936	332.936	332.936	332.936	332.936
		Nansha New Port	5	1849.64	1849.64	1849.64	1849.64	369.929	369.929	369.929	369.929	233.019	333.347	173.92	600.025	46.6039	66.6694	34.7841	120.005	2400.1	2400.1	2400.1	2400.1	0.125981	0.180222	0.0940291	0.3244	466.039	666.694	347.841	1200.05	93.2078	133.339	69.5681	240.01	4800.2	4800.2	4800.2	4800.2	0.251961	0.360445	0.188058	0.648801	699.058	1000.04	521.761	1664.68	139.812	200.008
		Total/voyage	29	10727.9	10727.9	10727.9	10727.9	369.929	369.929	369.929	369.929	1165.1	1665.91	869.601	2465.95									0.108604	0.155287	0.0810596	0.229862	2063.99	2665.96	1709.39	4266.02									0.192394	0.248506	0.15934	0.397656	2763.05	3666	2231.15	5930.7
		ME Westbound	Transportation days per segment (days)	MEA	PZ	NE-2	DES	MEA	PZ	NE-2	DES	MEA	PZ	NE-2	DES	MEA	PZ	NE-2	DES	MEA	PZ	NE-2	DES	MEA	PZ	NE-2	DES	MEA	PZ	NE-2	DES	MEA	PZ	NE-2	DES	MEA	PZ	NE-2	DES	MEA	PZ	NE-2	DES	MEA	PZ	NE-2	DES	MEA	PZ
		Shanghai	-	0	0	0	0	0	0	0	0	0	0	0	0	0	0	0	0	0	0	0	0	0	0	0	0	0	0	0	0	0	0	0	0	0	0	0	0	0	0	0	0	0	0	0	0	0	0
		Ningbo	1	369.929	369.929	369.929	369.929	369.929	369.929	369.929	369.929	233.019	332.936	173.92	332.936	233.019	332.936	173.92	332.936	2400.1	2397.14	2400.1	1331.74	0.629904	0.9	0.470145	0.9	332.936	332.936	332.936	332.936	332.936	332.936	332.936	332.936	3429.24	2397.14	4594.51	1331.74	0.9	0.9	0.9	0.9	332.936	332.936	332.936	332.936	332.936	332.936
		Nansha New Port	4	1479.71	1479.71	1479.71	1479.71	369.929	369.929	369.929	369.929	233.019	333.347	173.92	600.025	58.2549	83.3368	43.4801	150.006	2400.1	2400.1	2400.1	2400.1	0.157476	0.225278	0.117536	0.4055	466.039	666.694	347.841	1200.05	116.51	166.674	86.9601	300.012	4800.2	4800.2	4800.2	4800.2	0.314952	0.450556	0.235073	0.811001	699.058	1000.04	521.761	1331.74	174.765	250.01
		Singapore	5	1849.64	1849.64	1849.64	1849.64	369.929	369.929	369.929	369.929	233.019	333.347	173.92	600.025	46.6039	66.6694	34.7841	120.005	2400.1	2400.1	2400.1	2400.1	0.125981	0.180222	0.0940291	0.3244	466.039	666.694	347.841	1200.05	93.2078	133.339	69.5681	240.01	4800.2	4800.2	4800.2	4800.2	0.251961	0.360445	0.188058	0.648801	699.058	1000.04	521.761	1664.68	139.812	200.008
		Tanjung Pelepas	1	369.929	369.929	369.929	369.929	369.929	369.929	369.929	369.929	233.019	332.936	173.92	332.936	233.019	332.936	173.92	332.936	2400.1	2397.14	2400.1	1331.74	0.629904	0.9	0.470145	0.9	332.936	332.936	332.936	332.936	332.936	332.936	332.936	332.936	3429.24	2397.14	4594.51	1331.74	0.9	0.9	0.9	0.9	332.936	332.936	332.936	332.936	332.936	332.936
		Mombasa	11	4069.22	4069.22	4069.22	4069.22	369.929	369.929	369.929	369.929	233.019	333.347	173.92	600.025	21.1836	30.3043	15.8109	54.5477	2400.1	2400.1	2400.1	2400.1	0.057264	0.0819193	0.0427405	0.147455	466.039	666.694	347.841	1200.05	42.3672	60.6086	31.6219	109.095	4800.2	4800.2	4800.2	4800.2	0.114528	0.163839	0.085481	0.294909	699.058	1000.04	521.761	1800.08	63.5508	90.9129
		Total/voyage	22	8138.43	8138.43	8138.43	8138.43	369.929	369.929	369.929	369.929	1165.1	1665.91	869.601	2465.95									0.14316	0.204697	0.106851	0.303	2063.99	2665.96	1709.39	4266.02									0.25361	0.327576	0.21004	0.524182	2763.05	3666	2231.15	5462.37
		IA1	Transportation days per segment (days)	MEA	PZ	NE-2	DES	MEA	PZ	NE-2	DES	MEA	PZ	NE-2	DES	MEA	PZ	NE-2	DES	MEA	PZ	NE-2	DES	MEA	PZ	NE-2	DES	MEA	PZ	NE-2	DES	MEA	PZ	NE-2	DES	MEA	PZ	NE-2	DES	MEA	PZ	NE-2	DES	MEA	PZ	NE-2	DES	MEA	PZ
		Qingdao	-	0	0	0	0	0	0	0	0	0	0	0	0	0	0	0	0	0	0	0	0	0	0	0	0	0	0	0	0	0	0	0	0	0	0	0	0	0	0	0	0	0	0	0	0	0	0
		Shanghai	3	1109.79	1109.79	1109.79	1109.79	369.929	369.929	369.929	369.929	246.388	352.472	183.899	634.45	82.1294	117.491	61.2995	211.483	2537.8	2537.8	2537.8	2537.8	0.222014	0.317604	0.165706	0.571687	492.777	704.944	367.797	998.808	164.259	234.981	122.599	332.936	5075.6	5075.6	5075.6	3995.23	0.444029	0.635207	0.331413	0.9	739.165	998.808	551.696	998.808	246.388	332.936
		Ningbo	2	739.857	739.857	739.857	739.857	369.929	369.929	369.929	369.929	246.388	352.472	183.899	634.45	123.194	176.236	91.9493	317.225	2537.8	2537.8	2537.8	2537.8	0.333021	0.476406	0.248559	0.85753	492.777	665.872	367.797	665.872	246.388	332.936	183.899	332.936	5075.6	4794.28	5075.6	2663.49	0.666043	0.9	0.497119	0.9	665.872	665.872	551.696	665.872	332.936	332.936
		Nansha New Port	4	1479.71	1479.71	1479.71	1479.71	369.929	369.929	369.929	369.929	246.388	352.472	183.899	634.45	61.5971	88.1181	45.9746	158.613	2537.8	2537.8	2537.8	2537.8	0.166511	0.238203	0.12428	0.428765	492.777	704.944	367.797	1268.9	123.194	176.236	91.9493	317.225	5075.6	5075.6	5075.6	5075.6	0.333021	0.476406	0.248559	0.85753	739.165	1057.42	551.696	1331.74	184.791	264.354
		Tanjung Pelepas	5	1849.64	1849.64	1849.64	1849.64	369.929	369.929	369.929	369.929	246.388	352.472	183.899	634.45	49.2777	70.4944	36.7797	126.89	2537.8	2537.8	2537.8	2537.8	0.133209	0.190562	0.0994238	0.343012	492.777	704.944	367.797	1268.9	98.5553	140.989	73.5594	253.78	5075.6	5075.6	5075.6	5075.6	0.266417	0.381124	0.198848	0.686024	739.165	1057.42	551.696	1664.68	147.833	211.483
		Jakarta	3	1109.79	1109.79	1109.79	1109.79	369.929	369.929	369.929	369.929	246.388	352.472	183.899	634.45	82.1294	117.491	61.2995	211.483	2537.8	2537.8	2537.8	2537.8	0.222014	0.317604	0.165706	0.571687	492.777	704.944	367.797	998.808	164.259	234.981	122.599	332.936	5075.6	5075.6	5075.6	3995.23	0.444029	0.635207	0.331413	0.9	739.165	998.808	551.696	998.808	246.388	332.936
		Terminal Petikemas Semarang	3	1109.79	1109.79	1109.79	1109.79	369.929	369.929	369.929	369.929	246.388	352.472	183.899	634.45	82.1294	117.491	61.2995	211.483	2537.8	2537.8	2537.8	2537.8	0.222014	0.317604	0.165706	0.571687	492.777	704.944	367.797	998.808	164.259	234.981	122.599	332.936	5075.6	5075.6	5075.6	3995.23	0.444029	0.635207	0.331413	0.9	739.165	998.808	551.696	998.808	246.388	332.936
		PT. IPC Panjang	3	1109.79	1109.79	1109.79	1109.79	369.929	369.929	369.929	369.929	246.388	352.472	183.899	634.45	82.1294	117.491	61.2995	211.483	2537.8	2537.8	2537.8	2537.8	0.222014	0.317604	0.165706	0.571687	492.777	704.944	367.797	998.808	164.259	234.981	122.599	332.936	5075.6	5075.6	5075.6	3995.23	0.444029	0.635207	0.331413	0.9	739.165	998.808	551.696	998.808	246.388	332.936
		Jakarta	2	739.857	739.857	739.857	739.857	369.929	369.929	369.929	369.929	246.388	352.472	183.899	634.45	123.194	176.236	91.9493	317.225	2537.8	2537.8	2537.8	2537.8	0.333021	0.476406	0.248559	0.85753	492.777	665.872	367.797	665.872	246.388	332.936	183.899	332.936	5075.6	4794.28	5075.6	2663.49	0.666043	0.9	0.497119	0.9	665.872	665.872	551.696	665.872	332.936	332.936
		Tanjung Pelepas	2	739.857	739.857	739.857	739.857	369.929	369.929	369.929	369.929	246.388	352.472	183.899	634.45	123.194	176.236	91.9493	317.225	2537.8	2537.8	2537.8	2537.8	0.333021	0.476406	0.248559	0.85753	492.777	665.872	367.797	665.872	246.388	332.936	183.899	332.936	5075.6	4794.28	5075.6	2663.49	0.666043	0.9	0.497119	0.9	665.872	665.872	551.696	665.872	332.936	332.936
		Singapore	2	739.857	739.857	739.857	739.857	369.929	369.929	369.929	369.929	246.388	352.472	183.899	634.45	123.194	176.236	91.9493	317.225	2537.8	2537.8	2537.8	2537.8	0.333021	0.476406	0.248559	0.85753	492.777	665.872	367.797	665.872	246.388	332.936	183.899	332.936	5075.6	4794.28	5075.6	2663.49	0.666043	0.9	0.497119	0.9	665.872	665.872	551.696	665.872	332.936	332.936
		Batangas	4	1479.71	1479.71	1479.71	1479.71	369.929	369.929	369.929	369.929	246.388	352.472	183.899	634.45	61.5971	88.1181	45.9746	158.613	2537.8	2537.8	2537.8	2537.8	0.166511	0.238203	0.12428	0.428765	492.777	704.944	367.797	1268.9	123.194	176.236	91.9493	317.225	5075.6	5075.6	5075.6	5075.6	0.333021	0.476406	0.248559	0.85753	739.165	1057.42	551.696	1331.74	184.791	264.354
		Manila	2	739.857	739.857	739.857	739.857	369.929	369.929	369.929	369.929	246.388	352.472	183.899	634.45	123.194	176.236	91.9493	317.225	2537.8	2537.8	2537.8	2537.8	0.333021	0.476406	0.248559	0.85753	492.777	665.872	367.797	665.872	246.388	332.936	183.899	332.936	5075.6	4794.28	5075.6	2663.49	0.666043	0.9	0.497119	0.9	665.872	665.872	551.696	665.872	332.936	332.936
		Subic	1	369.929	369.929	369.929	369.929	369.929	369.929	369.929	369.929	246.388	332.936	183.899	332.936	246.388	332.936	183.899	332.936	2537.8	2397.14	2537.8	1331.74	0.666043	0.9	0.497119	0.9	332.936	332.936	332.936	332.936	332.936	332.936	332.936	332.936	3429.24	2397.14	4594.51	1331.74	0.9	0.9	0.9	0.9	332.936	332.936	332.936	332.936	332.936	332.936
		Qingdao	6	2219.57	2219.57	2219.57	2219.57	369.929	369.929	369.929	369.929	246.388	352.472	183.899	634.45	41.0647	58.7454	30.6498	105.742	2537.8	2537.8	2537.8	2537.8	0.111007	0.158802	0.0828532	0.285843	492.777	704.944	367.797	1268.9	82.1294	117.491	61.2995	211.483	5075.6	5075.6	5075.6	5075.6	0.222014	0.317604	0.165706	0.571687	739.165	1057.42	551.696	1903.35	123.194	176.236
		Total/voyage	42	15537	15537	15537	15537	369.929	369.929	369.929	369.929	3449.44	4915.07	2574.58	8580.79									0.222014	0.316346	0.165706	0.552281	6739.03	9301.85	5114.3	12733.1									0.433741	0.59869	0.329169	0.819535	9575.61	11887.2	7504.98	13889
		IA88	Transportation days per segment (days)	MEA	PZ	NE-2	DES	MEA	PZ	NE-2	DES	MEA	PZ	NE-2	DES	MEA	PZ	NE-2	DES	MEA	PZ	NE-2	DES	MEA	PZ	NE-2	DES	MEA	PZ	NE-2	DES	MEA	PZ	NE-2	DES	MEA	PZ	NE-2	DES	MEA	PZ	NE-2	DES	MEA	PZ	NE-2	DES	MEA	PZ
		Yokohama	-	0	0	0	0	0	0	0	0	0	0	0	0	0	0	0	0	0	0	0	0	0	0	0	0	0	0	0	0	0	0	0	0	0	0	0	0	0	0	0	0	0	0	0	0	0	0
		Nagoya	1	136.598	136.598	136.598	136.598	136.598	136.598	136.598	136.598	75.165	107.528	56.1014	122.939	75.165	107.528	56.1014	122.939	774.2	774.2	774.2	491.754	0.550263	0.787182	0.410704	0.9	122.939	122.939	112.203	122.939	122.939	122.939	112.203	122.939	1266.27	885.158	1548.4	491.754	0.9	0.9	0.821407	0.9	122.939	122.939	122.939	122.939	122.939	122.939
		Osaka	1	136.598	136.598	136.598	136.598	136.598	136.598	136.598	136.598	75.165	107.528	56.1014	122.939	75.165	107.528	56.1014	122.939	774.2	774.2	774.2	491.754	0.550263	0.787182	0.410704	0.9	122.939	122.939	112.203	122.939	122.939	122.939	112.203	122.939	1266.27	885.158	1548.4	491.754	0.9	0.9	0.821407	0.9	122.939	122.939	122.939	122.939	122.939	122.939
		Kobe	1	136.598	136.598	136.598	136.598	136.598	136.598	136.598	136.598	75.165	107.528	56.1014	122.939	75.165	107.528	56.1014	122.939	774.2	774.2	774.2	491.754	0.550263	0.787182	0.410704	0.9	122.939	122.939	112.203	122.939	122.939	122.939	112.203	122.939	1266.27	885.158	1548.4	491.754	0.9	0.9	0.821407	0.9	122.939	122.939	122.939	122.939	122.939	122.939
		Moji	1	136.598	136.598	136.598	136.598	136.598	136.598	136.598	136.598	75.165	107.528	56.1014	122.939	75.165	107.528	56.1014	122.939	774.2	774.2	774.2	491.754	0.550263	0.787182	0.410704	0.9	122.939	122.939	112.203	122.939	122.939	122.939	112.203	122.939	1266.27	885.158	1548.4	491.754	0.9	0.9	0.821407	0.9	122.939	122.939	122.939	122.939	122.939	122.939
		Hibiki Nada	1	136.598	136.598	136.598	136.598	136.598	136.598	136.598	136.598	75.165	107.528	56.1014	122.939	75.165	107.528	56.1014	122.939	774.2	774.2	774.2	491.754	0.550263	0.787182	0.410704	0.9	122.939	122.939	112.203	122.939	122.939	122.939	112.203	122.939	1266.27	885.158	1548.4	491.754	0.9	0.9	0.821407	0.9	122.939	122.939	122.939	122.939	122.939	122.939
		Busan	1	136.598	136.598	136.598	136.598	136.598	136.598	136.598	136.598	75.165	107.528	56.1014	122.939	75.165	107.528	56.1014	122.939	774.2	774.2	774.2	491.754	0.550263	0.787182	0.410704	0.9	122.939	122.939	112.203	122.939	122.939	122.939	112.203	122.939	1266.27	885.158	1548.4	491.754	0.9	0.9	0.821407	0.9	122.939	122.939	122.939	122.939	122.939	122.939
		Gwangyang	1	136.598	136.598	136.598	136.598	136.598	136.598	136.598	136.598	75.165	107.528	56.1014	122.939	75.165	107.528	56.1014	122.939	774.2	774.2	774.2	491.754	0.550263	0.787182	0.410704	0.9	122.939	122.939	112.203	122.939	122.939	122.939	112.203	122.939	1266.27	885.158	1548.4	491.754	0.9	0.9	0.821407	0.9	122.939	122.939	122.939	122.939	122.939	122.939
		Shanghai	3	409.795	409.795	409.795	409.795	136.598	136.598	136.598	136.598	75.165	107.528	56.1014	193.55	25.055	35.8426	18.7005	64.5167	774.2	774.2	774.2	774.2	0.183421	0.262394	0.136901	0.472309	150.33	215.056	112.203	368.816	50.11	71.6852	37.401	122.939	1548.4	1548.4	1548.4	1475.26	0.366842	0.524788	0.273802	0.9	225.495	322.583	168.304	368.816	75.165	107.528
		Ningbo	1	136.598	136.598	136.598	136.598	136.598	136.598	136.598	136.598	75.165	107.528	56.1014	122.939	75.165	107.528	56.1014	122.939	774.2	774.2	774.2	491.754	0.550263	0.787182	0.410704	0.9	122.939	122.939	112.203	122.939	122.939	122.939	112.203	122.939	1266.27	885.158	1548.4	491.754	0.9	0.9	0.821407	0.9	122.939	122.939	122.939	122.939	122.939	122.939
		Ho Chi Minh City (Saigon)	5	682.992	682.992	682.992	682.992	136.598	136.598	136.598	136.598	75.165	107.528	56.1014	193.55	15.033	21.5056	11.2203	38.71	774.2	774.2	774.2	774.2	0.110053	0.157436	0.0821407	0.283385	150.33	215.056	112.203	387.1	30.066	43.0111	22.4406	77.42	1548.4	1548.4	1548.4	1548.4	0.220105	0.314873	0.164281	0.566771	225.495	322.583	168.304	580.65	45.099	64.5167
		Laem Chabang	4	546.394	546.394	546.394	546.394	136.598	136.598	136.598	136.598	75.165	107.528	56.1014	193.55	18.7913	26.8819	14.0254	48.3875	774.2	774.2	774.2	774.2	0.137566	0.196795	0.102676	0.354232	150.33	215.056	112.203	387.1	37.5825	53.7639	28.0507	96.775	1548.4	1548.4	1548.4	1548.4	0.275132	0.393591	0.205352	0.708464	225.495	322.583	168.304	491.754	56.3738	80.6458
		Bangkok	2	273.197	273.197	273.197	273.197	136.598	136.598	136.598	136.598	75.165	107.528	56.1014	193.55	37.5825	53.7639	28.0507	96.775	774.2	774.2	774.2	774.2	0.275132	0.393591	0.205352	0.708464	150.33	215.056	112.203	245.877	75.165	107.528	56.1014	122.939	1548.4	1548.4	1548.4	983.508	0.550263	0.787182	0.410704	0.9	225.495	245.877	168.304	245.877	112.748	122.939
		Laem Chabang	1	136.598	136.598	136.598	136.598	136.598	136.598	136.598	136.598	75.165	107.528	56.1014	122.939	75.165	107.528	56.1014	122.939	774.2	774.2	774.2	491.754	0.550263	0.787182	0.410704	0.9	122.939	122.939	112.203	122.939	122.939	122.939	112.203	122.939	1266.27	885.158	1548.4	491.754	0.9	0.9	0.821407	0.9	122.939	122.939	122.939	122.939	122.939	122.939
		Haiphong	5	682.992	682.992	682.992	682.992	136.598	136.598	136.598	136.598	75.165	107.528	56.1014	193.55	15.033	21.5056	11.2203	38.71	774.2	774.2	774.2	774.2	0.110053	0.157436	0.0821407	0.283385	150.33	215.056	112.203	387.1	30.066	43.0111	22.4406	77.42	1548.4	1548.4	1548.4	1548.4	0.220105	0.314873	0.164281	0.566771	225.495	322.583	168.304	580.65	45.099	64.5167
		Hong Kong	2	273.197	273.197	273.197	273.197	136.598	136.598	136.598	136.598	75.165	107.528	56.1014	193.55	37.5825	53.7639	28.0507	96.775	774.2	774.2	774.2	774.2	0.275132	0.393591	0.205352	0.708464	150.33	215.056	112.203	245.877	75.165	107.528	56.1014	122.939	1548.4	1548.4	1548.4	983.508	0.550263	0.787182	0.410704	0.9	225.495	245.877	168.304	245.877	112.748	122.939
		Nansha New Port	0	0	0	0	0	0	0	0	0	0	0	0	0	0	0	0	0	0	0	0	0	0	0	0	0	0	0	0	0	0	0	0	0	0	0	0	0	0	0	0	0	0	0	0	0	0	0
		Yokohama	5	682.992	682.992	682.992	682.992	136.598	136.598	136.598	136.598	75.165	107.528	56.1014	193.55	15.033	21.5056	11.2203	38.71	774.2	774.2	774.2	774.2	0.110053	0.157436	0.0821407	0.283385	150.33	215.056	112.203	387.1	30.066	43.0111	22.4406	77.42	1548.4	1548.4	1548.4	1548.4	0.220105	0.314873	0.164281	0.566771	225.495	322.583	168.304	580.65	45.099	64.5167
		Total/voyage	35	4780.94	4780.94	4780.94	4780.94	136.598	136.598	136.598	136.598	1202.64	1720.44	897.623	2461.3									0.251549	0.359855	0.18775	0.514814	2158.76	2611.84	1795.25	3515.42									0.451534	0.546301	0.3755	0.735298	2684.91	3211.12	2284.58	4200.72
		PH5	Transportation days per segment (days)	MEA	PZ	NE-2	DES	MEA	PZ	NE-2	DES	MEA	PZ	NE-2	DES	MEA	PZ	NE-2	DES	MEA	PZ	NE-2	DES	MEA	PZ	NE-2	DES	MEA	PZ	NE-2	DES	MEA	PZ	NE-2	DES	MEA	PZ	NE-2	DES	MEA	PZ	NE-2	DES	MEA	PZ	NE-2	DES	MEA	PZ
		Busan	-	0	0	0	0	0	0	0	0	0	0	0	0	0	0	0	0	0	0	0	0	0	0	0	0	0	0	0	0	0	0	0	0	0	0	0	0	0	0	0	0	0	0	0	0	0	0
		Dalian	5	1095.82	1095.82	1095.82	1095.82	219.165	219.165	219.165	219.165	126.175	180.5	94.1739	324.9	25.235	36.1	18.8348	64.98	1299.6	1299.6	1299.6	1299.6	0.115142	0.164716	0.085939	0.29649	252.35	361	188.348	649.8	50.4699	72.2	37.6696	129.96	2599.2	2599.2	2599.2	2599.2	0.230283	0.329433	0.171878	0.592979	378.524	541.5	282.522	974.7	75.7049	108.3
		Xingang	1	219.165	219.165	219.165	219.165	219.165	219.165	219.165	219.165	126.175	180.5	94.1739	197.248	126.175	180.5	94.1739	197.248	1299.6	1299.6	1299.6	788.992	0.575708	0.823582	0.429695	0.9	197.248	197.248	188.348	197.248	197.248	197.248	188.348	197.248	2031.66	1420.19	2599.2	788.992	0.9	0.9	0.85939	0.9	197.248	197.248	197.248	197.248	197.248	197.248
		Qingdao	3	657.494	657.494	657.494	657.494	219.165	219.165	219.165	219.165	126.175	180.5	94.1739	324.9	42.0583	60.1667	31.3913	108.3	1299.6	1299.6	1299.6	1299.6	0.191903	0.274527	0.143232	0.494149	252.35	361	188.348	591.744	84.1165	120.333	62.7826	197.248	2599.2	2599.2	2599.2	2366.98	0.383805	0.549055	0.286463	0.9	378.524	541.5	282.522	591.744	126.175	180.5
		Hong Kong	4	876.658	876.658	876.658	876.658	219.165	219.165	219.165	219.165	126.175	180.5	94.1739	324.9	31.5437	45.125	23.5435	81.225	1299.6	1299.6	1299.6	1299.6	0.143927	0.205896	0.107424	0.370612	252.35	361	188.348	649.8	63.0874	90.25	47.087	162.45	2599.2	2599.2	2599.2	2599.2	0.287854	0.411791	0.214848	0.741224	378.524	541.5	282.522	788.992	94.6311	135.375
		Yantian	0	0	0	0	0	0	0	0	0	0	0	0	0	0	0	0	0	0	0	0	0	0	0	0	0	0	0	0	0	0	0	0	0	0	0	0	0	0	0	0	0	0	0	0	0	0	0
		Nansha New Port	1	219.165	219.165	219.165	219.165	219.165	219.165	219.165	219.165	126.175	180.5	94.1739	197.248	126.175	180.5	94.1739	197.248	1299.6	1299.6	1299.6	788.992	0.575708	0.823582	0.429695	0.9	197.248	197.248	188.348	197.248	197.248	197.248	188.348	197.248	2031.66	1420.19	2599.2	788.992	0.9	0.9	0.85939	0.9	197.248	197.248	197.248	197.248	197.248	197.248
		Ho Chi Minh City (Saigon)	4	876.658	876.658	876.658	876.658	219.165	219.165	219.165	219.165	126.175	180.5	94.1739	324.9	31.5437	45.125	23.5435	81.225	1299.6	1299.6	1299.6	1299.6	0.143927	0.205896	0.107424	0.370612	252.35	361	188.348	649.8	63.0874	90.25	47.087	162.45	2599.2	2599.2	2599.2	2599.2	0.287854	0.411791	0.214848	0.741224	378.524	541.5	282.522	788.992	94.6311	135.375
		Laem Chabang	3	657.494	657.494	657.494	657.494	219.165	219.165	219.165	219.165	126.175	180.5	94.1739	324.9	42.0583	60.1667	31.3913	108.3	1299.6	1299.6	1299.6	1299.6	0.191903	0.274527	0.143232	0.494149	252.35	361	188.348	591.744	84.1165	120.333	62.7826	197.248	2599.2	2599.2	2599.2	2366.98	0.383805	0.549055	0.286463	0.9	378.524	541.5	282.522	591.744	126.175	180.5
		Xiamen	6	1314.99	1314.99	1314.99	1314.99	219.165	219.165	219.165	219.165	126.175	180.5	94.1739	324.9	21.0291	30.0833	15.6957	54.15	1299.6	1299.6	1299.6	1299.6	0.0959513	0.137264	0.0716158	0.247075	252.35	361	188.348	649.8	42.0583	60.1667	31.3913	108.3	2599.2	2599.2	2599.2	2599.2	0.191903	0.274527	0.143232	0.494149	378.524	541.5	282.522	974.7	63.0874	90.25
		Shanghai	4	876.658	876.658	876.658	876.658	219.165	219.165	219.165	219.165	126.175	180.5	94.1739	324.9	31.5437	45.125	23.5435	81.225	1299.6	1299.6	1299.6	1299.6	0.143927	0.205896	0.107424	0.370612	252.35	361	188.348	649.8	63.0874	90.25	47.087	162.45	2599.2	2599.2	2599.2	2599.2	0.287854	0.411791	0.214848	0.741224	378.524	541.5	282.522	788.992	94.6311	135.375
		Qingdao	2	438.329	438.329	438.329	438.329	219.165	219.165	219.165	219.165	126.175	180.5	94.1739	324.9	63.0874	90.25	47.087	162.45	1299.6	1299.6	1299.6	1299.6	0.287854	0.411791	0.214848	0.741224	252.35	361	188.348	394.496	126.175	180.5	94.1739	197.248	2599.2	2599.2	2599.2	1577.98	0.575708	0.823582	0.429695	0.9	378.524	394.496	282.522	394.496	189.262	197.248
		Busan	0	0	0	0	0	0	0	0	0	0	0	0	0	0	0	0	0	0	0	0	0	0	0	0	0	0	0	0	0	0	0	0	0	0	0	0	0	0	0	0	0	0	0	0	0	0	0
		Total/voyage	33	7232.43	7232.43	7232.43	7232.43	219.165	219.165	219.165	219.165	7232.43	7232.43	7232.43	7232.43									0.174457	0.24957	0.130211	0.413927	2413.29	3282.5	1883.48	5221.48									0.333677	0.453858	0.260421	0.721954	3422.69	4579.49	2654.67	6288.86
[truncated: 18 more columns]

## Sheet: Supplementary Data 3
Unit penalty (UP) across 357 Maersk routes using the DES-based onshore regeneration scheme ($/tonne CO2)
Routes	10% load limit			20% load limit			30% load limit
	2030	2040	2050	2030	2040	2050	2030	2040	2050
072 Northern Star	118.923	168.257	190.955	134.577	167.748	176.965	143.852	167.447	168.675
FEW 3	127.025	167.776	183.314	140.69	167.212	170.882	145.794	167.001	166.239
FEW 5 Eastbound	121.562	168.15	188.557	131.314	167.822	179.821	139.251	167.555	172.712
FEW 6	123.652	167.921	186.394	139.124	167.287	172.326	144.636	167.061	167.313
FEW 7 Eastbound	112.85	168.379	196.244	123.5	167.958	186.588	129.434	167.723	181.209
AC1 Westbound	128.218	167.747	182.267	138.279	167.34	173.128	143.59	167.126	168.304
AC1 Eastbound	128.628	167.731	181.895	139.052	167.309	172.426	146.012	167.028	166.105
AC2 Eastbound	131.963	167.596	178.866	148.078	166.944	164.228	155.125	166.659	157.827
AC2 Westbound	133.59	167.53	177.388	147.002	166.988	165.206	152.608	166.761	160.113
AC3 Eastbound	131.297	167.646	179.513	142.796	167.19	169.086	146.423	167.046	165.796
AC3 Westbound	130.441	167.723	180.367	137.51	167.453	173.976	141.138	167.314	170.696
AE10 Eastbound	114.388	168.305	194.826	126.577	167.811	183.752	136.423	167.411	174.806
AE10 Westbound	130.441	167.723	180.367	137.51	167.453	173.976	141.138	167.314	170.696
AE11 Eastbound	145.995	166.961	165.996	157.046	166.497	155.927	161.586	166.306	151.791
AE11 Westbound	148.843	166.841	163.401	155.432	166.565	157.398	160.918	166.334	152.399
AE12 Eastbound	143.47	167.168	168.481	156.681	166.645	156.504	162.713	166.406	151.035
AE12 Westbound	145.426	167.09	166.708	154.971	166.713	158.054	160.555	166.492	152.992
AE15 Eastbound	145.084	166.999	166.826	159.221	166.405	153.945	162.571	166.265	150.893
AE15 Westbound	149.382	166.819	162.91	156.744	166.509	156.202	162.571	166.265	150.893
AE5 Eastbound	138.676	167.324	172.766	148.136	166.941	164.173	152.967	166.745	159.785
AE5 Westbound	138.233	167.353	173.191	146.382	167.026	165.794	151.429	166.824	161.213
AE55 Eastbound	143.424	167.069	168.339	161.674	166.302	151.71	162.571	166.265	150.893
AE55 Westbound	130.698	167.613	179.952	138.584	167.285	172.772	144.423	167.041	167.455
AE6 Eastbound	135.184	167.415	175.847	148.287	166.865	163.908	155.036	166.581	157.759
AE6 Westbound	136.099	167.376	175.013	149.335	166.821	162.953	155.037	166.581	157.757
AE7 Eastbound	138.298	167.372	173.171	152.905	166.794	159.927	157.704	166.605	155.576
AE7 Westbound	147.228	167.019	165.074	154.97	166.713	158.055	160.554	166.492	152.992
TP Alaska Eastbound	123.389	168.154	187.04	140.065	167.645	172.197	147.129	167.429	165.91
TP Alaska Westbound	126.038	168.073	184.683	144.799	167.5	167.984	152.745	167.258	160.911
IA3 BKI LOOP	129.285	168.016	181.87	149.435	167.434	163.994	158.469	167.172	155.979
IA3 BTU LOOP	131.368	167.956	180.023	156.379	167.233	157.834	163.338	167.031	151.66
CTI	123.791	167.998	186.419	137.727	167.48	173.845	144.008	167.247	168.178
CTX	120.51	168.277	189.667	138.821	167.753	173.434	157.131	167.23	157.2
Dragon	131.16	167.814	179.934	142.888	167.414	169.419	151.066	167.136	162.087
Safina Eastbound	163.311	167.004	151.632	163.311	167.004	151.632	163.311	167.004	151.632
TP6 Eastbound	137.866	167.496	173.759	149.257	167.08	163.494	160.647	166.664	153.229
TP18 Eastbound	130.02	167.68	180.641	140.48	167.259	171.143	144.134	167.112	167.826
TP88 Eastbound	125.15	167.892	185.092	133.31	167.569	177.694	138.234	167.375	173.229
TP17 Eastbound	131.41	167.636	179.401	136.97	167.415	174.356	140.912	167.257	170.78
TP16 Eastbound	126.906	167.797	183.453	138.187	167.339	173.203	141.754	167.194	169.962
TP8 Eastbound	140.149	167.413	171.702	153.853	166.912	159.352	162.888	166.582	151.21
FI3 Eastbound	155.92	166.977	157.747	163.041	166.735	151.363	163.041	166.735	151.363
TP2 Eastbound	132.74	167.52	178.078	142.279	167.12	169.388	151.819	166.72	160.697
TPX Eastbound	121.035	168.225	189.136	137.235	167.731	174.716	147.979	167.403	165.154
TP12 Eastbound	117.307	168.343	192.461	127.339	168.04	183.536	131.018	167.929	180.264
TP1 Eastbound	143.076	167.184	168.84	153.994	166.752	158.941	160.441	166.497	153.097
TP10 Eastbound	135.585	167.479	175.631	142.592	167.202	169.278	149.599	166.925	162.924
Mashariki Express Eastbound	118.4	168.21	191.304	130.554	167.767	180.354	140.67	167.398	171.24
Sakura Express	132.594	167.8	178.714	151.593	167.175	161.72	159.844	166.904	154.339
Mashariki Expresss Westbound	125.97	167.934	184.484	141.809	167.356	170.213	149.719	167.068	163.086
FI3 Westbound	154.296	167.269	159.638	163.311	167.004	151.632	163.311	167.004	151.632
HP2	156.358	167.311	157.994	163.423	167.117	151.745	163.423	167.117	151.745
IA1	140.478	167.405	171.412	155.256	166.866	158.098	161.802	166.628	152.2
IA10	143.589	167.22	168.479	160.747	166.565	152.966	162.794	166.487	151.115
IA11	117.895	168.351	191.986	133.589	167.903	178.072	149.284	167.454	164.157
IA16	128.776	168.033	182.325	155.352	167.265	158.75	163.341	167.035	151.663
IA28	125.373	168.102	185.291	145.771	167.488	167.15	157.211	167.144	156.976
IA36	128.441	168.045	182.628	145.946	167.542	167.103	159.032	167.166	155.497
IA5	135.905	167.772	175.9	154.438	167.206	159.404	159.704	167.046	154.717
IA7	136.415	167.765	175.463	154.604	167.215	159.282	161.71	167	152.96
IA8	136.031	167.452	175.208	152.897	166.78	159.907	158.5	166.557	154.824
IA86	132.503	167.817	178.82	153.513	167.135	160.045	159.786	166.932	154.439
IA88	139.552	167.719	172.762	154.837	167.277	159.202	163.338	167.031	151.66
IA9	127.719	168.066	183.268	146.389	167.529	166.71	153.197	167.333	160.672
Jstar 0CE	133.243	167.81	178.191	146.24	167.396	166.59	153.019	167.18	160.539
NEOASAS-X4A	125.093	167.927	185.203	138.001	167.434	173.533	142.876	167.248	169.125
Triple star Northbound	126.312	168.007	184.332	142.37	167.478	169.97	147.045	167.325	165.787
NV2	139.65	167.83	172.883	160.512	167.29	154.491	163.518	167.212	151.84
PH1	149.619	167.496	163.955	159.038	167.237	155.624	163.423	167.117	151.745
PH3	137.648	167.658	174.237	152.746	167.171	160.751	160.156	166.932	154.132
PH5	138.259	167.629	173.674	156.33	167.042	157.524	160.575	166.904	153.73
PH6	140.053	167.569	172.069	156.334	167.04	157.518	163.092	166.821	151.478
Safari Westbound	136.201	167.639	175.41	153.128	167.061	160.231	163.029	166.723	151.351
Safari	125.966	167.988	184.587	145.951	167.306	166.666	156.857	166.934	156.886
Safina Westbound	139.788	167.562	172.276	152.634	167.139	160.785	162.626	166.81	151.847
SE8	134.246	167.822	177.377	153.419	167.238	160.311	162.494	166.961	152.234
SH1	129.939	167.961	181.224	147.885	167.419	165.259	154.862	167.208	159.052
SH2	134.105	167.835	177.518	152.908	167.267	160.791	160.014	167.052	154.469
SH3	124.856	168.145	185.8	140.136	167.703	172.244	151.734	167.367	161.955
SK1	139.054	167.916	173.538	163.633	167.327	151.955	163.633	167.327	151.955
SK2	139.054	167.916	173.538	163.633	167.327	151.955	163.633	167.327	151.955
TJ1	143.319	167.756	169.687	163.549	167.243	151.871	163.549	167.243	151.871
TP1 Westbound	133.884	167.547	177.174	140.364	167.291	171.299	145.114	167.103	166.992
TP10 Westbound	126.676	167.832	183.709	134.822	167.51	176.323	140.077	167.302	171.558
TP12 westbound	133.959	167.544	177.105	142.573	167.203	169.295	146.911	167.031	165.362
TP16 Westbound	124.118	167.91	185.986	131.738	167.601	179.062	135.548	167.446	175.6
TP17 Westbound	123.803	167.909	186.246	130.833	167.619	179.85	133.615	167.504	177.318
TP18 Westbound	124.565	167.9	185.594	135.291	167.468	175.855	138.283	167.348	173.138
TP2 Westbound	124.528	167.864	185.559	135.247	167.415	175.794	145.452	166.987	166.498
TP6 Westbound	133.442	167.658	177.746	147.926	167.129	164.694	155.227	166.862	158.114
TP8 Westbound	137.99	167.492	173.647	147.483	167.145	165.093	156.975	166.798	156.539
TP88 Westbound	124.933	167.901	185.288	133.772	167.551	177.275	140.062	167.302	171.572
TPX Westbound	124.903	168.107	185.693	142.524	167.57	170.009	150.704	167.32	162.728
071 - Southern Star	122.88	168.011	187.203	137.801	167.442	173.713	144.694	167.179	167.481
Greater Australia Connect - 080	122.255	167.973	187.654	137.378	167.349	173.895	148.705	166.881	163.59
Western Australia Connect 083	123.589	168.13	186.83	139.169	167.642	172.939	154.615	167.158	159.167
Eastern Australia Connect 084	122.886	168.094	187.35	134.472	167.698	176.96	143.367	167.394	168.984
PANZ Surrey/Vancouver Loop	110.736	168.483	198.199	119.267	168.166	190.501	126.227	167.908	184.221
PANZ Seattle Loop	121.247	168.106	188.739	133.976	167.642	177.271	140.597	167.401	171.305
OC1 - Oceania Service Northbound	121.323	168.136	188.731	133.726	167.705	177.594	143.366	167.37	168.939
OC1 - Oceania Service Southbound	111.494	168.458	197.52	120.789	168.115	189.139	128.264	167.84	182.399
K01	140.224	167.645	172.065	155.487	167.181	158.483	163.252	166.945	151.574
Fiji Express	127.329	168.043	183.552	147.685	167.43	165.448	157.687	167.129	156.552
SS1	163.38	167.074	151.702	163.38	167.074	151.702	163.38	167.074	151.702
TH9	141.925	167.651	170.657	163.338	167.031	151.66	163.338	167.031	151.66
FEW 2	123.705	168.078	186.638	135.809	167.671	175.795	140.442	167.515	171.646
Bangladesh Feeder 2 (BAN2)	123.038	167.94	186.942	143.176	167.109	168.621	153.594	166.68	159.142
Bangladesh Feeder 4 Ban4	131.046	167.928	180.239	152.873	167.268	160.822	163.26	166.954	151.582
Arabian Star Eastbound	132.541	167.642	178.468	151.675	166.912	161.168	162.062	166.515	151.777
Arabian Star Westbound	128.919	167.78	181.742	143.071	167.24	168.947	151.651	166.913	161.19
BA4	120.493	168.24	189.614	138.785	167.68	173.329	157.078	167.12	157.043
Chennai Express Westbound	135.454	167.619	175.995	155.703	166.899	157.785	162.948	166.642	151.27
TP11 Eastbound	136.475	167.518	174.959	146.081	167.159	166.287	151.753	166.946	161.167
Mazuri Express Eastbound	110.83	168.52	198.188	116.413	168.338	193.198	121.996	168.157	188.209
M-Express Eastbound	122.409	168.086	187.733	137.323	167.558	174.326	148.489	167.164	164.288
Mazuri Express Westbound	118.152	168.282	191.644	126.856	167.999	183.865	134.832	167.74	176.737
PNG Express	116.524	168.38	193.181	126.741	168.08	184.109	134.889	167.841	176.873
MA1	133.707	167.654	177.517	147.871	167.139	164.758	162.035	166.623	151.998
SV1	131.428	167.87	179.815	146.67	167.385	166.212	161.284	166.921	153.169
TP11 Westbound	120.141	168.129	189.704	125.955	167.911	184.456	131.768	167.694	179.208
D8A Loop 1	144.639	167.676	168.439	163.484	167.177	151.805	163.484	167.177	151.805
D8A Loop 2	143.632	167.703	169.328	163.484	167.177	151.805	163.484	167.177	151.805
D8D Loop 3	154.853	167.406	159.424	163.484	167.177	151.805	163.484	167.177	151.805
OEL Kolkata Singapore Feeder	158.086	167.402	156.719	163.571	167.264	151.893	163.571	167.264	151.893
UHD - UCLA - SOUTHBOUND	127.656	167.829	182.885	140.745	167.329	171.051	150.929	166.941	161.844
49T Adriatic	122.286	168.203	188.051	142.371	167.606	170.203	162.457	167.009	152.354
Z42 Malta Durres Empties	142.339	167.727	170.451	163.468	167.161	151.79	163.468	167.161	151.79
L65 Algerian Link 1	121.314	168.315	189.066	138.843	167.87	173.629	148.4	167.627	165.213
L61 Algerian Link 2	123.862	168.223	186.772	144.212	167.68	168.803	154.498	167.406	159.72
L66 Algerian Link 3	120.031	168.338	190.18	137.862	167.876	174.459	150.846	167.54	163.012
499 WALLENIUS 1	113.003	168.52	196.376	123.805	168.24	186.852	134.608	167.961	177.328
SLC Aegean Sea	140.249	167.338	171.481	153.493	166.829	159.5	162.778	166.472	151.1
CAE Eastbound	121.826	168.106	188.257	134.697	167.651	176.686	144.61	167.3	167.774
CAE Westbound	118.727	168.216	191.042	129.566	167.832	181.299	138.452	167.518	173.31
CLX	116.187	168.254	193.231	126.733	167.842	183.678	134.978	167.519	176.21
COEX	119.267	168.228	190.615	130.762	167.843	180.32	137.527	167.616	174.261
CRX	126.703	168.093	184.164	139.919	167.711	172.44	147.256	167.499	165.932
TA3 Eastbound	131.678	167.634	179.174	145.294	167.096	166.828	149.097	166.945	163.38
TA1 Eastbound	123.756	167.987	186.43	136.95	167.49	174.512	150.144	166.993	162.595
TA2 Eastbound	128.371	167.814	182.261	144.877	167.191	167.352	150.931	166.963	161.884
Eurosal Northbound	146.756	167.14	165.69	155.74	166.805	157.582	162.847	166.54	151.169
Eurosal Southbound	128.462	167.89	182.325	144.229	167.343	168.171	149.484	167.161	163.453
NEO Samba	141.347	167.342	170.572	152.149	166.939	160.823	160.278	166.636	153.487
SLB North Sea	130.158	167.831	180.802	139.959	167.491	172.004	146.172	167.276	166.427
TA1 Westbound	127.016	167.853	183.463	137.202	167.464	174.255	147.128	167.086	165.28
TA2 Westbound	129.69	167.705	180.961	143.213	167.166	168.693	148.714	166.947	163.703
TA3 Westbound	135.834	167.459	175.386	149.018	166.934	163.425	153.178	166.768	159.651
Z05 Turkey-Bulgaria Feeder	158.918	167.35	155.93	163.538	167.232	151.86	163.538	167.232	151.86
44O EIMSKIP2	129.977	168.102	181.451	157.754	167.405	157.002	163.565	167.259	151.887
44Q EIMSKIP THORSHAVN	113.417	168.492	195.979	124.634	168.184	186.058	135.851	167.877	176.137
49U - MCL ADI-RJK	113.417	168.492	195.979	124.634	168.184	186.058	135.851	167.877	176.137
49V - XCL ADRIATIC - PLOCE	141.018	168.001	172.055	163.837	167.531	152.159	163.837	167.531	152.159
X07 WEC PIR - LMS - 1	140.733	167.822	171.965	161.738	167.289	153.466	163.549	167.243	151.871
SLL Adriatic Sea D	132.913	167.915	178.659	158.425	167.18	156.031	163.345	167.039	151.667
Z51 - Z51 UFS PSD - LMS - ASD	133.411	167.992	178.383	154.324	167.45	159.946	162.098	167.249	153.093
N34 UNIFEEDER G17	131.817	168.059	179.836	143.9	167.757	169.204	155.982	167.454	158.571
Z63 Unifeeder G4	163.565	167.259	151.887	163.565	167.259	151.887	163.565	167.259	151.887
L40	163.457	167.151	151.779	163.457	167.151	151.779	163.457	167.151	151.779
L74 Black Sea Link 2	142.148	167.459	170.118	162.162	166.787	152.192	163.063	166.756	151.385
SLZ Mediterranean Sea A	140.229	167.563	171.911	162.162	166.85	152.308	163.125	166.819	151.447
ME6 - Al Maha - Westbound	146.267	167.325	166.437	161.485	166.816	152.81	163.069	166.763	151.391
ME6 - Al Maha - Eastbound	153.486	167.084	159.973	163.069	166.763	151.391	163.069	166.763	151.391
Z50 - GFS INTRA EGYPT PSD ALY ALD	135.385	167.788	176.363	161.547	166.99	153.077	163.244	166.938	151.566
SLH Mediterranean Sea B	123.249	168.073	187.01	138.373	167.551	173.437	147.572	167.234	165.182
Z34 - BENGHAZI EVACUATION	113.235	168.458	196.068	124.27	168.116	186.237	135.305	167.774	176.405
L76 Black Sea Link	129.557	168.074	181.749	151.443	167.493	162.429	162.113	167.21	153.01
Z52 - GFS INTRA EGYPT PSD PSW DAM	121.709	168.238	188.596	141.219	167.676	171.292	151.846	167.37	161.866
SLH Eastbound	151.44	167.234	161.955	163.167	166.861	151.489	163.167	166.861	151.489
ME4 Eastbound	138.49	167.314	172.904	157.978	166.516	155.186	162.632	166.326	150.954
Z59 - UFS EGPSD - LBBUU - TRISK	155.442	167.122	158.412	163.185	166.878	151.507	163.185	166.878	151.507
L38 - EMED-WMED SHUTTLE	127.494	167.979	183.296	149.986	167.249	163.197	160.302	166.915	153.978
Z40 - UFS EXTRA LOADER	141.855	167.804	170.996	163.565	167.259	151.887	163.565	167.259	151.887
L51 Izmir Link	164.271	167.964	152.593	164.271	167.964	152.593	164.271	167.964	152.593
L59 Mersin Link	131.599	167.811	179.563	148.988	167.226	163.986	163.059	166.752	151.381
Z33 UFS NEW LIBYA SETUP	113.235	168.458	196.068	124.27	168.116	186.237	135.305	167.774	176.405
L02 North Europe Feeder link 2	137.956	167.719	174.092	163.26	166.954	151.582	163.26	166.954	151.582
N23 UNIFEEDER LOOP C	145.814	167.634	167.381	163.468	167.161	151.79	163.468	167.161	151.79
SLR Marmara Sea A	142.891	167.461	169.504	158.6	166.944	155.452	163.103	166.796	151.425
N13 BG Feeder	133.171	168.022	178.64	150.704	167.582	163.208	161.806	167.303	153.435
MED CANADA EXPRESS EASTBOUND	120.175	168.186	189.78	133.601	167.727	177.739	144.233	167.363	168.204
MED CANADA EXPRESS WESTBOUND	119.164	168.183	190.618	128.224	167.853	182.456	132.959	167.681	178.191
L75 - WESTMED-EAST MED SHUTTLE	150.843	167.167	162.33	163.063	166.756	151.385	163.063	166.756	151.385
Z10 - UFS ESBCN - FRFSM	142.17	167.586	170.333	159.372	167.063	155.026	163.252	166.945	151.574
SLS Ligurian Sea	157.815	166.933	156.085	163.063	166.756	151.385	163.063	166.756	151.385
49A UNIFEEDER OSLOFJORD 1	124.5	168.234	186.261	146.8	167.668	166.621	163.549	167.243	151.871
49H - UNIFEEDER OSLOFJORD 2	163.565	167.259	151.887	163.565	167.259	151.887	163.565	167.259	151.887
N22 - UNIFEEDER LOOP 2	135.662	167.963	176.453	160.21	167.348	154.85	163.571	167.264	151.893
50I NCL NORWAY FEEDER	148.749	167.572	164.82	163.49	167.183	151.811	163.49	167.183	151.811
ME2 Eastbound	125.403	167.843	184.79	136.522	167.384	174.674	141.075	167.196	170.531
ME7 Eastbound	121.711	168.089	188.321	136.017	167.568	175.432	142.544	167.33	169.552
N38 UNIFEEDER LOOP F	145.44	167.68	167.778	163.518	167.212	151.84	163.518	167.212	151.84
Z57 UNIFEEDER Loop G	148.327	167.642	165.3	163.565	167.259	151.887	163.565	167.259	151.887
Z98 UNIFEEDER G16	157.093	167.421	157.584	163.565	167.259	151.887	163.565	167.259	151.887
N03 UNIFEEDER Loop I	133.235	167.913	178.386	149.825	167.439	163.677	156.82	167.239	157.477
N24 - UNIFEEDER LOOP O	147.776	167.655	165.785	160.925	167.325	154.211	163.565	167.259	151.887
ME2 Westbound	126.174	167.811	184.088	133.941	167.49	177.022	137.586	167.34	173.706
ME7 Westbound	127.001	167.896	183.555	147.058	167.165	165.485	153.041	166.948	160.095
SAECS Northbound	122.887	168.027	187.227	136.709	167.511	174.751	144.051	167.237	168.124
SAECS Southbound	123.293	168.012	186.861	138.926	167.428	172.75	147.249	167.117	165.237
N05 BG FREIGHT Loop 5	120.551	168.311	189.695	133.681	167.961	178.102	140.669	167.775	171.932
50E NCL NORWAY FEEDER	159.79	167.354	155.21	163.565	167.259	151.887	163.565	167.259	151.887
ECUMED	129.01	167.777	181.661	142.372	167.267	169.58	150.599	166.953	162.142
47N BG FEEDER Ireland butterfly	134.212	167.944	177.628	151.353	167.485	162.489	163.083	167.172	152.129
SLJ Adriatic Service B	148.885	167.455	164.492	162.473	167.064	152.441	163.345	167.039	151.667
SLO Marmara Sea B	147.687	167.535	165.639	159.789	167.199	154.926	163.405	167.098	151.726
TA6 Eastbound	139.426	167.264	172.032	149.647	166.842	162.733	154.071	166.66	158.708
TA5 Eastbound	140.881	167.189	170.681	152.049	166.724	160.512	156.069	166.556	156.852
TA10 Eastbound	119.163	168.212	190.672	133.285	167.723	177.996	139.981	167.491	171.984
TA10 Westbound	123.076	168.076	187.16	139.894	167.494	172.062	147.725	167.222	165.033
TA5 Westbound	118.627	168.248	191.186	130.22	167.859	180.802	134.808	167.705	176.693
TA6 Westbound	138.463	167.328	172.952	151.637	166.793	160.983	155.524	166.635	157.451
L67 Algerian Link 4	122.402	168.226	187.995	142.244	167.661	170.41	155.712	167.278	158.473
WAF 1	128.044	167.917	182.724	146.476	167.287	166.194	157.527	166.91	156.284
WAF 10	125.737	168.091	184.967	149.275	167.382	164.033	163.267	166.961	151.589
WAF 2	123.568	168.185	186.947	140.111	167.708	172.275	155.079	167.277	158.999
WAF 3	114.606	168.46	194.928	127.011	168.119	183.956	139.183	167.785	173.19
WAF 6	123.28	168.08	186.996	133.808	167.72	177.555	140.838	167.48	171.25
WAF 7 Southbound	126.515	167.984	184.121	142.87	167.434	169.472	157.561	166.941	156.313
Bossanova 96M	132.686	167.675	178.407	143.42	167.278	168.726	154.154	166.882	159.046
Slt Balearic Sea	121.314	168.315	189.066	139.371	167.856	173.164	152.114	167.533	161.941
Z14 - Z14 XCL PTM CAS INTRA MOROCCO	149.6	167.597	164.156	163.549	167.243	151.871	163.549	167.243	151.871
Y63 Casablanca Service	128.446	168.127	182.773	143.78	167.734	169.262	153.069	167.495	161.076
Z43 Tunis Coverage	135.65	167.951	176.441	163.549	167.243	151.871	163.549	167.243	151.871
ME4 Westbound	128.191	167.897	182.563	145.747	167.287	166.801	155.89	166.934	157.694
Z03 XCL	140.055	167.839	172.562	161.489	167.295	153.685	163.549	167.243	151.871
N19 UK West Coast loop 2	125.449	168.178	185.367	148.699	167.556	164.833	163.468	167.161	151.79
N14 BG FREIGHT LOOP 3	114.449	168.474	195.084	126.698	168.147	184.268	138.947	167.821	173.452
WAF 9B	126.46	168.06	184.307	147.798	167.409	165.314	154.061	167.218	159.74
WAF 9C	131.312	167.912	179.989	151.66	167.291	161.877	159.643	167.048	154.772
WAF 5	119.12	168.253	190.783	133.786	167.779	177.68	143.941	167.45	168.607
Z04 XCL ALR ALC CAR	133.936	167.898	177.773	154.325	167.318	159.703	163.367	167.061	151.689
Z07 XCL Atlantic Service	145.956	167.516	167.046	163.313	167.006	151.635	163.313	167.006	151.635
U7D - North Atlantic Express - Northbound	151.297	167.242	162.089	162.729	166.879	151.888	163.171	166.865	151.493
U7D - North Atlantic Express - Southbound	150.505	167.267	162.796	162.699	166.88	151.914	163.171	166.865	151.493
Z06 - Z06 XCL BARCELONA VALENCIA X-PRESS	144.572	167.422	168.029	161.979	166.856	152.471	163.125	166.819	151.447
U7H - Bonita - Northbound	134.913	167.739	176.667	156.077	167.052	157.754	163.129	166.823	151.451
Z02 XCL Cartagena Shuttle	163.549	167.243	151.871	163.549	167.243	151.871	163.549	167.243	151.871
U6C - LA GUAIRA FEEDER - SOUTHBOUND	163.341	167.035	151.663	163.341	167.035	151.663	163.341	167.035	151.663
Z08 XCL VGO & MAR SHUTTLE	142.857	167.747	170.055	163.518	167.212	151.84	163.518	167.212	151.84
Xpress Bahrain Feeder	127.883	167.998	183.006	153.566	167.196	160.111	163.201	166.895	151.523
Xpress Bangladesh Feeder	110.888	168.555	198.204	119.575	168.311	190.509	128.263	168.066	182.813
Mesawa MEA-WAF	132.651	167.797	178.66	148.47	167.276	164.51	158.702	166.939	155.357
Mesawa WAF-MEA	131.797	167.825	179.425	138.088	167.618	173.797	142.982	167.457	169.419
23H Matadi Feeder Service	114.592	168.533	195.074	126.984	168.266	184.248	139.376	167.999	173.422
Berbera Feeder (Y01)	113.891	168.428	195.466	125.583	168.056	185.032	137.274	167.684	174.598
Blue Nile Express	141.382	167.323	170.508	158.287	166.686	155.238	162.821	166.515	151.143
BTL Mangalore Marmagao Feeder (32C)	115.814	168.352	193.722	124.354	168.071	186.084	132.893	167.79	178.446
BTL Tuticorin Feeder (33J)	163.472	167.166	151.794	163.472	167.166	151.794	163.472	167.166	151.794
BTL Cochin Feeder (33R)	127.125	167.936	183.525	152.05	167.072	161.15	162.999	166.693	151.321
Middle East - East Africa	143.677	167.434	168.798	162.839	166.803	151.657	163.101	166.794	151.422
Colombo Kolkata Feeder (S19)	142.886	167.668	169.887	163.404	167.098	151.726	163.404	167.098	151.726
Mawingu Express	147.333	167.314	165.527	162.83	166.803	151.665	163.101	166.794	151.422
Shaheen Express	126.111	167.871	184.252	146.296	167.088	165.977	155.457	166.732	157.684
Fars Vizag Haldia Feeder	131.784	167.977	179.715	158.986	167.221	155.638	163.405	167.098	151.726
Fars Vizag Feeder	138.186	167.63	173.738	163.126	166.819	151.448	163.126	166.819	151.448
Mesawa SAF-MEA	137.726	167.63	174.12	154.904	167.064	158.755	161.247	166.855	153.08
Mesawa	146.228	167.35	166.516	160.818	166.869	153.465	163.101	166.794	151.422
Protea Northbound	117.238	168.268	192.381	130.026	167.816	180.885	142.814	167.364	169.389
Protea Southbound	118.162	168.282	191.636	131.432	167.852	179.777	144.201	167.437	168.366
Simatech Iraq Feeder Y35	139.012	167.561	172.923	163.059	166.752	151.381	163.059	166.752	151.381
Aqaba Feeder	143.077	167.31	169.071	162.894	166.588	151.216	162.894	166.588	151.216
Zanzibar Kisiwa Express	117.038	168.407	192.803	131.875	168.014	179.706	143.313	167.711	169.61
Masika Express	126.611	167.965	184.007	143.99	167.371	168.421	152.06	167.095	161.183
Shuwaikh Feeder	136.464	167.692	175.288	163.119	166.83	151.473	163.136	166.83	151.458
IOI	120.197	168.208	189.802	135.852	167.693	175.799	149.106	167.257	163.944
Cape Town Express	108.481	168.601	200.295	114.763	168.401	194.69	121.044	168.202	189.085
Musafir Express	116.527	168.338	193.103	130.853	167.877	180.306	145.18	167.415	167.509
Nubian Express	107.135	168.657	201.522	111.711	168.525	197.463	115.412	168.418	194.179
Oman Sohar Feeder y02	140.453	167.471	171.554	162.994	166.687	151.316	162.994	166.687	151.316
Simatech Karachi Feeder	162.899	166.593	151.221	162.899	166.593	151.221	162.899	166.593	151.221
Al Milaha Doha Feeder (34O)	147.885	167.323	165.084	163.136	166.83	151.458	163.136	166.83	151.458
AMEX Southbound	124.293	168.193	186.357	137.749	167.823	174.455	145.038	167.622	168.008
AMEX Roundtrip	123.45	168.216	187.103	134.075	167.924	177.705	141.63	167.716	171.022
AMEX Northbound	123.289	168.22	187.246	136.133	167.867	175.884	143.091	167.676	169.73
Wafex-Backhaul	110.677	168.5	198.279	114.867	168.351	194.512	118.057	168.238	191.643
WAFEX - HEADHAUL	113.776	168.372	195.459	119.842	168.148	189.988	124.113	167.99	186.135
Wafex Westbound	112.705	168.413	196.428	119.205	168.173	190.566	123.374	168.02	186.807
Simatech Colombo Jebel Ali Feeder	127.64	168.061	183.323	153.081	167.321	160.747	163.33	167.023	151.651
ICFS Ajman Feeder	163.999	167.693	152.321	163.999	167.693	152.321	163.999	167.693	152.321
ICFS Fujairah Feeder M18	144.965	167.285	167.449	162.954	166.647	151.275	162.954	166.647	151.275
U4C - PATAGONIA FEEDER 2 - SOUTHBOUND	129.1	167.99	181.976	155.272	167.202	158.7	163.267	166.961	151.589
U4C - PATAGONIA FEEDER 2 - NORTHBOUND	121.03	168.233	189.153	139.86	167.666	172.407	154.872	167.214	159.056
G3D San Antonio ESTE Loop	117.658	168.33	192.145	133.116	167.861	178.389	148.575	167.391	164.634
UGA - Parana River Feeder - Northbound	131.513	167.87	179.743	148.84	167.32	164.281	158.611	167.01	155.562
U4B - PATAGONIA FEEDER - NORTHBOUND	127.139	168.113	183.838	150.758	167.463	162.945	162.852	167.13	152.247
U4B - PATAGONIA FEEDER - SOUTHBOUND	132.127	167.976	179.426	158.884	167.239	155.756	163.421	167.115	151.743
UGA - Parana River Feeder - Southbound	131.513	167.87	179.743	148.84	167.32	164.281	158.611	167.01	155.562
Zarate Feeder Northbound	157.536	167.278	156.953	163.423	167.117	151.745	163.423	167.117	151.745
G9A Ushuaia Feeder	127.162	168.134	183.857	152.124	167.468	161.814	163.472	167.166	151.794
Zarate Feeder Southbound	147.881	167.544	165.493	163.423	167.117	151.745	163.423	167.117	151.745
UHA - GULFEX - SOUTHBOUND	122.323	167.98	187.611	136.807	167.39	174.448	145.652	167.03	166.409
Zarate Loop	142.049	167.704	170.652	156.177	167.316	158.154	163.423	167.117	151.745
UHC - TANGO - NORTHBOUND	143.1	167.407	169.229	152.26	167.095	161.016	159.582	166.846	154.451
UHC - TANGO - SOUTHBOUND	148.53	167.222	164.36	153.797	167.043	159.638	159.065	166.863	154.916
U4F	145.633	167.143	166.632	162.794	166.488	151.116	162.794	166.488	151.116
CFS ACMH	129.898	168.067	181.451	156.163	167.371	158.267	163.484	167.177	151.805
Calypso Feeder Roundtrip	132.853	167.962	178.795	154.284	167.376	159.844	163.432	167.126	151.754
ACX Northbound	126.079	167.815	184.175	138.118	167.318	173.222	144.384	167.06	167.522
ACX Southbound	128.158	167.729	182.283	140.203	167.232	171.325	146.916	166.955	165.218
U4A - NEW BRAZEX - NORTHBOUND	127.675	167.785	182.789	140.281	167.283	171.353	143.791	167.143	168.168
U4A - NEW BRAZEX - SOUTHBOUND	131.153	167.646	179.633	144.264	167.124	167.739	150.617	166.871	161.975
U4G - CONOSUR - EASTBOUND	125.134	167.925	185.165	141.684	167.293	170.201	149.614	166.99	163.031
U4G - CONOSUR - WESTBOUND	126.854	167.859	183.61	146.161	167.122	166.154	154.685	166.797	158.446
UHA - GULFEX - NORTHHBOUND	126.667	167.825	183.703	146.638	167.029	165.584	160.156	166.49	153.32
U4X - MANAUS SHUTTLE - SOUTHBOUND	122.872	168.069	187.317	138.731	167.509	173.06	149.778	167.118	163.129
U4X - MANAUS SHUTTLE - NORTHBOUND	121.149	168.13	188.866	135.687	167.616	175.797	144.26	167.313	168.09
UHD - UCLA - NORTHBOUND	132.859	167.79	178.475	149.399	167.246	163.679	161.579	166.844	152.783
U5A Atacama - Northbound	147.429	167.365	165.541	163.171	166.865	151.493	163.171	166.865	151.493
U5A Atacama - Southbound	140.245	167.593	171.951	156.928	167.063	157.065	163.171	166.865	151.493
America Shuttle 2 - Southbound	132.604	167.812	178.728	155.703	167.062	158.085	163.127	166.821	151.449
America Shuttle 2 - Northbound	132.604	167.812	178.728	150.164	167.242	163.035	160.299	166.913	153.977
U7J - (AGAS) - SOUTHBOUND	146.567	167.392	166.31	162.799	166.877	151.826	163.171	166.865	151.493
U7J - (AGAS) - NORTHBOUND	151.995	167.22	161.466	162.755	166.878	151.865	163.171	166.865	151.493
U7H - Bonita - Southbound	136.252	167.695	175.47	153.812	167.125	159.778	159.906	166.928	154.332
Calypso Feeder Westbound	146.766	167.582	166.492	163.432	167.126	151.754	163.432	167.126	151.754
U6A - CARIBBEAN FEEDER - WESTBOUND	137.671	167.482	173.895	159.36	166.676	154.326	162.853	166.547	151.175
U6A - CARIBBEAN FEEDER - EASTBOUND	137.671	167.482	173.895	159.36	166.676	154.326	162.853	166.547	151.175
U6D - Cumbia Feeder - Westbound	154.556	167.203	159.299	163.244	166.938	151.566	163.244	166.938	151.566
U6D - Cumbia Feeder - Eastbound	141.486	167.602	170.933	161.834	166.981	152.822	163.244	166.938	151.566
Venezuela Feeder PBL Eastbound	160.989	167.103	153.749	163.341	167.035	151.663	163.341	167.035	151.663
Venezuela Feeder LAG Eastbound	160.989	167.103	153.749	163.341	167.035	151.663	163.341	167.035	151.663
Venezuela Feeder	142.591	167.634	170.07	163.341	167.035	151.663	163.341	167.035	151.663
Venezuela Feeder LAG Westbound	151.191	167.386	162.441	163.341	167.035	151.663	163.341	167.035	151.663
Venezuela Feeder PBL Westbound	160.989	167.103	153.749	163.341	167.035	151.663	163.341	167.035	151.663
NAE Southbound	158.058	167.027	156.056	163.171	166.865	151.493	163.171	166.865	151.493
OAS Northbound	134.981	167.661	176.467	151.688	167.08	161.467	162.615	166.701	151.656
OAS Southbound	138.26	167.547	173.524	156.637	166.908	157.024	162.994	166.688	151.316
U8E West Coast Cental America 2 - Northbound	150.721	167.28	162.639	163.195	166.889	151.517	163.195	166.889	151.517
U7A - South Atlantic Express - Northbound	144.586	167.425	168.023	159.712	166.934	154.505	163.129	166.823	151.451
U5C Caldera Feeder - Eastbound	130.916	167.924	180.341	159.631	167.048	154.782	163.244	166.938	151.566
U5C Caldera Feeder - Westbound	140.488	167.632	171.821	163.244	166.938	151.566	163.244	166.938	151.566
U6I - C4EX - NORTHBOUND	138.843	167.87	173.629	157.957	167.385	156.796	163.549	167.243	151.871
Caribbean Feeder Westbound	128.16	167.836	182.477	146.539	167.153	165.894	160.095	166.649	153.664
Caribbean Feeder Eastbound	133.707	167.629	177.473	157.863	166.732	155.677	162.853	166.547	151.175
U5D Guayaquil Feeder - Southbound	125.737	168.091	184.967	149.275	167.382	164.033	163.267	166.961	151.589
U5D Guayaquil Feeder - Northbound	133.583	167.855	177.989	163.267	166.961	151.589	163.267	166.961	151.589
U8E West Coast Cental America 2 - Southbound	143.06	167.52	169.469	163.195	166.889	151.517	163.195	166.889	151.517
U8A West Coast Cental America - Northbound	133.679	167.775	177.762	159.788	166.924	154.424	163.122	166.816	151.444
U8A West Coast Cental America - Southbound	129.744	167.903	181.28	144.974	167.407	167.666	158.746	166.958	155.355
U7A - South Atlantic Express - Southbound	143.249	167.468	169.217	161.314	166.882	153.073	163.129	166.823	151.451
U6I - C4EX - SOUTHBOUND	130.078	168.092	181.348	149.193	167.607	164.514	163.549	167.243	151.871
U7I - GULF OCEAN EXPRESS (GOEX) - NORTHBOUND	137.251	167.56	174.389	154.544	166.949	158.843	162.958	166.651	151.279
U7I - GULF OCEAN EXPRESS (GOEX) - SOUTHBOUND	131.76	167.755	179.326	150.337	167.098	162.625	160.445	166.74	153.539
U6E - SOCA FEEDER - NORTHBOUND	131.95	167.995	179.608	161.701	167.191	153.317	163.45	167.143	151.772
U6E - SOCA FEEDER - SOUTHBOUND	146.826	167.593	166.463	163.45	167.143	151.772	163.45	167.143	151.772
U6J - JAMAICA-HAITI FEEDER - NORTHBOUND	136.805	167.884	175.355	161.318	167.235	153.717	163.484	167.177	151.805
U6J - JAMAICA-HAITI FEEDER - SOUTHBOUND	136.805	167.884	175.355	161.318	167.235	153.717	163.484	167.177	151.805
SL Atlantico Southbound	135.49	167.72	176.15	155.8	167.061	158.001	163.129	166.823	151.451
Guanta Feeder Eastbound	126.262	168.162	184.659	149.242	167.552	164.372	161.273	167.233	153.751
Guanta Feeder Westbound	129.699	168.07	181.624	147.208	167.606	166.168	160.957	167.241	154.03
U6K - Calypso Feeder - Southbound	126.73	168.129	184.209	143.046	167.683	169.781	151.222	167.46	162.551
U6K - Calypso Feeder - Northbound	122.641	168.241	187.824	139.66	167.776	172.775	153.257	167.404	160.751
CFS Maracaibo	121.916	168.278	188.497	133.972	167.959	177.855	146.027	167.639	167.214
U6C - LA GUAIRA FEEDER - NORTHBOUND	159.83	167.246	154.979	163.454	167.148	151.776	163.454	167.148	151.776
U5G - PERU FEEDER - SOUTHBOUND	127.77	167.967	183.044	138.847	167.606	173.143	148.863	167.28	164.19
U5G - PERU FEEDER - NORTHBOUND	143.516	167.454	168.969	163.122	166.816	151.444	163.122	166.816	151.444
U2M	124.704	168.203	186.034	138.453	167.838	173.896	152.203	167.473	161.758
